# Supplementary material for: Ru(ii)-catalyzed allenylation and sequential annulation of N-tosylbenzamides with propargyl alcohols
Source: Royal Society of Chemistry journal article supplement (doi:10.1039/d1cc01768c), 2021-01-01

## Supporting Information

### **Ru(II)-catalyzed Allenylation and Sequential Annulation of *N*-Tosylbenzamides with Propargyl Alcohols**

Shreemoyee Kumar, Akshay M. Nair, Chandra M. R. Volla\*

*Department of Chemistry, Indian Institute of Technology Bombay,*

*Powai, Mumbai 400076, India*

*E-mail: [chandra.volla@chem.iitb.ac.in](mailto:chandra.volla@chem.iitb.ac.in)*

## Table of Contents

| S. No. | Content                                                                        | Page No. |
|--------|--------------------------------------------------------------------------------|----------|
| 1.     | General Information                                                            | S3       |
| 2.     | Proposed mechanism                                                             | S3       |
| 3.     | Experimental Section                                                           |          |
|        | a) General Procedure for the preparation of N-Tosyl Benzamides                 | S3       |
|        | b) General Procedure for the synthesis of Propargyl Alcohols                   | S4       |
|        | c) General Optimization Table                                                  | S5       |
|        | d) Failed substrates                                                           | S6       |
|        | e) Procedure to demonstrate Synthesis of C-2 Allenyl <i>N</i> -Tosyl Benzamide | S6       |
|        | f) Procedure for base assisted annulation of allenylated benzamides            | S20      |
|        | g) Procedure for Gram Scale Synthesis of 3a                                    | S25      |
|        | h) Procedure for Pd/C assisted reduction of 3b to obtain 5                     | S25      |
|        | i) Procedure for base catalysed hydrolysis of 3a                               | S26      |
|        | j) Procedure for iodonium induced cyclisation of 3a                            | S27      |
|        | k) Procedure for Intermolecular Competition Experiment                         | S28      |
|        | l) Procedure for Reaction with MeOH- <i>d</i> 4                                | S28      |
|        | m) Procedure for Kinetic Isotopic Studies                                      | S28      |
| 4.     | References                                                                     | S30      |
| 5.     | <sup>1</sup> H and <sup>13</sup> C NMR Spectra of Compounds                    | S31      |

## 1. General Information

All reactions were carried out under nitrogen atmosphere in screw cap reaction tubes and the workups were performed under air. All the solvents used for the reactions were dried by following the reported procedures. Unless otherwise noted, all materials were purchased from commercial suppliers and used as received. Reactions were monitored using thin-layer chromatography. A gradient elution using petroleum ether and ethyl acetate was performed based on Merck aluminium TLC sheets (silica gel 60F<sub>254</sub>). TLC plates were visualized with UV light (254 nm) or KMnO<sub>4</sub> stain or Anisaldehyde stain. For column chromatography, silica gel (100–200 mesh) from SRL Co. was used. NMR studies were performed on Bruker Advance DPX at 400 MHz (<sup>1</sup>H) or 500 MHz (<sup>1</sup>H) and at 100 MHz (<sup>13</sup>C) or 125 MHz (<sup>13</sup>C), respectively. Chemical shifts ( $\delta$ ) are reported in ppm, using the residual solvent peak in CDCl<sub>3</sub> ( $\delta$ H = 7.26 and  $\delta$ C = 77.16) ppm as internal standards, and coupling constants ( $J$ ) are given in Hz. HRMS were recorded with Bruker Maxis impact mass spectrometer using ESI-TOF techniques. FTIR measurements were performed on an Agilent Cary 630 FTIR Spectrometer.

## 2. Proposed mechanism

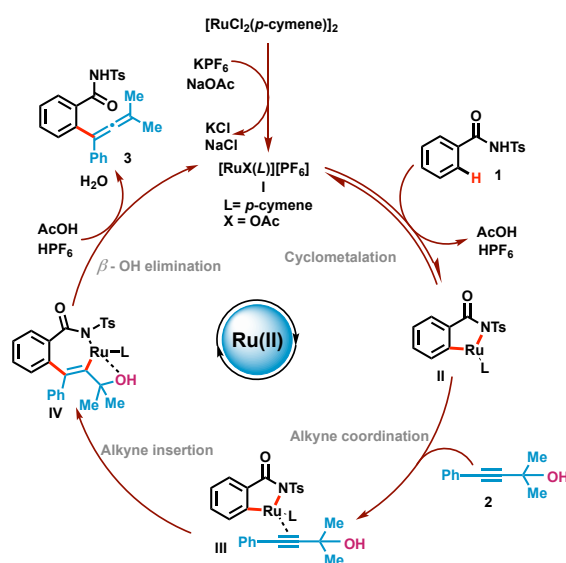

## 3. Experimental Section

### Preparation of Starting Materials

#### (a) Typical Procedure for the preparation of *N*-Tosyl Benzamides

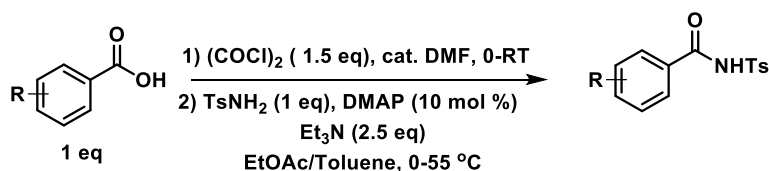

To a solution of substituted benzoic acid (3 mmol) and DMF (6  $\mu$ L) in DCM (20 mL) under  $N_2$  atmosphere was dropwise added oxalyl chloride (381  $\mu$ L, 4.5 mmol). The reaction was stirred until the solid suspension disappeared. Then solvent was removed under reduced pressure and the residue was dissolved in toluene (3 mL). The above acyl chloride was then added dropwise to a solution of *p*-toluenesulfonamide (606 mg, 3.0 mmol), DMAP (36 mg, 0.3 mmol) and  $Et_3N$  (1.04 mL, 7.5 mmol) in EtOAc (6 mL) at 0  $^{\circ}C$  over 15 minutes. The mixture was stirred at 55  $^{\circ}C$  until no further reaction was noticed (TLC analysis), cooled to room temperature and quenched with HCl (1N, 20 mL). The resulting mixture was extracted with EtOAc (20 mL  $\times$  3). The combined organic layers were dried over anhydrous  $Na_2SO_4$ , filtered and evaporated under reduced pressure. The residue was purified by flash silica gel chromatography with petroleum ether/EtOAc (2:1) to afford the benzamides 80-92% yields as white solids.

#### (b) Typical Procedure for the preparation of propargyl alcohols

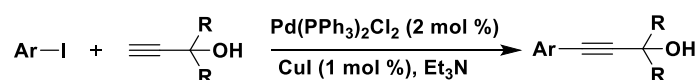

To a solution of iodobenzene (3.18 mmol), CuI (21.83 mg, 1 mol%), and  $PdCl_2(PPh_3)_2$  (80.47 mg, 2 mol%) in 15 mL  $NEt_3$  under nitrogen atmosphere was added alkynol (3.82 mmol, 1.1 eq) at ambient temperature. Then the reaction mixture was heated to 50  $^{\circ}C$  for 6 h. The reaction was quenched with water (30 mL), extracted with dichloromethane (DCM) (3  $\times$  30 mL). Drying collected organic layer over magnesium sulfate followed by concentration, the product was obtained as yellow oil by column chromatography (silica, hexane/ethyl acetate (5:1)).

#### 1ae

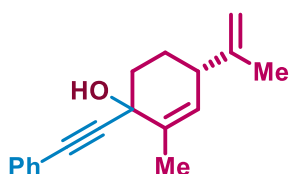

#### 2-methyl-1-(phenylethynyl)-4-(prop-1-en-2-yl)cyclohex-2-en-1-ol

$^1H$  NMR (500 MHz,  $CDCl_3$ ):  $\delta$  7.45 (dd,  $J = 6.6, 3.0$  Hz, 2H), 7.33 (dd,  $J = 4.9, 1.7$  Hz, 3H), 5.57 (dd,  $J = 3.4, 1.5$  Hz, 1H), 4.80 (s, 2H), 2.66 – 2.60 (m, 1H), 2.39 (d,  $J = 12.0$  Hz, 1H),

2.33 (s, 1H), 2.24 – 2.19 (m, 1H), 2.04 – 1.99 (m, 1H), 1.94 (s, 3H), 1.90 – 1.85 (m, 1H), 1.80 (s, 3H).

<sup>13</sup>C NMR (125 MHz, CDCl<sub>3</sub>): δ 148.6, 135.9, 131.9, 128.5, 128.4, 124.7, 122.8, 109.4, 92.1, 84.3, 70.4, 43.7, 39.9, 31.2, 20.9, 17.4.

(c) General Optimization Table<sup>a</sup>

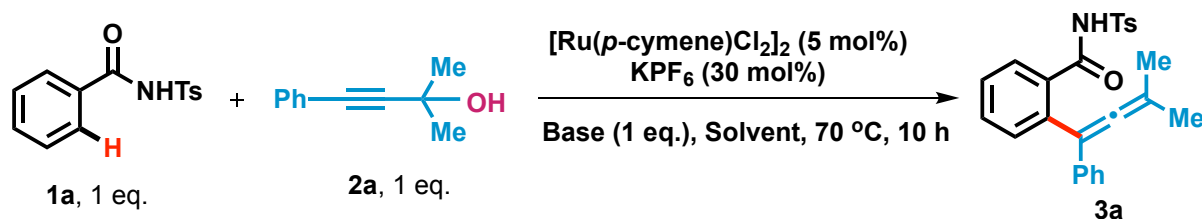

| Entry    | Base                            | Solvent     | Yield            |
|----------|---------------------------------|-------------|------------------|
| 1        | NaOPiv                          | DCE         | 45 (41)          |
| 2        | Na <sub>2</sub> CO <sub>3</sub> | DCE         | 20               |
| 3        | NaHCO <sub>3</sub>              | DCE         | traces           |
| <b>4</b> | <b>NaOAc</b>                    | <b>DCE</b>  | <b>82 (81)</b>   |
| 5        | KOAc                            | DCE         | 66               |
| 6        | CsOAc                           | DCE         | 42               |
| 7        | NaOAc                           | DCE         | - <sup>b</sup>   |
| 8        | NaOAc                           | DCE         | - <sup>c</sup>   |
| 9        | NaOAc                           | Toluene     | 61               |
| 10       | NaOAc                           | MeCN        | 43               |
| 11       | NaOAc                           | DCM         | 22               |
| 12       | NaOAc                           | 1,4-Dioxane | 37               |
| 13       | NaOAc                           | MeOH        | traces           |
| 14       | NaOAc                           | DMF         | NR               |
| 15       | NaOAc                           | DCE         | 63% <sup>d</sup> |
| 16       | NaOAc                           | DCE         | 70% <sup>e</sup> |
| 17       | NaOAc                           | DCE         | 39% <sup>f</sup> |

[a] <sup>a</sup>Unless specified in parenthesis, NMR yields were calculated using 1,2,3-trimethoxybenzene as external standard. Reaction conditions: **1a** (0.15 mmol), **2a** (0.15 mmol),  $[\text{RuCl}_2(p\text{-cymene})]_2$  (5 mol%),  $\text{KPF}_6$  (30 mol%), base (1 eq.), solvent (1.5 mL), 70 °C. <sup>b</sup>Reaction without Ru(II) catalyst. <sup>c</sup>Reaction without  $\text{KPF}_6$ . <sup>d</sup>Reaction at 60 °C. <sup>e</sup>Reaction at 90 °C. <sup>f</sup>30 mol% NaOAc.

#### (d) Failed substrates:

Following substrates failed to deliver the corresponding allenylation product under the established standard conditions.

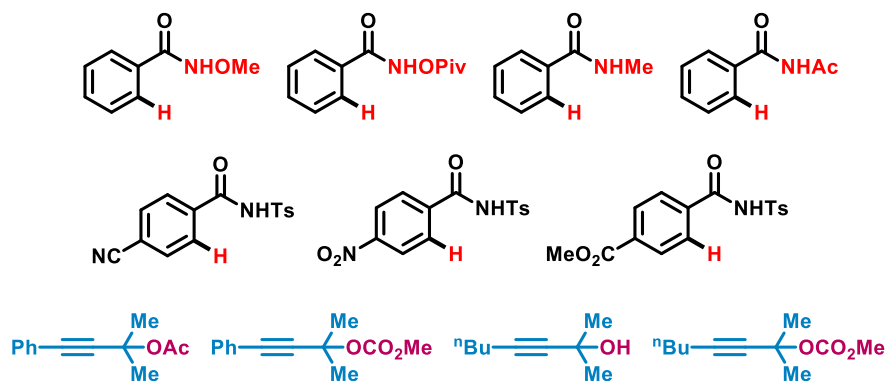

#### (e) Typical Procedure for the Synthesis of C-2 Allenyl *N*-Tosyl Benzamide

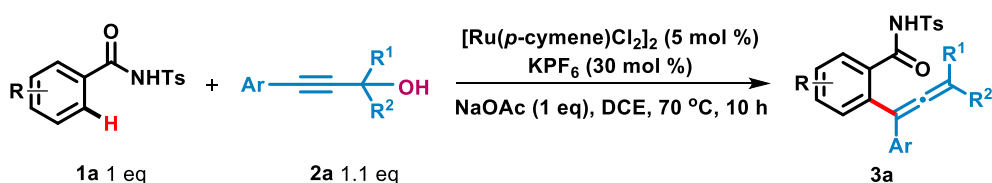

To an oven dried screw cap reaction tube equipped with a magnetic stir bar, was added *N*-Tosylbenzamide (0.2 mmol, 1 eq), [Ru(*p*-cymene)Cl<sub>2</sub>]<sub>2</sub> (6 mg, 0.007 mmol), KPF<sub>6</sub> (7.3 mg, 0.045 mmol), NaOAc (16.4 mg, 0.2 mmol) and propargyl alcohol (0.2 mmol) followed by 1.0 ml DCE. After heating the reaction mixture at 70 °C for 8-10 h, it was cooled to room temperature and the solvent was evaporated under reduced pressure. The residue was purified by silica gel column chromatography (mesh 100-200; hexane: ethyl acetate 95:5 to 80:20) to give allenylated products. (R<sub>f</sub> values from 0.4-0.5 in hexane : EA = 4:1)

#### 3a.

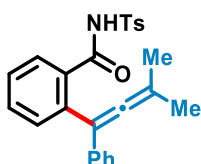

#### 2-(3-methyl-1-phenylbuta-1,2-dien-1-yl)-*N*-tosylbenzamide

67 mg, 81%, colourless oil

**<sup>1</sup>H NMR (500 MHz, CDCl<sub>3</sub>):** δ 9.43 (s, 1H), 7.96 (d, *J* = 6.9 Hz, 1H), 7.55 (dd, *J* = 7.5, 1.2 Hz, 1H), 7.45 (t, *J* = 7.4 Hz, 3H), 7.32 (d, *J* = 7.6 Hz, 1H), 7.25 – 7.20 (m, 3H), 7.12 – 7.02 (m, 4H), 2.36 (s, 3H), 1.94 (s, 6H).

**<sup>13</sup>C NMR (125 MHz, CDCl<sub>3</sub>):** δ 202.0, 164.5, 144.6, 136.4, 135.8, 133.1, 132.1, 130.8, 130.7, 129.6, 129.4, 129.1, 128.4, 127.5, 126.9, 126.6, 105.8, 101.7, 21.8, 20.2.

**HRMS (ESI):** C<sub>25</sub>H<sub>23</sub>NNaO<sub>3</sub>S [M+Na]<sup>+</sup> calculated = 440.1291; found = 440.1296.

3b.

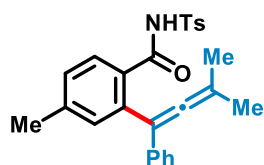

**4-methyl-2-(3-methyl-1-phenylbuta-1,2-dien-1-yl)-*N*-tosylbenzamide**

67 mg, 78%, colourless oil

**<sup>1</sup>H NMR (500 MHz, CDCl<sub>3</sub>):** δ 9.48 (s, 1H), 7.99 (d, *J* = 7.7 Hz, 1H), 7.62 – 7.43 (m, 4H), 7.34 (d, *J* = 7.4 Hz, 1H), 7.14 – 6.88 (m, 6H), 2.39 (s, 3H), 2.37 (s, 3H), 1.96 (s, 3H).

**<sup>13</sup>C NMR (125 MHz, CDCl<sub>3</sub>):** δ 203.3, 163.5, 149.0, 145.1, 138.3, 138.0, 136.7, 134.4, 133.1, 129.7, 128.9, 128.5, 127.1, 126.7, 125.5, 121.4, 100.2, 91.5, 22.0, 20.2, 19.9.

**HRMS (ESI):** C<sub>26</sub>H<sub>26</sub>NO<sub>3</sub>S [M+H]<sup>+</sup> calculated = 432.1628; found = 432.1631.

3c.

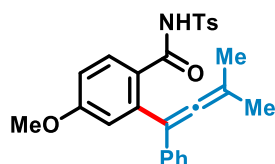

**4-methoxy-2-(3-methyl-1-phenylbuta-1,2-dien-1-yl)-*N*-tosylbenzamide**

64 mg, 72%, colourless oil

**<sup>1</sup>H NMR (400 MHz, CDCl<sub>3</sub>):** δ 9.54 (s, 1H), 7.99 (d, *J* = 8.8 Hz, 1H), 7.81 (d, *J* = 8.2 Hz, 2H), 7.38 – 7.30 (m, 4H), 7.25 – 7.23 (m, 2H), 7.09 – 7.03 (m, 3H), 3.85 (s, 3H), 2.34 (s, 3H), 1.96 (s, 6H).

**<sup>13</sup>C NMR (100 MHz, CDCl<sub>3</sub>):** δ 201.6, 165.7, 163.5, 140.6, 129.9, 129.4, 129.1, 128.8, 128.5, 128.4, 128.0, 126.6, 126.6, 125.3, 117.4, 114.5, 106.3, 101.9, 56.1, 21.7, 20.2.

**HRMS (ESI):** C<sub>26</sub>H<sub>26</sub>NO<sub>4</sub>S [M+H]<sup>+</sup> calculated = 448.1577; found = 448.1579.

3d.

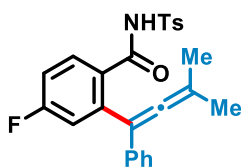

**4-fluoro-2-(3-methyl-1-phenylbuta-1,2-dien-1-yl)-N-tosylbenzamide**

60 mg, 70%, pale yellow oil

**<sup>1</sup>H NMR (400 MHz, CDCl<sub>3</sub>):** δ 9.41 (s, 1H), 7.97 (dd, *J* = 8.7, 5.8 Hz, 1H), 7.81 (d, *J* = 8.2 Hz, 2H), 7.44 (d, *J* = 8.2 Hz, 3H), 7.30 (d, *J* = 8.0 Hz, 1H), 7.26 – 7.21 (m, 4H), 7.16 – 6.95 (m, 1H), 2.36 (s, 3H), 1.94 (s, 6H).

**<sup>13</sup>C NMR (100 MHz, CDCl<sub>3</sub>):** δ 201.8, 163.9, 163.4 (d, *J*<sub>C-F</sub> = 231.9 Hz), 144.7, 143.6, 139.2, 135.7, 133.4 (d, *J*<sub>C-F</sub> = 3.6 Hz), 129.8, 129.4, 129.1, 128.3, 127.6, 126.5 (d, *J*<sub>C-F</sub> = 8.6 Hz), 119.0, 118.8, 115.7 (d, *J*<sub>C-F</sub> = 28.0 Hz), 105.1, 102.3, 21.6, 20.1.

**HRMS (ESI):** C<sub>25</sub>H<sub>23</sub>FNO<sub>3</sub>S [M+H]<sup>+</sup> calculated = 436.1377; found = 436.1382.

3e.

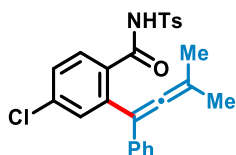

**4-chloro-2-(3-methyl-1-phenylbuta-1,2-dien-1-yl)-N-tosylbenzamide**

65 mg, 72%, yellow oil

**<sup>1</sup>H NMR (400 MHz, CDCl<sub>3</sub>):** δ 9.40 (s, 1H), 7.87 (d, *J* = 8.5 Hz, 1H), 7.80 (d, *J* = 8.2 Hz, 4H), 7.45 (d, *J* = 8.3 Hz, 2H), 7.40 (dd, *J* = 8.5, 2.1 Hz, 1H), 7.31 – 7.23 (m, 5H), 7.09 (d, *J* = 8.1 Hz, 2H), 7.06 – 6.98 (m, 2H), 2.36 (s, 3H), 1.94 (s, 6H).

**<sup>13</sup>C NMR (101 MHz, CDCl<sub>3</sub>):** δ 201.9, 163.5, 144.7, 143.6, 139.2, 135.7, 132.1, 131.8, 129.7, 129.4, 129.1, 128.7, 128.3, 127.6, 126.5, 126.4, 104.8, 102.3, 21.6, 20.1.

**HRMS (ESI):** C<sub>25</sub>H<sub>23</sub>ClNO<sub>3</sub>S [M+H]<sup>+</sup> calculated = 452.1082; found = 452.1086.

3f.

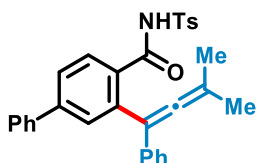

**3-(3-methyl-1-phenylbuta-1,2-dien-1-yl)-N-tosyl-[1,1'-biphenyl]-4-carboxamide**

61 mg, 62%, colourless oil



**<sup>1</sup>H NMR (400 MHz, CDCl<sub>3</sub>):** δ 9.53 (s, 1H), 8.06 (d, *J* = 8.2 Hz, 1H), 7.67 (dd, *J* = 8.2, 1.7 Hz, 1H), 7.61 (d, *J* = 7.3 Hz, 2H), 7.54 (d, *J* = 1.6 Hz, 1H), 7.50 – 7.44 (m, 4H), 7.41 (d, *J* = 7.2 Hz, 1H), 7.25 (d, *J* = 2.3 Hz, 3H), 7.20 – 6.99 (m, 4H), 2.36 (s, 3H), 1.97 (s, 6H).

**<sup>13</sup>C NMR (100 MHz, CDCl<sub>3</sub>):** δ 201.9, 164.2, 145.9, 144.6, 139.3, 136.3, 136.2, 135.2, 131.5, 130.5, 129.6, 129.4, 129.1, 129.1, 128.6, 128.4, 127.5, 127.4, 127.0, 126.6, 105.8, 101.8, 21.7, 20.2.

**HRMS (ESI):** C<sub>31</sub>H<sub>28</sub>NO<sub>3</sub>S [M+H]<sup>+</sup> calculated = 494.1784; found = 494.1792.

**3g.**

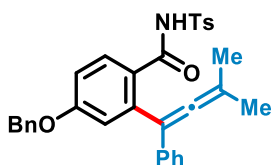

**4-(benzyloxy)-2-(3-methyl-1-phenylbuta-1,2-dien-1-yl)-N-tosylbenzamide**

59 mg, 57%, yellow oil

**<sup>1</sup>H NMR (400 MHz, CDCl<sub>3</sub>):** δ 9.57 (s, 1H), 8.03 (d, *J* = 8.8 Hz, 1H), 7.94 (m, 1H), 7.84 (d, *J* = 8.2 Hz, 1H), 7.41 (d, *J* = 8.2 Hz, 2H), 7.35 (d, *J* = 8.1 Hz, 1H), 7.27 (dd, *J* = 8.4, 5.0 Hz, 5H), 7.14 – 7.06 (m, 4H), 6.97 (dd, *J* = 8.8, 2.5 Hz, 1H), 6.83 (d, *J* = 2.5 Hz, 1H), 3.88 (s, 2H), 2.37 (s, 3H), 2.00 (s, 6H).

**<sup>13</sup>C NMR (100 MHz, CDCl<sub>3</sub>):** δ 201.8, 170.7, 163.8, 135.7, 133.4, 131.7, 130.8, 129.1, 128.8, 128.5, 128.4, 128.3, 127.7, 126.8, 126.4, 118.2, 116.7, 114.3, 113.5, 109.7, 106.7, 99.4, 70.3, 30.0, 20.1.

**HRMS (ESI):** C<sub>32</sub>H<sub>30</sub>NO<sub>4</sub>S [M+H]<sup>+</sup> calculated = 524.1890; found = 524.1894.

**3h.**

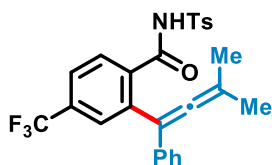

**2-(3-methyl-1-phenylbuta-1,2-dien-1-yl)-N-tosyl-4-(trifluoromethyl)benzamide**

32 mg, 33%, colourless oil

**<sup>1</sup>H NMR (500 MHz, CDCl<sub>3</sub>):** δ 9.07 (s, 1H), 7.91 (d, *J* = 7.5 Hz, 1H), 7.84 (d, *J* = 8.2 Hz, 2H), 7.60 (t, *J* = 6.8 Hz, 2H), 7.49 (t, *J* = 7.6 Hz, 1H), 7.42 (d, *J* = 7.6 Hz, 1H), 7.34 (d, *J* = 8.1 Hz, 2H), 7.29 (m, 1H), 7.19 (d, *J* = 7.9 Hz, 1H), 7.13 (d, *J* = 8.1 Hz, 1H), 2.46 (s, 3H), 1.96 (s, 6H).

**<sup>13</sup>C NMR (125 MHz, CDCl<sub>3</sub>):** δ 202.6, 164.4, 144.9, 143.7, 139.1, 136.4 (q,  $J_{C-F}$  = 255.3 Hz) 135.0, 133.1, 132.0, 130.3, 129.6 (q,  $J_{C-F}$  = 43.1 Hz), 129.3, 128.8, 128.3, 126.6, 123.8 (q,  $J_{C-F}$  = 3.8 Hz), 122.9 (q,  $J_{C-F}$  = 3.7 Hz), 104.9, 102.3, 21.6, 20.1.

**HRMS (ESI):** C<sub>26</sub>H<sub>23</sub>F<sub>3</sub>NO<sub>3</sub>S [M+H]<sup>+</sup> calculated = 486.1345; found = 486.1332.

3i.

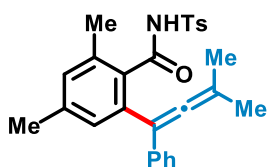

**2,4-dimethyl-6-(3-methyl-1-phenylbuta-1,2-dien-1-yl)-N-tosylbenzamide**

64 mg, 72%, colourless oil

**<sup>1</sup>H NMR (400 MHz, CDCl<sub>3</sub>):** δ 7.95 (d,  $J$  = 8.1 Hz, 2H), 7.29 – 7.18 (m, 6H), 7.08 (dd,  $J$  = 7.7, 1.6 Hz, 2H), 7.01 (s, 1H), 6.90 (s, 1H), 2.64 (s, 3H), 2.40 (s, 3H), 2.34 (s, 3H), 1.79 (s, 3H), 1.55 (s, 3H).

**<sup>13</sup>C NMR (100 MHz, CDCl<sub>3</sub>):** δ 200.5, 167.9, 146.1, 144.4, 142.8, 141.1, 139.8, 139.4, 132.3, 129.1, 128.6, 128.0, 127.7, 125.3, 123.3, 119.8, 105.0, 102.6, 22.8, 22.1, 21.6, 20.2, 18.8.

**HRMS (ESI):** C<sub>27</sub>H<sub>28</sub>NO<sub>3</sub>S [M+H]<sup>+</sup> calculated = 446.1784; found = 446.1786.

3j.

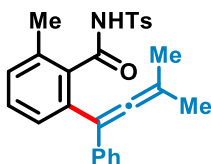

**2-methyl-6-(3-methyl-1-phenylbuta-1,2-dien-1-yl)-N-tosylbenzamide**

68 mg, 79%, colourless oil

**<sup>1</sup>H NMR (400 MHz, CDCl<sub>3</sub>):** δ 7.98 – 7.91 (m, 2H), 7.69 (d,  $J$  = 8.2 Hz, 2H), 7.33 (t,  $J$  = 7.7 Hz, 1H), 7.23 – 7.18 (m, 4H), 7.14 – 7.08 (m, 2H), 7.05 (d,  $J$  = 7.4 Hz, 2H), 2.43 (s, 3H), 2.27 (s, 3H), 1.65 (s, 6H).

**<sup>13</sup>C NMR (100 MHz, CDCl<sub>3</sub>):** δ 202.2, 164.3, 144.5, 136.2, 135.7, 135.1, 134.2, 133.1, 132.0, 130.8, 129.3, 129.0, 128.5, 128.3, 127.3, 126.3, 106.0, 104.8, 22.6, 21.7, 18.4.

**HRMS (ESI):** C<sub>26</sub>H<sub>26</sub>NO<sub>3</sub>S [M+H]<sup>+</sup> calculated = 432.1628; found = 432.1626.

3k.

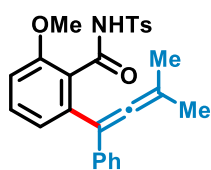

**2-methoxy-6-(3-methyl-1-phenylbuta-1,2-dien-1-yl)-N-tosylbenzamide**

68 mg, 77%, colourless oil

**<sup>1</sup>H NMR (500 MHz, CDCl<sub>3</sub>):** δ 9.57 (s, 1H), 8.03 (d, *J* = 8.8 Hz, 1H), 7.84 (d, *J* = 8.2 Hz, 1H), 7.41 (d, *J* = 8.2 Hz, 1H), 7.35 (d, *J* = 8.1 Hz, 1H), 7.28 – 7.26 (m, 2H), 7.25 (s, 1H), 7.14 – 7.04 (m, 3H), 6.97 (dd, *J* = 8.8, 2.5 Hz, 1H), 6.83 (d, *J* = 2.5 Hz, 1H), 3.88 (s, 3H), 2.37 (s, 3H), 2.00 (s, 6H).

**<sup>13</sup>C NMR (125 MHz, CDCl<sub>3</sub>):** δ 201.5, 165.6, 163.3, 140.4, 133.4, 129.8, 129.3, 128.6, 128.4, 128.3, 127.9, 126.5, 126.4, 125.2, 117.5, 113.4, 106.2, 101.8, 55.6, 21.6, 20.1.

**HRMS (ESI):** C<sub>26</sub>H<sub>26</sub>NO<sub>4</sub>S [M+H]<sup>+</sup> calculated = 448.1577; found = 448.1580.

3l.

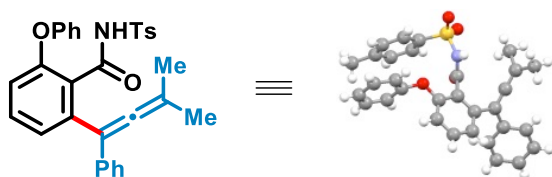

**2-(3-methyl-1-phenylbuta-1,2-dien-1-yl)-6-phenoxy-N-tosylbenzamide**

62 mg, 61%, yellow oil

**<sup>1</sup>H NMR (400 MHz, CDCl<sub>3</sub>):** δ 8.32 (s, 1H), 7.73 (d, *J* = 8.2 Hz, 2H), 7.36 – 7.23 (m, 5H), 7.22 – 7.12 (m, 4H), 7.02 (dd, *J* = 15.1, 7.9 Hz, 3H), 6.87 (d, *J* = 8.1 Hz, 2H), 6.72 (d, *J* = 8.3 Hz, 1H), 2.30 (s, 3H), 1.84 (s, 6H).

**<sup>13</sup>C NMR (100 MHz, CDCl<sub>3</sub>):** δ 202.8, 163.6, 155.8, 154.9, 144.6, 139.1, 137.7, 135.4, 131.4, 129.9, 129.3, 128.5, 128.4, 127.3, 126.8, 126.1, 125.6, 124.3, 119.6, 116.4, 103.9, 100.5, 21.7, 20.1.

**HRMS (ESI):** C<sub>31</sub>H<sub>28</sub>NO<sub>4</sub>S [M+H]<sup>+</sup> calculated = 510.1734; found = 510.1738.

3m.

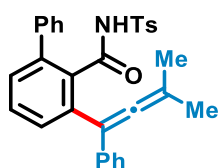

### 3-(3-methyl-1-phenylbuta-1,2-dien-1-yl)-*N*-tosyl-[1,1'-biphenyl]-2-carboxamide

71 mg, 72%, yellow oil

$^1\text{H NMR}$  (500 MHz,  $\text{CDCl}_3$ ):  $\delta$  9.07 (s, 1H), 7.91 (d,  $J = 7.5$  Hz, 1H), 7.84 (d,  $J = 8.2$  Hz, 3H), 7.60 (t,  $J = 6.8$  Hz, 3H), 7.49 (t,  $J = 7.6$  Hz, 1H), 7.42 (d,  $J = 7.6$  Hz, 1H), 7.32 (dd,  $J = 20.5$ , 10.2 Hz, 6H), 7.19 (d,  $J = 7.9$  Hz, 1H), 7.14 (s, 1H), 2.39 (s, 3H), 1.96 (s, 6H).

$^{13}\text{C NMR}$  (125 MHz,  $\text{CDCl}_3$ ):  $\delta$  202.0, 164.2, 157.8, 144.3, 135.9, 135.4, 135.1, 134.5, 132.9, 131.9, 131.0, 130.5, 129.5, 129.2, 128.8, 128.3, 128.2, 127.2, 126.3, 113.7, 106.5, 104.2, 21.6, 18.1.

**HRMS (ESI):**  $\text{C}_{31}\text{H}_{28}\text{NO}_3\text{S}$   $[\text{M}+\text{Na}]^+$  calculated = 494.1784; found = 494.1788.

3n.

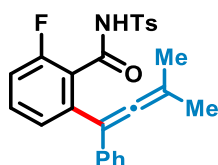

### 2-fluoro-6-(3-methyl-1-phenylbuta-1,2-dien-1-yl)-*N*-tosylbenzamide

54 mg, 62%, colourless oil

$^1\text{H NMR}$  (400 MHz,  $\text{CDCl}_3$ ):  $\delta$  8.24 (s, 1H), 7.82 (d,  $J = 8.3$  Hz, 2H), 7.46 – 7.43 (m, 2H), 7.32 (dd,  $J = 5.0$ , 1.9 Hz, 2H), 7.26 (d,  $J = 3.2$  Hz, 3H), 7.13 – 7.09 (m, 3H), 2.45 (s, 3H), 1.82 (s, 6H).

$^{13}\text{C NMR}$  (100 MHz,  $\text{CDCl}_3$ ):  $\delta$  202.7, 161.3, 159.9 (d,  $J_{\text{C-F}} = 252.2$  Hz), 137.4 (d,  $J_{\text{C-F}} = 7.8$  Hz), 132.3 (d,  $J_{\text{C-F}} = 3.1$  Hz), 130.2, 129.6, 129.5, 129.2, 128.9, 128.6, 126.9, 125.3, 117.9 (d,  $J_{\text{C-F}} = 4.4$  Hz), 116.4 (d,  $J_{\text{C-F}} = 18.8$  Hz), 115.1 (d,  $J_{\text{C-F}} = 21.7$  Hz), 101.0, 96.5, 21.8, 20.0.

**HRMS (ESI):**  $\text{C}_{25}\text{H}_{23}\text{FNO}_3\text{S}$   $[\text{M}+\text{H}]^+$  calculated = 436.1377; found = 436.1379.

3o.

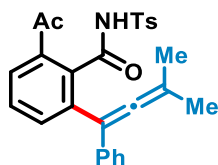

### 2-acetyl-6-(3-methyl-1-phenylbuta-1,2-dien-1-yl)-*N*-tosylbenzamide

52 mg, 57%, yellow oil

$^1\text{H NMR}$  (400 MHz,  $\text{CDCl}_3$ ):  $\delta$  7.96 (d,  $J = 8.4$  Hz, 2H), 7.62 (d,  $J = 7.6$  Hz, 1H), 7.57 – 7.51 (m, 1H), 7.37 (dd,  $J = 7.5$ , 0.9 Hz, 1H), 7.25 (d,  $J = 8.1$  Hz, 2H), 7.19 – 7.14 (m, 2H), 7.11 (s, 1H), 7.09 – 7.03 (m, 2H), 4.56 (s, 1H), 2.40 (s, 3H), 2.21 (s, 3H), 1.77 (s, 3H), 1.69 (s, 3H).

$^{13}\text{C}$  NMR (100 MHz,  $\text{CDCl}_3$ ):  $\delta$  204.9, 203.0, 163.2, 148.7, 144.8, 138.1, 137.7, 136.4, 134.1, 132.8, 129.4, 128.6, 128.3, 126.8, 126.4, 125.2, 121.1, 102.3, 99.9, 91.2, 29.2, 21.7, 19.9, 19.6.

HRMS (ESI):  $\text{C}_{27}\text{H}_{26}\text{NO}_4\text{S}$   $[\text{M}+\text{H}]^+$  calculated = 460.1577; found = 460.1568.

3p.

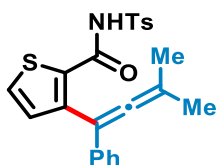

**3-(3-methyl-1-phenylbuta-1,2-dien-1-yl)-N-tosylthiophene-2-carboxamide**

27 mg, 32%, yellow oil

$^1\text{H}$  NMR (500 MHz,  $\text{CDCl}_3$ ):  $\delta$  9.25 (s, 1H), 7.94 – 7.90 (m, 1H), 7.81 (d,  $J$  = 8.3 Hz, 1H), 7.57 (dd,  $J$  = 7.5, 1.4 Hz, 1H), 7.53 (d,  $J$  = 6.6 Hz, 1H), 7.45 (td,  $J$  = 7.6, 1.2 Hz, 1H), 7.31 – 7.28 (m, 1H), 7.14 (d,  $J$  = 8.1 Hz, 2H), 7.12 – 7.08 (m, 2H), 6.94 – 6.90 (m, 2H), 2.42 (s, 3H), 1.95 (s, 6H).

$^{13}\text{C}$  NMR (125 MHz,  $\text{CDCl}_3$ ):  $\delta$  202.1, 164.5, 145.0, 133.3, 133.2, 132.0, 130.6, 129.8, 129.4, 129.0, 128.8, 128.3, 127.6, 126.6, 105.1, 102.0, 21.8, 20.2.

HRMS (ESI):  $\text{C}_{23}\text{H}_{22}\text{NO}_3\text{S}_2$   $[\text{M}+\text{H}]^+$  calculated = 424.1036; found = 424.1037.

3r.

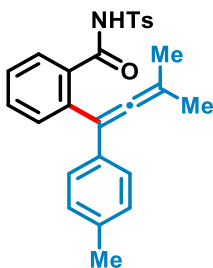

**2-(3-methyl-1-(p-tolyl)buta-1,2-dien-1-yl)-N-tosylbenzamide**

70 mg, 82%, colourless oil

$^1\text{H}$  NMR (500 MHz,  $\text{CDCl}_3$ ):  $\delta$  9.48 (s, 1H), 7.99 (d,  $J$  = 7.7 Hz, 1H), 7.63 – 7.39 (m, 4H), 7.34 (d,  $J$  = 7.4 Hz, 1H), 7.16 – 6.89 (m, 6H), 2.39 (s, 3H), 2.37 (s, 3H), 1.96 (s, 6H).

$^{13}\text{C}$  NMR (126 MHz,  $\text{CDCl}_3$ ):  $\delta$  201.6, 164.5, 144.5, 137.4, 136.0, 135.3, 133.4, 133.1, 132.1, 131.2, 130.8, 129.8, 129.3, 128.5, 128.5, 126.5, 105.7, 101.5, 21.8, 21.3, 20.3.

HRMS (ESI):  $\text{C}_{26}\text{H}_{26}\text{NO}_3\text{S}$   $[\text{M}+\text{H}]^+$  calculated = 432.1628; found = 432.1627.

3s.

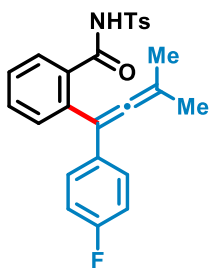

**2-(1-(4-fluorophenyl)-3-methylbuta-1,2-dien-1-yl)-N-tosylbenzamide**

69 mg, 80%, yellow oil

**<sup>1</sup>H NMR (500 MHz, CDCl<sub>3</sub>):** δ 9.31 (s, 1H), 7.95 (d, *J* = 7.8 Hz, 1H), 7.59 (dd, *J* = 4.8, 3.5 Hz, 3H), 7.49 (d, *J* = 7.6 Hz, 1H), 7.33 (d, *J* = 7.5 Hz, 1H), 7.16 (d, *J* = 8.2 Hz, 2H), 7.00 (dd, *J* = 8.7, 5.3 Hz, 2H), 6.87 (t, *J* = 8.6 Hz, 2H), 2.41 (s, 3H), 1.97 (s, 6H).

**<sup>13</sup>C NMR (125 MHz, CDCl<sub>3</sub>):** δ 201.9, 164.5, 162.3 (d, *J*<sub>C-F</sub> = 247.6 Hz), 144.9, 135.6, 133.2, 132.3 (d, *J*<sub>C-F</sub> = 3.1 Hz), 132.0, 131.4, 130.6, 129.4, 128.7, 128.4, 128.1 (d, *J*<sub>C-F</sub> = 8.1 Hz), 115.9 (d, *J*<sub>C-F</sub> = 21.8 Hz), 105.1, 101.8, 21.7, 20.3.

**HRMS (ESI):** C<sub>25</sub>H<sub>23</sub>FNO<sub>3</sub>S [M+H]<sup>+</sup> calculated = 436.1377; found = 436.1381.

3t.

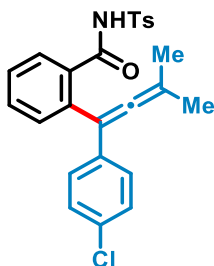

**2-(1-(4-chlorophenyl)-3-methylbuta-1,2-dien-1-yl)-N-tosylbenzamide**

55 mg, 61%, yellow oil

**<sup>1</sup>H NMR (500 MHz, CDCl<sub>3</sub>):** δ <sup>1</sup>H NMR (400 MHz, CDCl<sub>3</sub>) δ 9.23 (s, 1H), 7.92 (d, *J* = 7.8 Hz, 1H), 7.57 – 7.52 (m, 2H), 7.46 (t, *J* = 7.6 Hz, 1H), 7.30 (s, 2H), 7.12 (m, 3H), 6.92 (d, *J* = 8.4 Hz, 1H), 2.43 (s, 3H), 1.95 (s, 6H).

**<sup>13</sup>C NMR (125 MHz, CDCl<sub>3</sub>):** δ 202.1, 164.5, 145.0, 143.8, 139.2, 135.3, 134.9, 133.2, 132.0, 130.6, 129.9, 129.4, 129.0, 128.4, 127.6, 126.6, 105.1, 102.1, 21.7, 20.2.

**HRMS (ESI):** C<sub>25</sub>H<sub>23</sub>ClNO<sub>3</sub>S [M+H]<sup>+</sup> calculated = 452.1082; found = 452.1087.

3u.

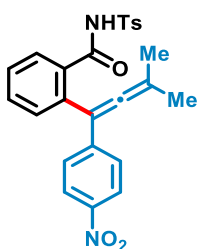

**2-(1-(4-nitrophenyl)-3-methylbuta-1,2-dien-1-yl)-N-tosylbenzamide**

56 mg, 62%, yellow oil

**<sup>1</sup>H NMR (500 MHz, CDCl<sub>3</sub>):** δ 9.55 (s, 1H), 8.01 (d, *J* = 8.8 Hz, 1H), 7.82 (d, *J* = 8.2 Hz, 1H), 7.39 (d, *J* = 8.2 Hz, 2H), 7.33 (d, *J* = 8.1 Hz, 1H), 7.26 – 7.21 (m, 3H), 7.11 – 7.08 (m, 1H), 7.06 (d, *J* = 8.3 Hz, 1H), 6.95 (dd, *J* = 8.8, 2.5 Hz, 1H), 6.81 (d, *J* = 2.5 Hz, 1H), 2.35 (s, 3H), 1.98 (s, 6H).

**<sup>13</sup>C NMR (125 MHz, CDCl<sub>3</sub>):** δ 201.9, 163.5, 144.7, 143.5, 139.1, 139.0, 137.5, 134.9, 132.1, 131.7, 129.7, 129.0, 128.3, 127.5, 126.4, 126.3, 104.8, 102.3, 21.5, 20.0.

**HRMS (ESI):** C<sub>25</sub>H<sub>23</sub>N<sub>2</sub>O<sub>5</sub>S [M+H]<sup>+</sup> calculated = 463.1322; found = 463.1325.

3v.

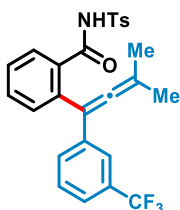

**2-(3-methyl-1-(3-(trifluoromethyl)phenyl)buta-1,2-dien-1-yl)-N-tosylbenzamide**

70 mg, 73%, yellow oil

**<sup>1</sup>H NMR (400 MHz, CDCl<sub>3</sub>):** δ 9.05 (s, 1H), 7.88 (d, *J* = 7.5 Hz, 1H), 7.81 (d, *J* = 8.2 Hz, 2H), 7.57 (s, 2H), 7.47 (t, *J* = 7.6 Hz, 1H), 7.39 (d, *J* = 7.6 Hz, 1H), 7.30 (s, 3H), 7.16 (d, *J* = 7.9 Hz, 1H), 7.11 (s, 1H), 2.37 (s, 3H), 1.94 (s, 6H).

**<sup>13</sup>C NMR (100 MHz, CDCl<sub>3</sub>):** δ 202.8, 164.7, 145.1, 144.0, 139.4, 136.6 (q, *J*<sub>C-F</sub> = 253.0 Hz), 135.2, 133.3, 132.2, 130.6, 129.9 (q, *J*<sub>C-F</sub> = 41.3 Hz), 129.5, 129.0, 128.5, 126.8, 124.1 (q, *J*<sub>C-F</sub> = 3.8 Hz), 123.1 (q, *J*<sub>C-F</sub> = 3.8 Hz), 105.1, 102.5, 21.9, 20.3.

**HRMS (ESI):** C<sub>26</sub>H<sub>23</sub>F<sub>3</sub>NO<sub>3</sub>S [M+H]<sup>+</sup> calculated = 486.1345; found = 486.1347.

3w.

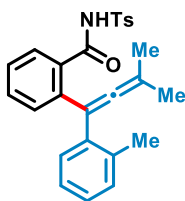

**2-(3-methyl-1-(o-tolyl)buta-1,2-dien-1-yl)-N-tosylbenzamide**

70 mg, 82%, colourless oil

**<sup>1</sup>H NMR (400 MHz, CDCl<sub>3</sub>):** δ 8.77 (s, 1H), 7.67 (s, 2H), 7.41 (m, 2H), 7.28 – 6.93 (m, 7H), 6.68 (d, *J* = 6.7 Hz, 1H), 2.41 (s, 6H), 1.84 (s, 6H).

**<sup>13</sup>C NMR (100 MHz, CDCl<sub>3</sub>):** δ 198.7, 164.4, 144.5, 136.6, 136.0, 135.3, 134.3, 133.1, 132.6, 132.2, 130.7, 129.4, 129.1, 128.5, 128.4, 127.3, 126.4, 108.8, 108.5, 105.5, 27.6, 26.0, 21.7.

**HRMS (ESI):** C<sub>26</sub>H<sub>26</sub>NO<sub>3</sub>S [M+H]<sup>+</sup> calculated = 432.1628; found = 432.1635.

3x.

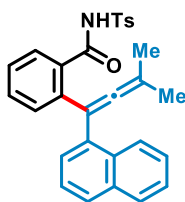

**2-(3-methyl-1-(naphthalen-1-yl)buta-1,2-dien-1-yl)-N-tosylbenzamide**

70 mg, 75%, colourless oil

**<sup>1</sup>H NMR (400 MHz, CDCl<sub>3</sub>):** δ 9.26 (s, 1H), 7.95 (d, *J* = 7.8 Hz, 1H), 7.84 (d, *J* = 8.1 Hz, 3H), 7.60 – 7.54 (m, 2H), 7.49 (d, *J* = 7.6 Hz, 1H), 7.33 (t, *J* = 7.4 Hz, 4H), 7.15 (dd, *J* = 15.9, 8.3 Hz, 3H), 6.95 (d, *J* = 8.4 Hz, 1H), 2.43 (s, 3H), 1.98 (s, 6H).

**<sup>13</sup>C NMR (100 MHz, CDCl<sub>3</sub>):** δ 202.7, 163.5, 155.7, 154.8, 144.4, 139.0, 138.3, 137.6, 135.3, 132.8, 131.2, 129.8, 129.2, 128.4, 128.3, 127.1, 126.7, 126.4, 125.5, 124.2, 119.4, 116.3, 103.8, 100.3, 21.5, 20.0.

**HRMS (ESI):** C<sub>29</sub>H<sub>26</sub>NO<sub>3</sub>S [M+H]<sup>+</sup> calculated = 468.1628; found = 468.1632.

3y.

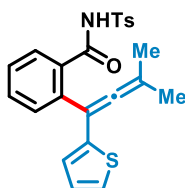

**2-(3-methyl-1-(thiophen-2-yl)buta-1,2-dien-1-yl)-N-tosylbenzamide**



49 mg, 58%, yellow oil

**<sup>1</sup>H NMR (400 MHz, CDCl<sub>3</sub>):** δ 9.25 (s, 1H), 7.98 – 7.87 (m, 1H), 7.81 (d, *J* = 8.3 Hz, 1H), 7.60 – 7.48 (m, 3H), 7.47 – 7.43 (m, 1H), 7.31 – 7.28 (m, 1H), 7.16 (s, 1H), 7.11 – 7.09 (m, 1H), 6.99 – 6.87 (m, 2H), 2.40 (s, 3H), 1.95 (s, 6H).

**<sup>13</sup>C NMR (100 MHz, CDCl<sub>3</sub>):** δ 202.1, 164.5, 145.0, 135.2, 134.9, 133.3, 133.2, 131.9, 130.6, 129.8, 129.4, 129.0, 128.8, 128.3, 127.6, 126.6, 105.1, 102.0, 21.8, 20.2.

**HRMS (ESI):** C<sub>23</sub>H<sub>22</sub>NO<sub>3</sub>S<sub>2</sub> [M+H]<sup>+</sup> calculated = 424.1036; found = 424.1035.

**3z.**

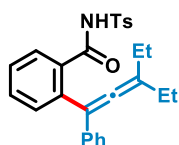

**2-(3-ethyl-1-phenylpenta-1,2-dien-1-yl)-N-tosylbenzamide**

69 mg, 78%, colourless oil

**<sup>1</sup>H NMR (400 MHz, CDCl<sub>3</sub>):** δ 9.47 (s, 1H), 8.00 (d, *J* = 7.6 Hz, 1H), 7.56 (d, *J* = 7.1 Hz, 1H), 7.42 (m, 4H), 7.23 (s, 3H), 7.09 (d, *J* = 7.1 Hz, 4H), 2.37 (s, 3H), 2.25 (m, 4H), 1.20 (t, *J* = 7.2 Hz, 6H).

**<sup>13</sup>C NMR (100 MHz, CDCl<sub>3</sub>):** δ 201.5, 164.4, 144.5, 136.6, 135.9, 135.3, 133.2, 132.1, 140.0, 130.9, 129.4, 129.1, 128.5, 128.4, 127.4, 126.1, 114.5, 109.1, 26.2, 21.7, 13.0.

**HRMS (ESI):** C<sub>27</sub>H<sub>28</sub>NO<sub>3</sub>S [M+H]<sup>+</sup> calculated = 446.1784; found = 446.1788.

**3aa.**

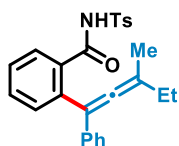

**2-(3-methyl-1-phenylpenta-1,2-dien-1-yl)-N-tosylbenzamide**

67 mg, 78%, colourless oil

**<sup>1</sup>H NMR (400 MHz, CDCl<sub>3</sub>):** δ 9.49 (s, 1H), 7.98 (dd, *J* = 7.8, 1.1 Hz, 1H), 7.57 (td, *J* = 7.5, 1.3 Hz, 1H), 7.46 (dd, *J* = 7.7, 1.1 Hz, 1H), 7.43 (d, *J* = 8.3 Hz, 2H), 7.34 (d, *J* = 7.6 Hz, 1H), 7.25 – 7.19 (m, 3H), 7.07 (dd, *J* = 7.3, 3.4 Hz, 4H), 2.36 (s, 3H), 2.22 (qd, *J* = 15.7, 7.9 Hz, 2H), 1.96 (s, 3H), 1.19 (t, *J* = 7.4 Hz, 3H).

**<sup>13</sup>C NMR (100 MHz, CDCl<sub>3</sub>):** δ 201.6, 164.4, 144.6, 136.5, 135.9, 135.2, 133.2, 132.1, 131.0, 130.9, 129.4, 129.1, 128.6, 128.4, 127.5, 126.3, 108.1, 107.6, 27.64, 21.76, 18.62, 12.69.

**HRMS (ESI):** C<sub>26</sub>H<sub>26</sub>NO<sub>3</sub>S [M+H]<sup>+</sup> calculated = 432.1628; found = 432.1633.

3ab.

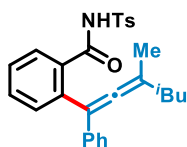

**2-(3,4-dimethyl-1-phenylhexa-1,2-dien-1-yl)-N-tosylbenzamide**

70 mg, 77%, colourless oil

**<sup>1</sup>H NMR (400 MHz, CDCl<sub>3</sub>):** δ 9.49 (s, 1H), 7.98 (d, *J* = 6.9 Hz, 1H), 7.55 (dd, *J* = 7.5, 1.1 Hz, 1H), 7.50 – 7.39 (m, 3H), 7.33 (d, *J* = 7.5 Hz, 1H), 7.25 – 7.18 (m, 3H), 7.12 – 7.00 (m, 4H), 2.35 (s, 3H), 2.19 – 2.03 (m, 2H), 1.93 (s, 3H), 1.91 – 1.84 (m, 1H), 0.99 (d, *J* = 6.6 Hz, 3H), 0.91 (d, *J* = 6.6 Hz, 3H).

**<sup>13</sup>C NMR (100 MHz, CDCl<sub>3</sub>):** δ 202.3, 164.4, 144.6, 136.3, 135.8, 135.2, 134.7, 133.2, 132.1, 130.9, 129.4, 129.1, 128.6, 128.4, 127.4, 126.4, 106.1, 104.9, 43.8, 26.6, 22.9, 22.7, 21.8, 18.5.

**HRMS (ESI):** C<sub>28</sub>H<sub>30</sub>NO<sub>3</sub>S [M+H]<sup>+</sup> calculated = 460.1941; found = 460.1947.

3ac.

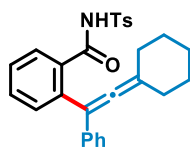

**2-(2-cyclohexylidene-1-phenylvinyl)-N-tosylbenzamide**

70 mg, 77%, colourless oil

**<sup>1</sup>H NMR (400 MHz, CDCl<sub>3</sub>):** δ 9.45 (s, 1H), 7.96 (d, *J* = 7.7 Hz, 1H), 7.55 (d, *J* = 7.5 Hz, 1H), 7.45 (dd, *J* = 7.2, 5.4 Hz, 3H), 7.31 (d, *J* = 7.6 Hz, 1H), 7.26 – 7.20 (m, 3H), 7.13 – 7.00 (m, 4H), 2.47 – 2.38 (m, 2H), 2.36 (s, 3H), 2.32 – 2.23 (m, 2H), 1.75 – 1.73 (m, 2H).

**<sup>13</sup>C NMR (100 MHz, CDCl<sub>3</sub>):** δ 198.7, 164.5, 144.6, 136.6, 136.1, 135.3, 133.1, 132.2, 130.8, 129.4, 129.1, 128.5, 128.4, 127.4, 126.4, 108.8, 108.5, 105.6, 31.1, 27.7, 26.1, 21.8.

**HRMS (ESI):** C<sub>28</sub>H<sub>28</sub>NO<sub>3</sub>S [M+H]<sup>+</sup> calculated = 458.1784; found = 458.1787.

3ad.

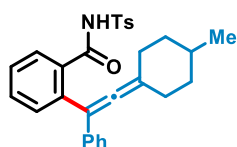

**2-(2-(4-methylcyclohexylidene)-1-phenylvinyl)-N-tosylbenzamide**

64 mg, 68%, colourless oil

**<sup>1</sup>H NMR (400 MHz, CDCl<sub>3</sub>):** δ 9.44 (s, 1H), 7.94 (dd, *J* = 7.8, 1.0 Hz, 1H), 7.54 (dd, *J* = 7.5, 1.3 Hz, 1H), 7.48 – 7.41 (m, 3H), 7.33 – 7.29 (m, 1H), 7.23 (dd, *J* = 5.8, 4.2 Hz, 3H), 7.14 – 7.02 (m, 4H), 2.55 (m, 2H), 2.36 (s, 3H), 2.15 (m, 2H), 1.98 – 1.89 (m, 2H), 1.31 – 1.26 (m, 3H), 1.01 (d, *J* = 6.5 Hz, 3H).

**<sup>13</sup>C NMR (100 MHz, CDCl<sub>3</sub>):** δ 198.5, 164.5, 144.5, 136.5, 135.8, 135.2, 133.0, 132.2, 131.2, 130.6, 129.3, 129.1, 128.4, 128.4, 127.3, 126.3, 108.0, 105.5, 36.0, 32.2, 30.6, 22.2, 21.7.

**HRMS (ESI):** C<sub>29</sub>H<sub>30</sub>NO<sub>3</sub>S [M+H]<sup>+</sup> calculated = 472.1941; found = 472.1943.

**3ae.**

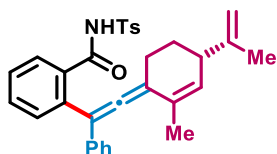

**2-(2-methyl-4-(prop-1-en-2-yl)cyclohex-2-en-1-ylidene)-1-phenylvinyl-N-tosylbenzamide**

66 mg, 65%, colourless oil

**<sup>1</sup>H NMR (400 MHz, CDCl<sub>3</sub>):** δ 9.38 (s, 1H), 7.97 (d, *J* = 7.7 Hz, 1H), 7.71 – 7.48 (m, 2H), 7.53 – 7.41 (m, 3H), 7.37 (d, *J* = 7.5 Hz, 1H), 7.32 – 7.18 (m, 3H), 7.14 – 7.04 (m, 3H), 5.79 (d, *J* = 4.5 Hz, 1H), 4.81 (s, 2H), 2.83 (d, *J* = 10.6 Hz, 1H), 2.48-2.31 (m, 5H), 2.10 (m, 1H), 1.91 (s, 3H), 1.81 (s, 3H), 1.62 (m, 1H).

**<sup>13</sup>C NMR (100 MHz, CDCl<sub>3</sub>):** δ 203.8, 164.3, 148.2, 144.6, 136.1, 135.4, 135.3, 133.2, 132.1, 131.2, 130.9, 129.4, 129.2, 128.7, 128.5, 128.4, 128.2, 127.7, 126.5, 109.9, 109.5, 109.3, 41.2, 32.5, 31.2, 21.8, 21.1, 21.0.

**HRMS (ESI):** C<sub>32</sub>H<sub>32</sub>NO<sub>3</sub>S [M+H]<sup>+</sup> calculated = 510.2097; found = 510.2101.

**3af.**

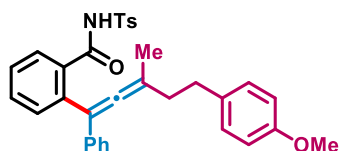

**(S)-2-(5-(4-methoxyphenyl)-3-methyl-1-phenylpenta-1,2-dien-1-yl)-N-tosylbenzamide**

74 mg, 69%, colourless oil

**<sup>1</sup>H NMR (400 MHz, CDCl<sub>3</sub>):** δ 9.12 (s, 1H), 7.91 (d, *J* = 7.3 Hz, 1H), 7.53 (t, *J* = 7.0 Hz, 1H), 7.43 (m, 3H), 7.18 (m, 4H), 7.07 (m, 4H), 6.87 (d, *J* = 6.5 Hz, 2H), 6.68 (d, *J* = 8.5 Hz, 2H), 3.75 (s, 3H), 2.84 (d, *J* = 7.1 Hz, 2H), 2.54 (t, *J* = 7.2 Hz, 2H), 2.35 (s, 3H), 1.98 (s, 3H).

$^{13}\text{C}$  NMR (100 MHz,  $\text{CDCl}_3$ ):  $\delta$  202.1, 164.4, 157.9, 144.4, 136.0, 135.5, 135.2, 134.3, 133.0, 132.0, 131.1, 130.6, 129.6, 129.3, 128.9, 128.4, 128.3, 127.3, 126.4, 113.9, 106.6, 104.3, 55.2, 36.4, 32.6, 21.7, 18.2.

HRMS (ESI):  $\text{C}_{33}\text{H}_{32}\text{NO}_4\text{S}$   $[\text{M}+\text{H}]^+$  calculated = 538.2047; found = 538.2055.

3ag.

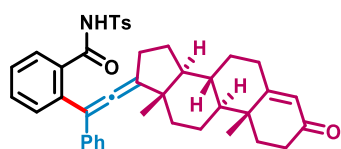

2-((S)-2-((8R,9S,10R,13S,14S)-10,13-dimethyl-3-oxo-1,2,3,6,7,8,9,10,11,12,13,14,15,16-tetradecahydro-17H-cyclopenta[a]phenanthren-17-ylidene)-1-phenylvinyl)-N-tosylbenzamide

81 mg, 63%, colourless oil

$^1\text{H}$  NMR (500 MHz,  $\text{CDCl}_3$ ):  $\delta$  9.53 (s, 1H), 8.01 (d,  $J = 7.8$  Hz, 1H), 7.83 (d,  $J = 8.0$  Hz, 1H), 7.58 (t,  $J = 7.4$  Hz, 1H), 7.47 (t,  $J = 7.6$  Hz, 1H), 7.42 (s, 1H), 7.33 (d,  $J = 7.7$  Hz, 1H), 7.26 – 7.19 (m, 3H), 7.08 (d,  $J = 8.0$  Hz, 4H), 5.79 (s, 1H), 2.79 (d,  $J = 7.5$  Hz, 2H), 2.46 – 2.35 (m, 7H), 2.12 – 1.95 (m, 5H), 1.71 – 1.47 (m, 7H), 1.24 (s, 5H), 0.98 (s, 3H).

$^{13}\text{C}$  NMR (125 MHz,  $\text{CDCl}_3$ ):  $\delta$  199.7, 196.2, 171.0, 164.4, 144.5, 136.2, 135.8, 135.1, 133.1, 132.1, 131.0, 130.8, 129.3, 129.0, 128.5, 128.3, 127.4, 126.0, 124.0, 118.5, 110.3, 55.3, 53.8, 47.0, 38.8, 36.2, 35.7, 34.0, 32.8, 31.9, 27.1, 25.0, 21.7, 21.1, 18.5, 17.4.

HRMS (ESI):  $\text{C}_{41}\text{H}_{44}\text{NO}_4\text{S}$   $[\text{M}+\text{H}]^+$  calculated = 646.2986; found = 646.2990.

(f) Procedure for base assisted annulation of allenylated benzamides

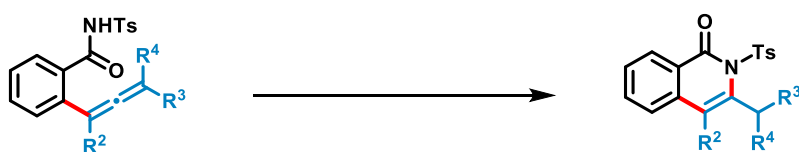

To a mixture of allene **3** (0.15 mmol, 1 eq) in toluene, was added 0.5 eq  $\text{K}_2\text{CO}_3$  and was heated in a preheated oil bath at 50 °C for 12 h. The crude reaction mixture was evaporated under reduced pressure and was directly purified by silica gel column chromatography (Hexane:EA = 10:1). ( $R_f$  values from 0.7-0.8 in hexane: EA = 9:1).

4a.

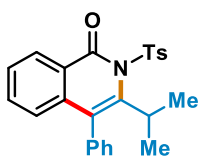

**3-isopropyl-4-phenyl-2-tosylisoquinolin-1(2H)-one**

45 mg, 73%, colourless oil

$^1\text{H NMR}$  (500 MHz,  $\text{CDCl}_3$ ):  $\delta$  8.42 (d,  $J = 8.0$  Hz, 1H), 8.03 (d,  $J = 8.1$  Hz, 2H), 7.59 (d,  $J = 7.3$  Hz, 1H), 7.55 – 7.43 (m, 4H), 7.36 (d,  $J = 8.0$  Hz, 2H), 7.27 – 7.22 (m, 2H), 6.97 (d,  $J = 8.1$  Hz, 1H), 2.75 (sep,  $J = 6.9$  Hz, 1H), 2.46 (s, 3H), 1.23 (d,  $J = 6.9$  Hz, 6H).

$^{13}\text{C NMR}$  (125 MHz,  $\text{CDCl}_3$ ):  $\delta$  160.3, 158.6, 140.1, 137.2, 135.2, 133.6, 130.4, 129.5, 129.2, 128.9, 128.6, 128.2, 127.0, 125.1, 124.3, 120.4, 116.3, 30.4, 21.7, 20.3.

**HRMS (ESI):**  $\text{C}_{25}\text{H}_{24}\text{NO}_3\text{S}$   $[\text{M}+\text{H}]^+$  calculated = 418.1471; found = 418.1467.

4b.

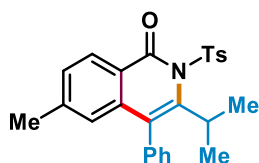

**3-isopropyl-6-methyl-4-phenyl-2-tosylisoquinolin-1(2H)-one**

47 mg, 74%, yellow oil

$^1\text{H NMR}$  (400 MHz,  $\text{CDCl}_3$ ):  $\delta$  8.29 (d,  $J = 8.2$  Hz, 1H), 8.00 (d,  $J = 8.1$  Hz, 2H), 7.73 – 7.65 (m, 1H), 7.48 (t,  $J = 6.7$  Hz, 3H), 7.32 (d,  $J = 8.0$  Hz, 2H), 7.25 – 7.20 (m, 2H), 6.69 (s, 1H), 2.67 (sep,  $J = 6.9$  Hz, 1H), 2.43 (s, 3H), 2.32 (s, 3H), 1.18 (d,  $J = 6.9$  Hz, 6H).

$^{13}\text{C NMR}$  (100 MHz,  $\text{CDCl}_3$ ):  $\delta$  160.5, 158.7, 146.7, 142.8, 140.3, 137.3, 133.7, 130.4, 129.7, 129.5, 129.2, 129.0, 128.5, 126.9, 125.0, 118.0, 116.3, 30.4, 22.3, 21.7, 20.3.

**HRMS (ESI):**  $\text{C}_{26}\text{H}_{26}\text{NO}_3\text{S}$   $[\text{M}+\text{H}]^+$  calculated = 432.1628; found = 432.1632.

4c.

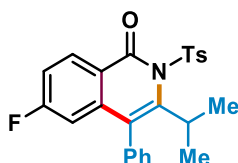

**6-fluoro-3-isopropyl-4-phenyl-2-tosylisoquinolin-1(2H)-one**

45 mg, 70%, colourless oil

**<sup>1</sup>H NMR (400 MHz, CDCl<sub>3</sub>):** δ 8.41 (dd, *J* = 8.9, 5.7 Hz, 1H), 7.99 (d, *J* = 8.1 Hz, 2H), 7.50 (q, *J* = 5.6 Hz, 3H), 7.33 (d, *J* = 8.1 Hz, 2H), 7.25 – 7.16 (m, 2H), 7.12 (d, *J* = 2.3 Hz, 1H), 6.57 (dd, *J* = 9.8, 2.3 Hz, 1H), 2.72 (sep, *J* = 6.9 Hz, 1H), 2.44 (s, 3H), 1.21 (d, *J* = 6.9 Hz, 6H).  
**<sup>13</sup>C NMR (100 MHz, CDCl<sub>3</sub>):** δ 167.1 (d, *J*<sub>C-F</sub> = 257.5 Hz), 159.9, 143.1, 139.9, 133.0, 132.3 (d, *J*<sub>C-F</sub> = 9.3 Hz), 130.2, 129.5 (d, *J*<sub>C-F</sub> = 8.0 Hz), 128.9, 127.0, 116.6, 111.05 (d, *J*<sub>C-F</sub> = 23.8 Hz), 30.5, 21.7, 20.3.

**HRMS (ESI):** C<sub>25</sub>H<sub>23</sub>FNO<sub>3</sub>S [M+H]<sup>+</sup> calculated = 436.1377; found = 436.1380.

**4d.**

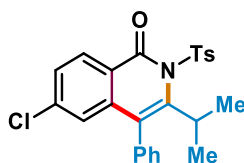

**6-chloro-3-isopropyl-4-phenyl-2-tosylisoquinolin-1(2H)-one**

46 mg, 68%, pale yellow oil

**<sup>1</sup>H NMR (500 MHz, CDCl<sub>3</sub>):** δ 8.32 (d, *J* = 8.6 Hz, 1H), 8.01 (d, *J* = 8.2 Hz, 2H), 7.69 (s, 1H), 7.53 (d, *J* = 7.3 Hz, 3H), 7.43 – 7.38 (m, 1H), 7.36 (d, *J* = 8.1 Hz, 1H), 7.23 (dd, *J* = 7.6, 1.6 Hz, 2H), 6.91 (d, *J* = 1.9 Hz, 1H), 2.72 (sep, *J* = 6.9 Hz, 1H), 2.46 (s, 3H), 1.23 (d, *J* = 6.9 Hz, 6H).

**<sup>13</sup>C NMR (125 MHz, CDCl<sub>3</sub>):** δ 160.0, 159.4, 143.2, 142.2, 139.8, 138.6, 132.8, 130.5, 130.3, 129.5, 129.5, 128.9, 128.7, 127.0, 124.7, 118.8, 115.5, 30.5, 21.7, 20.3.

**HRMS (ESI):** C<sub>25</sub>H<sub>23</sub>ClNO<sub>3</sub>S [M+H]<sup>+</sup> calculated = 452.1082; found = 452.1080.

**4e.**

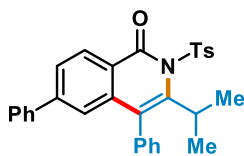

**3-isopropyl-4,6-diphenyl-2-tosylisoquinolin-1(2H)-one**

53 mg, 72%, brown oil

**<sup>1</sup>H NMR (400 MHz, CDCl<sub>3</sub>):** δ 8.46 (d, *J* = 8.3 Hz, 1H), 8.02 (d, *J* = 7.9 Hz, 2H), 7.68 (dd, *J* = 19.6, 8.0 Hz, 2H), 7.51 – 7.39 (m, 8H), 7.27 (d, *J* = 3.7 Hz, 3H), 7.11 (s, 1H), 2.73 (sep, *J* = 6.8 Hz, 1H), 2.44 (s, 3H), 1.21 (d, *J* = 6.8 Hz, 6H).

$^{13}\text{C}$  NMR (100 MHz,  $\text{CDCl}_3$ ):  $\delta$  160.0, 158.9, 147.9, 142.7, 140.0, 139.4, 137.6, 133.4, 130.2, 129.4, 129.3, 129.1, 128.9, 128.7, 128.4, 127.3, 127.1, 126.8, 123.0, 119.1, 116.3, 30.3, 21.5, 20.1.

HRMS (ESI):  $\text{C}_{31}\text{H}_{28}\text{NO}_3\text{S}$   $[\text{M}+\text{H}]^+$  calculated = 494.1784; found = 494.1787.

4f.

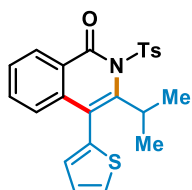

**3-isopropyl-4-(thiophen-2-yl)-2-tosylisoquinolin-1(2H)-one**

47 mg, 75%, colourless oil

$^1\text{H}$  NMR (500 MHz,  $\text{CDCl}_3$ ):  $\delta$  8.41 (d,  $J$  = 8.0 Hz, 1H), 8.02 (d,  $J$  = 8.1 Hz, 2H), 7.71 (dd,  $J$  = 10.6, 7.6 Hz, 1H), 7.61 (d,  $J$  = 7.5 Hz, 1H), 7.50 (s, 1H), 7.47 (t,  $J$  = 7.7 Hz, 2H), 7.36 (d,  $J$  = 8.1 Hz, 1H), 7.20 (d,  $J$  = 8.2 Hz, 1H), 6.94 (d,  $J$  = 8.0 Hz, 1H), 2.72 (sep,  $J$  = 6.9 Hz, 1H), 2.46 (s, 3H), 1.24 (d,  $J$  = 6.9 Hz, 6H).

$^{13}\text{C}$  NMR (125 MHz,  $\text{CDCl}_3$ ):  $\delta$  160.0, 158.7, 143.0, 139.9, 136.7, 135.2, 134.7, 132.0, 131.7, 129.5, 129.4, 129.0, 128.3, 126.9, 124.7, 120.3, 115.2, 30.4, 21.6, 20.3.

HRMS (ESI):  $\text{C}_{23}\text{H}_{22}\text{NO}_3\text{S}_2$   $[\text{M}+\text{H}]^+$  calculated = 424.1036; found = 424.1038.

4g.

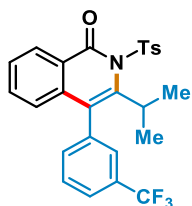

**3-isopropyl-2-tosyl-4-(3-(trifluoromethyl)phenyl)isoquinolin-1(2H)-one**

46 mg, 64%, yellow oil

$^1\text{H}$  NMR (400 MHz,  $\text{CDCl}_3$ ):  $\delta$  8.40 (d,  $J$  = 7.9 Hz, 1H), 8.00 (d,  $J$  = 8.1 Hz, 2H), 7.68 (d,  $J$  = 8.5 Hz, 3H), 7.51 (s, 1H), 7.48-7.43 (m, 2H), 7.34 (d,  $J$  = 8.1 Hz, 2H), 6.85 (d,  $J$  = 8.0 Hz, 1H), 2.63 (sep,  $J$  = 6.7 Hz, 1H), 2.44 (s, 3H), 1.24 (d,  $J$  = 7.0 Hz, 6H).

$^{13}\text{C}$  NMR (100 MHz,  $\text{CDCl}_3$ ):  $\delta$  159.8, 159.0, 143.1, 135.4, 135.3, 135.2, 135.2 (q,  $J_{\text{C-F}}$  = 265.8), 134.6, 131.5, 131.4 (q,  $J_{\text{C-F}}$  = 3.0 Hz), 129.9, 129.5, 129.1, 128.6 (q,  $J_{\text{C-F}}$  = 39.5 Hz), 128.5 (overlapped), 127.0, 124.6, 120.4, 119.7, 115.1, 30.6, 21.7, 20.3.

HRMS (ESI):  $\text{C}_{26}\text{H}_{23}\text{F}_3\text{NO}_3\text{S}$   $[\text{M}+\text{H}]^+$  calculated = 486.1345; found = 486.1348.

4h.

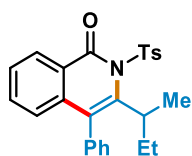

**3-(sec-butyl)-4-phenyl-2-tosylisoquinolin-1(2H)-one**

45 mg, 70 %, colourless oil

**<sup>1</sup>H NMR (400 MHz, CDCl<sub>3</sub>):** δ 8.41 (d, *J* = 8.1 Hz, 1H), 7.99 (d, *J* = 8.0 Hz, 2H), 7.69 (s, 1H), 7.58 (t, *J* = 7.6 Hz, 1H), 7.47 (t, *J* = 6.7 Hz, 3H), 7.32 (d, *J* = 7.9 Hz, 2H), 7.21 (t, *J* = 6.9 Hz, 2H), 6.93 (d, *J* = 8.0 Hz, 1H), 2.43 (s, 3H), 1.74 (m, 1H), 1.50 – 1.38 (m, 2H), 1.18 (d, *J* = 6.9 Hz, 3H), 0.75 (t, *J* = 7.4 Hz, 3H).

**<sup>13</sup>C NMR (100 MHz, CDCl<sub>3</sub>):** δ 160.1, 157.6, 142.7, 137.0, 135.1, 133.5, 130.6, 130.3, 129.3, 129.1, 129.0, 128.8, 128.4, 128.0, 126.8, 124.9, 117.5, 37.2, 27.2, 21.5, 18.6, 12.2.

**HRMS (ESI):** C<sub>26</sub>H<sub>26</sub>NO<sub>3</sub>S [M+H]<sup>+</sup> calculated = 432.1628; found = 432.1625.

4i.

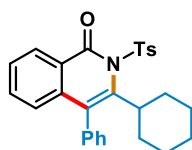

**3-cyclohexyl-4-phenyl-2-tosylisoquinolin-1(2H)-one**

45 mg, 67%, yellow oil

**<sup>1</sup>H NMR (400 MHz, CDCl<sub>3</sub>):** δ 8.42 (d, *J* = 8.0 Hz, 1H), 8.01 (d, *J* = 8.2 Hz, 2H), 7.72 – 7.66 (m, 1H), 7.57 (t, *J* = 7.7 Hz, 1H), 7.49 – 7.45 (m, 3H), 7.33 (d, *J* = 8.2 Hz, 2H), 7.20 (d, *J* = 5.5 Hz, 2H), 6.93 (d, *J* = 8.0 Hz, 1H), 2.58 (m, 1H), 2.43 (s, 3H), 1.67 (m, 6H), 1.05 (t, *J* = 7.2 Hz, 4H).

**<sup>13</sup>C NMR (100 MHz, CDCl<sub>3</sub>):** δ 160.3, 158.4, 142.9, 140.2, 137.3, 135.2, 133.6, 130.3, 129.5, 129.2, 129.0, 128.6, 128.2, 127.0, 125.1, 120.30, 116.7, 46.3, 40.2, 29.9, 25.9, 25.4, 21.7.

**HRMS (ESI):** C<sub>28</sub>H<sub>28</sub>NO<sub>3</sub>S [M+H]<sup>+</sup> calculated = 458.1784; found = 458.1791.

4j.

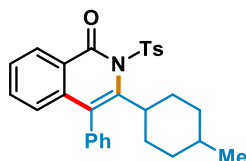

**3-(4-methylcyclohexyl)-4-phenyl-2-tosylisoquinolin-1(2H)-one**



45 mg, 64%, yellow oil

$^1\text{H NMR}$  (400 MHz,  $\text{CDCl}_3$ ):  $\delta$  8.34 (d,  $J = 8.0$  Hz, 1H), 8.01 (d,  $J = 8.1$  Hz, 2H), 7.56 (t,  $J = 7.5$  Hz, 1H), 7.48 (t,  $J = 10.1$  Hz, 3H), 7.40 (t,  $J = 7.7$  Hz, 1H), 7.32 (d,  $J = 7.9$  Hz, 2H), 7.23 (d,  $J = 7.5$  Hz, 2H), 6.94 (d,  $J = 8.0$  Hz, 1H), 2.44 (s, 3H), 2.34 (m, 1H), 2.20 – 2.04 (m, 2H), 1.59 (m, 4H), 1.43 (m, 3H), 1.15 (d,  $J = 7.2$  Hz, 3H).

$^{13}\text{C NMR}$  (100 MHz,  $\text{CDCl}_3$ ):  $\delta$  160.3, 158.5, 142.8, 140.2, 137.3, 135.0, 133.7, 130.4, 129.4, 129.2, 128.8, 128.5, 128.0, 126.9, 125.1, 120.3, 116.5, 40.5, 31.2, 26.7, 24.5, 21.7, 17.5.

HRMS (ESI):  $\text{C}_{29}\text{H}_{30}\text{NO}_3\text{S}$   $[\text{M}+\text{H}]^+$  calculated = 472.1941; found = 472.1944.

### (g) Procedure for Gram Scale Reaction to synthesize 3a

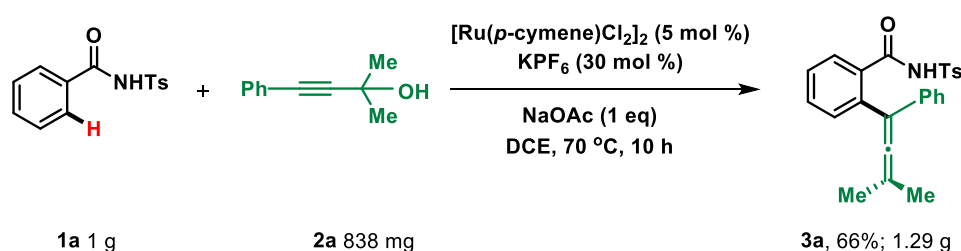

To an oven dried screw cap reaction tube equipped with a magnetic stir bar, was added *N*-Tosylbenzamide (1g, 4.7 mmol),  $[\text{Ru}(p\text{-cymene})\text{Cl}_2]_2$  (145 mg, 0.2 mmol),  $\text{KPF}_6$  (262.86 mg, 1.4 mmol), NaOAc (390 mg, 4.7 mmol) and propargyl alcohol (838 mg, 5.2 mmol) followed by 6 ml DCE. After heating the reaction mixture at 70 °C for 8-10 h, it was cooled to room temperature and the solvent was evaporated under reduced pressure. The residue was purified by silica gel column chromatography (mesh 100-200; hexane: ethyl acetate 95:5 to 80:20) to give 1.29 g of the product **3a**.

### (h) Procedure for Pd/C Assisted Hydrogenation of 3a to obtain 5

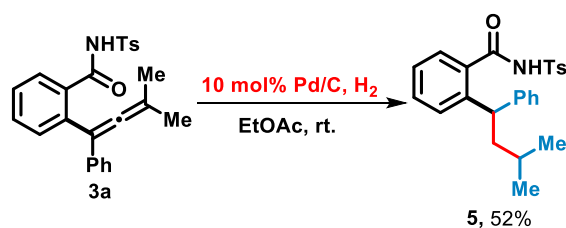

A mixture of product **3a** (42 mg, 0.1 mmol) and Pd/C (35 mg, 0.01 mmol) was taken in a 25 ml round bottom flask. 10 ml ethyl acetate was added and  $\text{H}_2$  gas was passed through the setup for 12 hours. The reaction was checked for complete conversion by TLC and product **5** was purified using silica gel column chromatography (EA: Hexane = 1:10).

5.

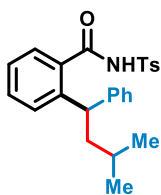

### 2-(3-methyl-1-phenylbutyl)-*N*-tosylbenzamide

22 mg, 52%, white oil,  $R_f = 0.8$  in hexane:EA = 4:1

$^1\text{H NMR}$  (500 MHz, MeOD):  $\delta$  8.05 (d,  $J = 8.3$  Hz, 2H), 7.50 (d,  $J = 8.2$  Hz, 2H), 7.46 – 7.41 (m, 2H), 7.34 (d,  $J = 7.5$  Hz, 1H), 7.25 (d,  $J = 7.8$  Hz, 1H), 7.15 (t,  $J = 7.2$  Hz, 2H), 7.11 (d,  $J = 7.0$  Hz, 1H), 7.02 (d,  $J = 7.1$  Hz, 2H), 4.34 (t,  $J = 7.9$  Hz, 1H), 2.50 (s, 3H), 1.96 – 1.78 (m, 2H), 1.74 (dd,  $J = 13.8, 7.1$  Hz, 1H), 0.80 (d,  $J = 6.6$  Hz, 3H), 0.74 (d,  $J = 6.6$  Hz, 3H).

$^{13}\text{C NMR}$  (125 MHz,  $\text{CDCl}_3$ ):  $\delta$  166.70, 145.36, 144.36, 144.23, 135.72, 133.36, 131.75, 129.74, 128.89, 128.65, 128.46, 128.08, 127.31, 126.40, 126.27, 45.25, 43.24, 25.72, 22.64, 22.48.

HRMS (ESI):  $\text{C}_{25}\text{H}_{28}\text{NO}_3\text{S}$   $[\text{M}+\text{H}]^+$  calculated = 422.1784; found = 422.1786.

### (i) Procedure for Base Catalyzed Hydrolysis of **3a**

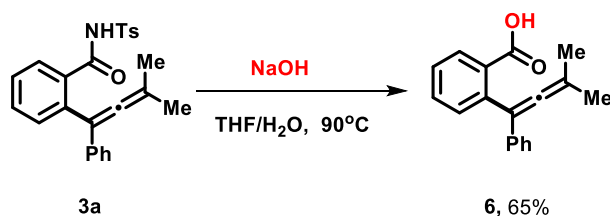

To a solution of **3a** (42 mg, 0.1 mmol) in THF (3 mL) was added a solution of NaOH (2M, 3 mL). The mixture was heated and stirred at 50 °C for 3 h, cooled to room temperature, acidified with a solution of HCl (3M) and extracted with ethyl acetate (2 x 15 mL). The combined organic layers were dried on  $\text{NaSO}_4$ , filtrated and evaporated. The crude product was purified by silica gel chromatography using hexane/EtOAc (7:3) as the eluent. **5** was obtained as white solid.

6.

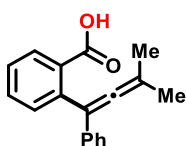

### 2-(3-methyl-1-phenylbuta-1,2-dien-1-yl)benzoic acid

17 mg, 65%, white oil, R<sub>f</sub> = 0.3 in Hexane:EA = 9:1

**IR (CHCl<sub>3</sub>):**  $\nu$  3429, 2967, 2932, 1975, 1735, 1601, 1447, 1314, 1258, 1103, 798, 763, 706 cm<sup>-1</sup>.

**<sup>1</sup>H NMR (500 MHz, CDCl<sub>3</sub>):**  $\delta$  8.17 – 8.12 (m, 2H), 7.91 (d, *J* = 7.6 Hz, 1H), 7.65 (dd, *J* = 10.8, 4.2 Hz, 2H), 7.51 (s, 1H), 7.45 (s, 1H), 7.35 (s, 1H), 7.31 (d, *J* = 7.0 Hz, 1H), 1.85 (s, 3H), 1.62 (s, 3H).

**<sup>13</sup>C NMR (125 MHz, CDCl<sub>3</sub>):**  $\delta$  202.8, 176.0, 138.5, 136.8, 134.8, 132.3, 130.8, 129.3, 129.1, 128.2, 127.7, 126.6, 125.5, 105.1, 99.4, 20.2.

**HRMS (ESI):** C<sub>18</sub>H<sub>16</sub>NaO<sub>2</sub> [M+Na]<sup>+</sup> calculated = 287.1043; found = 287.1041.

### (j) Procedure for Iodonium Induced Cyclization of Allenylated Product

According to the method of preparation based on preceding literature<sup>3</sup>, 1.2 equiv of *N*-iodosuccinimide was added to a solution of allenylated *N*-Tosylbenzamide **3a** (0.15 mmol, 1 equiv) in MeCN. The reaction mixture was stirred at room temperature for 30 minutes and checked for TLC. After completion of the reaction, the crude mixture was evaporated and directly subjected to column chromatography.

7.

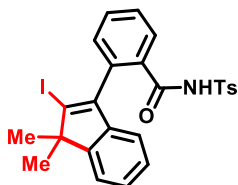

### 2-(2-iodo-1,1-dimethyl-1H-inden-3-yl)-N-tosylbenzamide

59 mg, 73%, yellow oil, R<sub>f</sub> = 0.7 in Hexane:EA = 4:1

**<sup>1</sup>H NMR (500 MHz, CDCl<sub>3</sub>):**  $\delta$  7.97 (d, *J* = 8.2 Hz, 2H), 7.91 (d, *J* = 7.6 Hz, 1H), 7.64 – 7.52 (m, 1H), 7.48 (t, *J* = 7.4 Hz, 1H), 7.43 (d, *J* = 7.8 Hz, 1H), 7.25 (dd, *J* = 7.1, 4.8 Hz, 4H), 7.13 (dd, *J* = 8.0, 1.4 Hz, 2H), 2.43 (s, 3H), 2.11 (s, 3H), 1.71 (s, 3H).

**<sup>13</sup>C NMR (125 MHz, CDCl<sub>3</sub>):**  $\delta$  153.7, 150.0, 143.4, 140.4, 138.8, 133.8, 129.9, 129.3, 129.1, 128.5, 127.9, 127.5, 126.0, 125.4, 125.1, 95.6, 35.4, 24.1, 21.7.

**HRMS (ESI):** C<sub>25</sub>H<sub>23</sub>INO<sub>3</sub>S [M+H]<sup>+</sup> calculated = 544.0438; found = 544.0441.

### (k) Procedure for Intermolecular Competitive Experiment

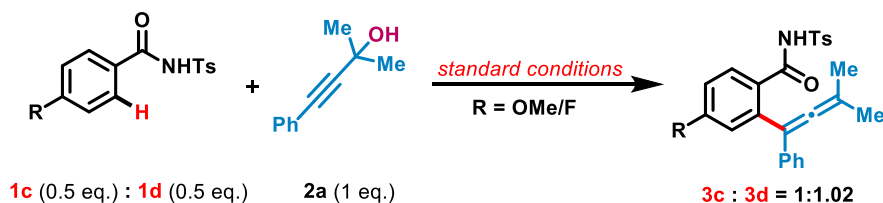

To an oven dried screw cap reaction tube equipped with a magnetic stir bar, was added **3c** 4-Methoxy-*N*-tosylbenzamide (18 mg, 0.06 mmol), **3d** 4-Fluoro-*N*-tosylbenzamide (17.6 mg, 0.06 mmol), [Ru(*p*-cymene)Cl<sub>2</sub>]<sub>2</sub> (3.7 mg, 0.006 mmol), KPF<sub>6</sub> (6.6 mg, 0.036 mmol), NaOAc (9.8 mg, 0.06 mmol) and 2-methyl-4-phenylbut-3-yn-2-ol (21.12 mg, 0.132 mmol) followed by 1 ml DCE. After heating the reaction mixture at 70 °C for 5 h, it was cooled to room temperature and the solvent was evaporated under reduced pressure. The residue was taken up for NMR analysis.

### (l) Procedure for H/D Exchange Experiment

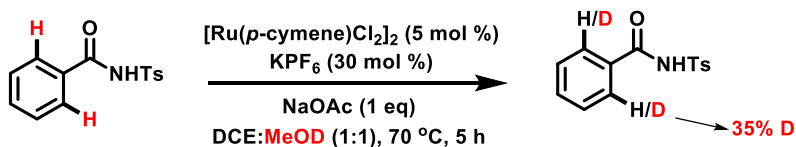

To an oven dried screw cap reaction tube equipped with a magnetic stir bar, was added *N*-Tosylbenzamide (27.5 mg, 0.1 mmol), [Ru(*p*-cymene)Cl<sub>2</sub>]<sub>2</sub> (3 mg, 0.005 mmol), KPF<sub>6</sub> (5.5 mg, 0.03 mmol) and NaOAc (8.2 mg, 0.1 mmol) followed by 1:1 DCE: MeOH-*d*<sub>4</sub>. After heating the reaction mixture at 70 °C for 5 h, it was cooled to room temperature and the solvent was evaporated under reduced pressure. The residue was taken up for NMR analysis.

### (m) Procedure for Kinetic Isotopic Experiments

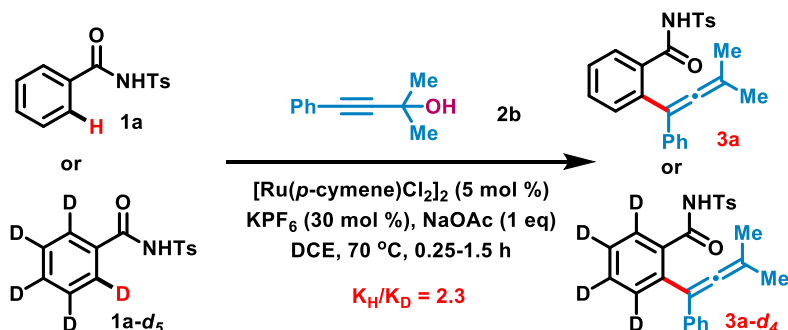

To an oven dried screw cap reaction tube equipped with a magnetic stir bar, 0.2 mmol of H<sub>5</sub>-benzamide was subjected to standard reaction conditions. After an equal interval of 15 minutes, reaction mixture was concentrated and directly taken for NMR analysis upto 1.5 hours.

Identical set of experiments were performed using D<sub>5</sub>-benzamide and NMR Analysis was carried out.

#### Studies for H<sub>5</sub>-Benzamide

| S.No. | Time (minutes) | Rate Conversion | Mmol of Product |
|-------|----------------|-----------------|-----------------|
| 1     | 15             | 0.04            | 0.008           |
| 2     | 30             | 0.09            | 0.018           |
| 3     | 45             | 0.17            | 0.034           |
| 4     | 60             | 0.205           | 0.041           |
| 5     | 75             | 0.24            | 0.048           |
| 6     | 90             | 0.315           | 0.063           |

#### Studies for D<sub>5</sub>-Benzamide

| S.No. | Time (minutes) | Rate Conversion | Mmol of Product |
|-------|----------------|-----------------|-----------------|
| 1     | 15             | 0.02            | 0.004           |
| 2     | 30             | 0.035           | 0.007           |
| 3     | 45             | 0.075           | 0.015           |
| 4     | 60             | 0.08            | 0.016           |
| 5     | 75             | 0.12            | 0.024           |
| 6     | 90             | 0.13            | 0.026           |

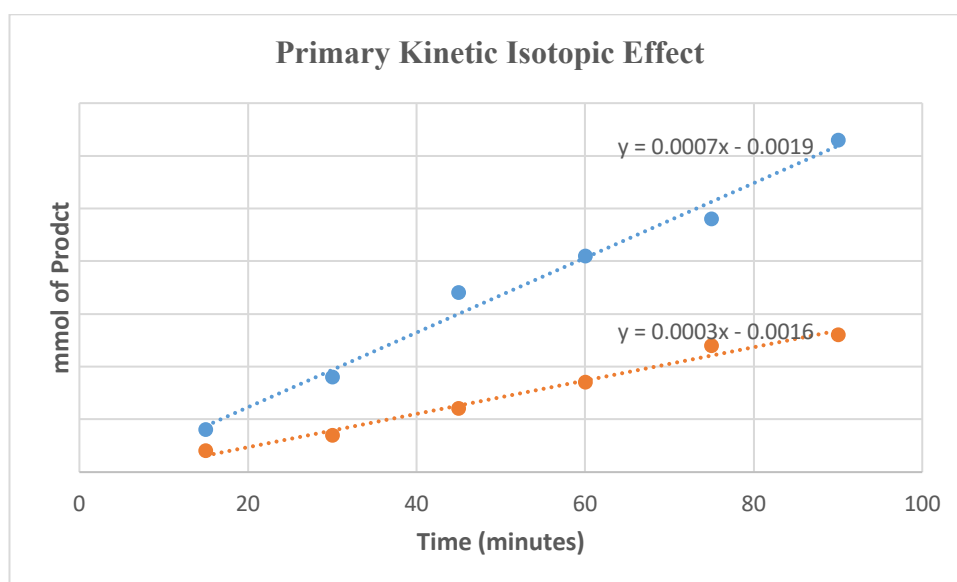

#### 4. References

1. L. Yang, S. Li, L. Cai, Y. Ding, L. Fu, Z. Cai, H. Ji and G. Li, *Org. Lett.* 2017, **19**, 2746.
2. (a) B. S. L. Collins, M. G. Suero and M. J. Gaunt, *Angew. Chem., Int. Ed.* 2013, **52**, 5799;  
(b) C. Ma, Y. Zhang, H. Zhang, J. Li, Y. Nishiyama, H. Tanimoto, T. Morimoto and K. Kakiuchi, *Synlett*, 2017, **28**, 560.
3. C. Grandclaudeon, V. Michelet and P. Y. Toullec, *Org. Lett.*, 2016, **18**, 676.

## 5. $^1\text{H}$ and $^{13}\text{C}$ NMR Spectra of Compounds

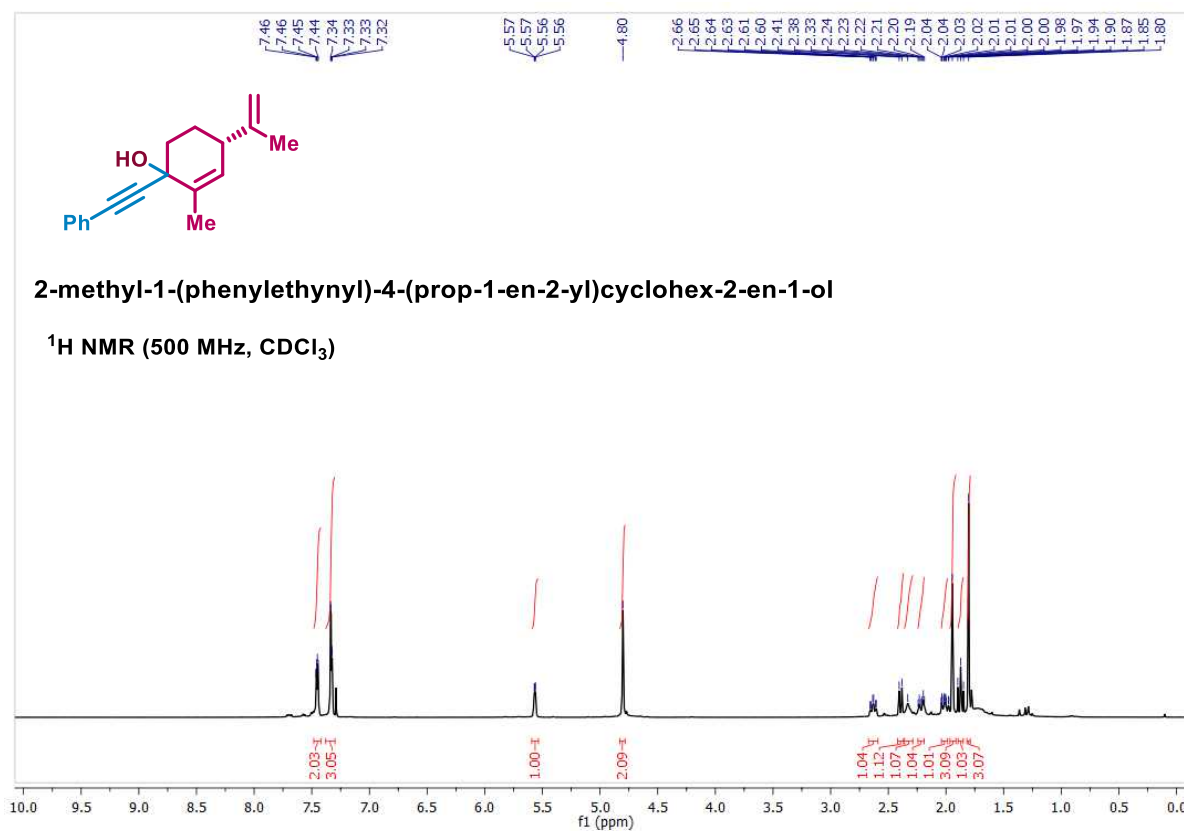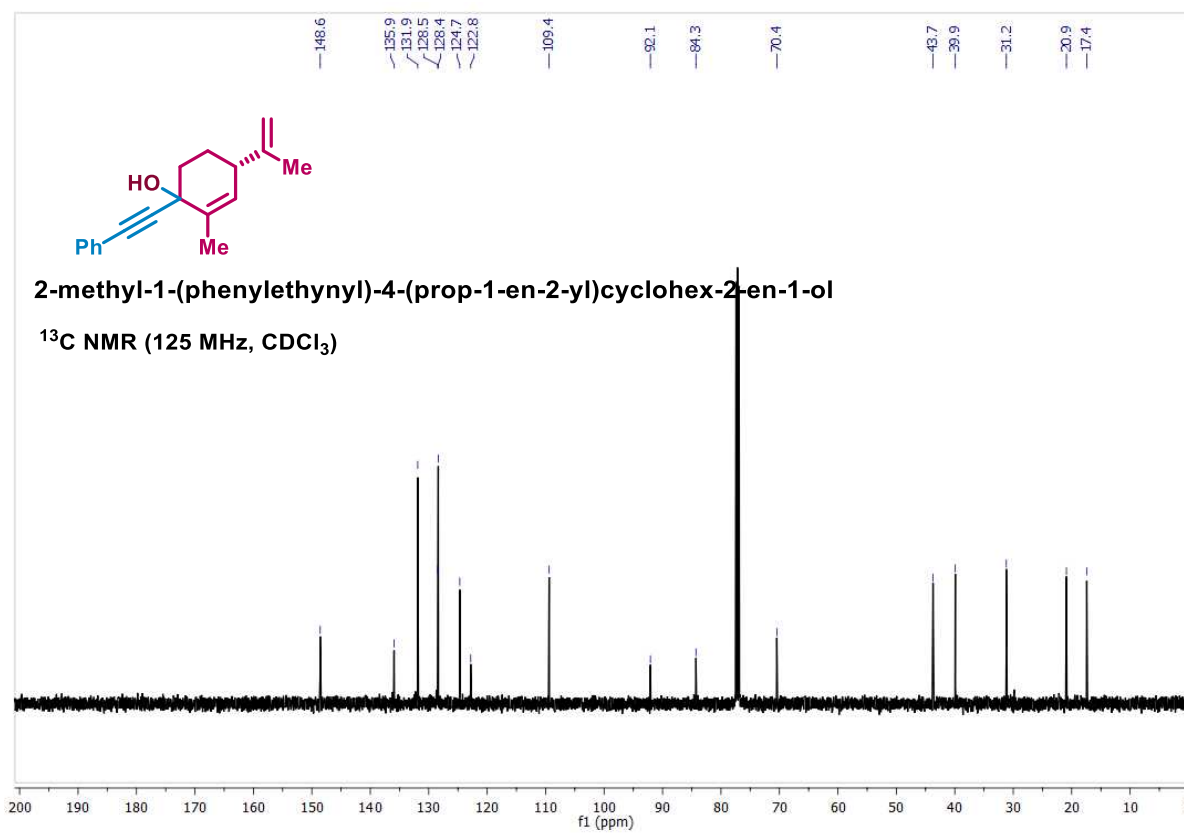

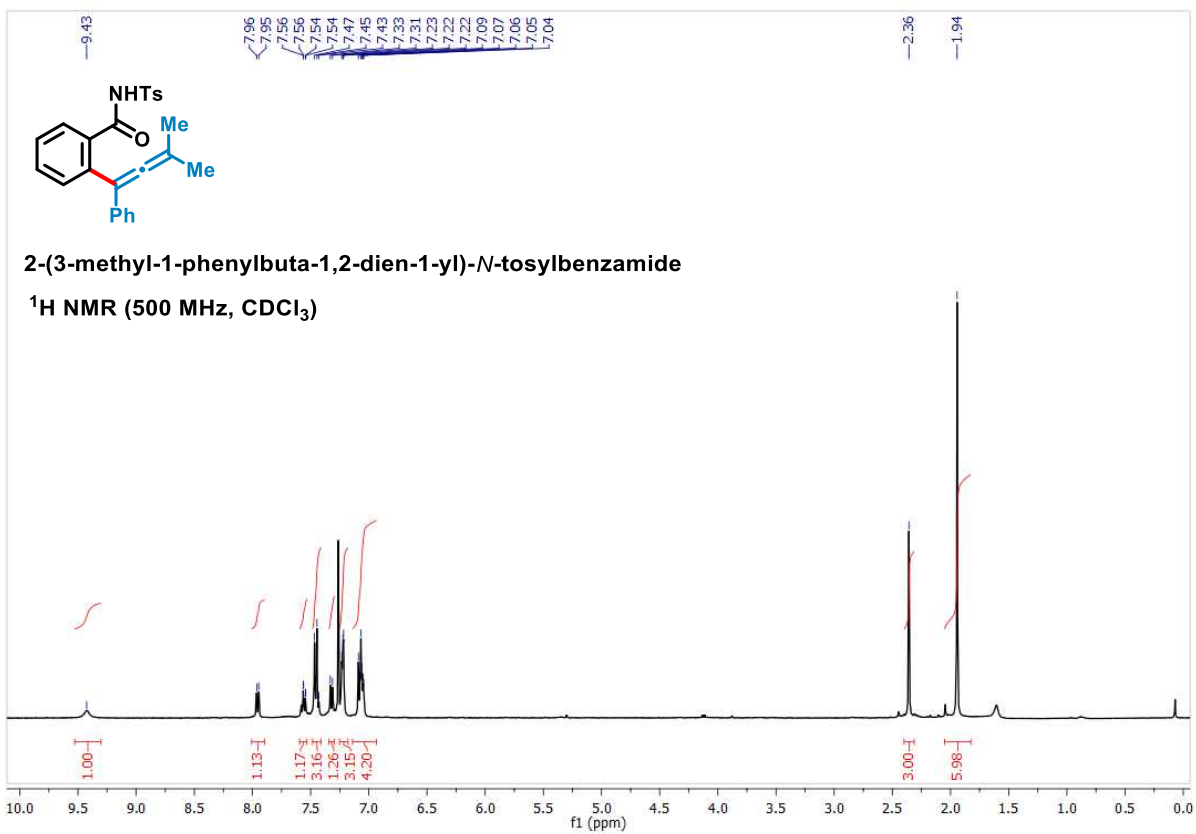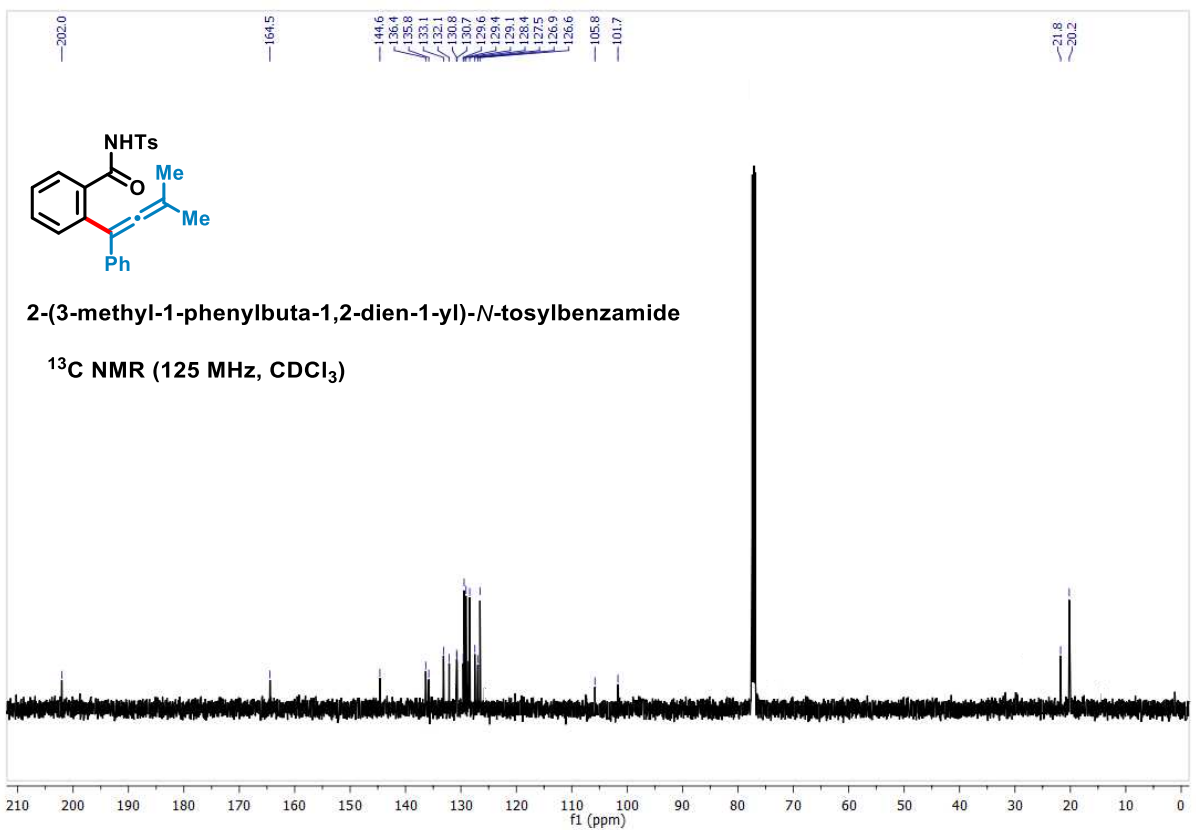



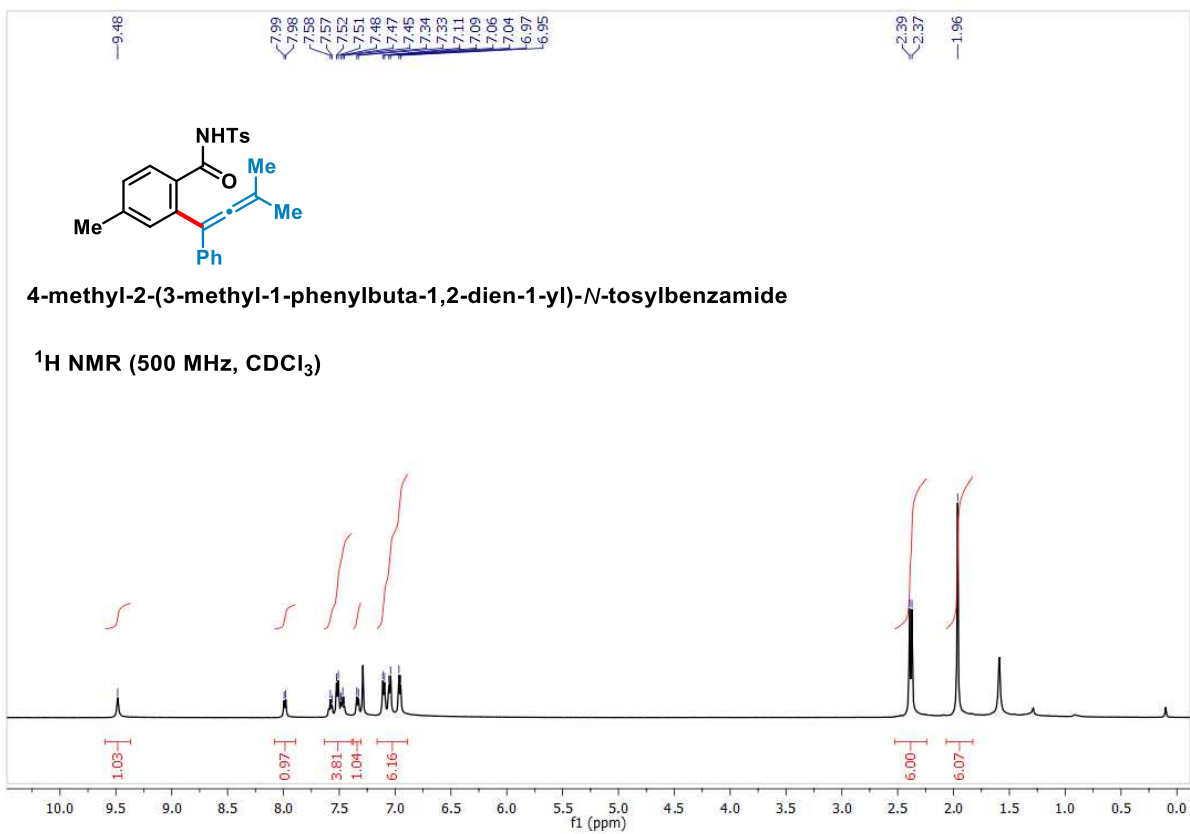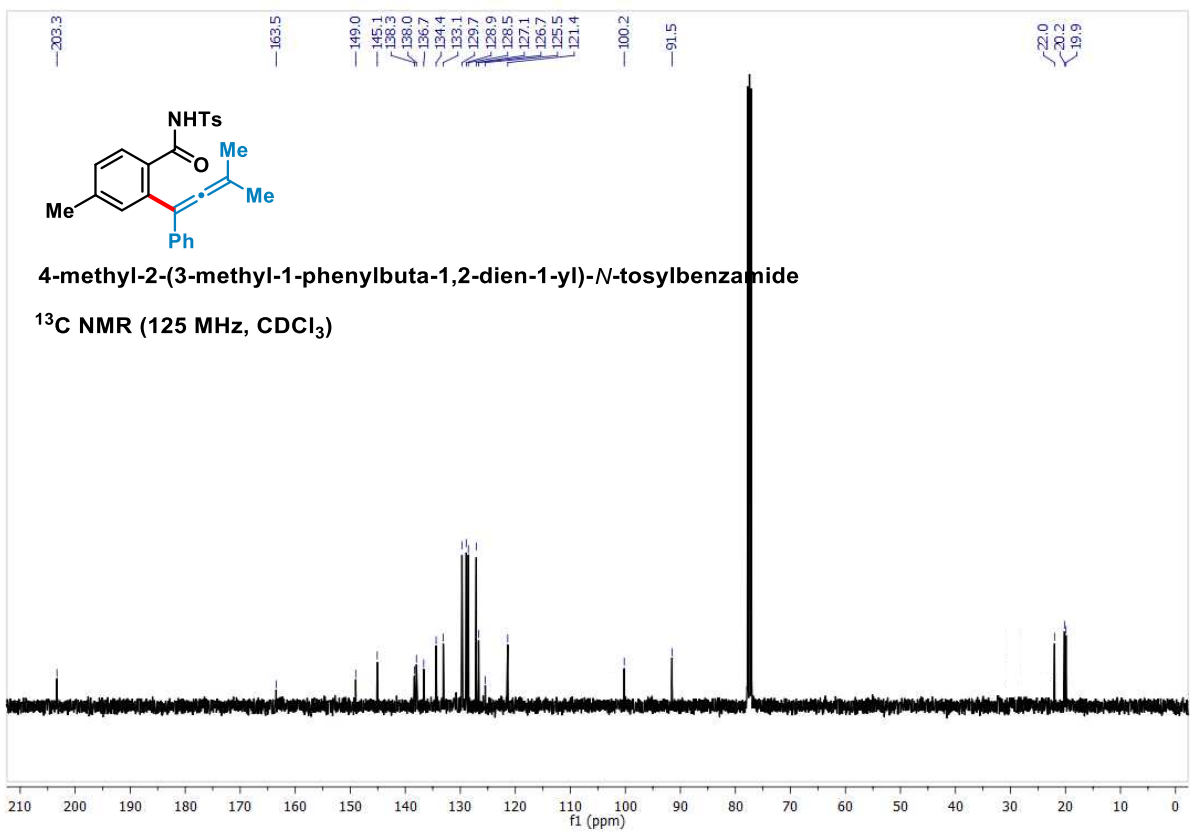

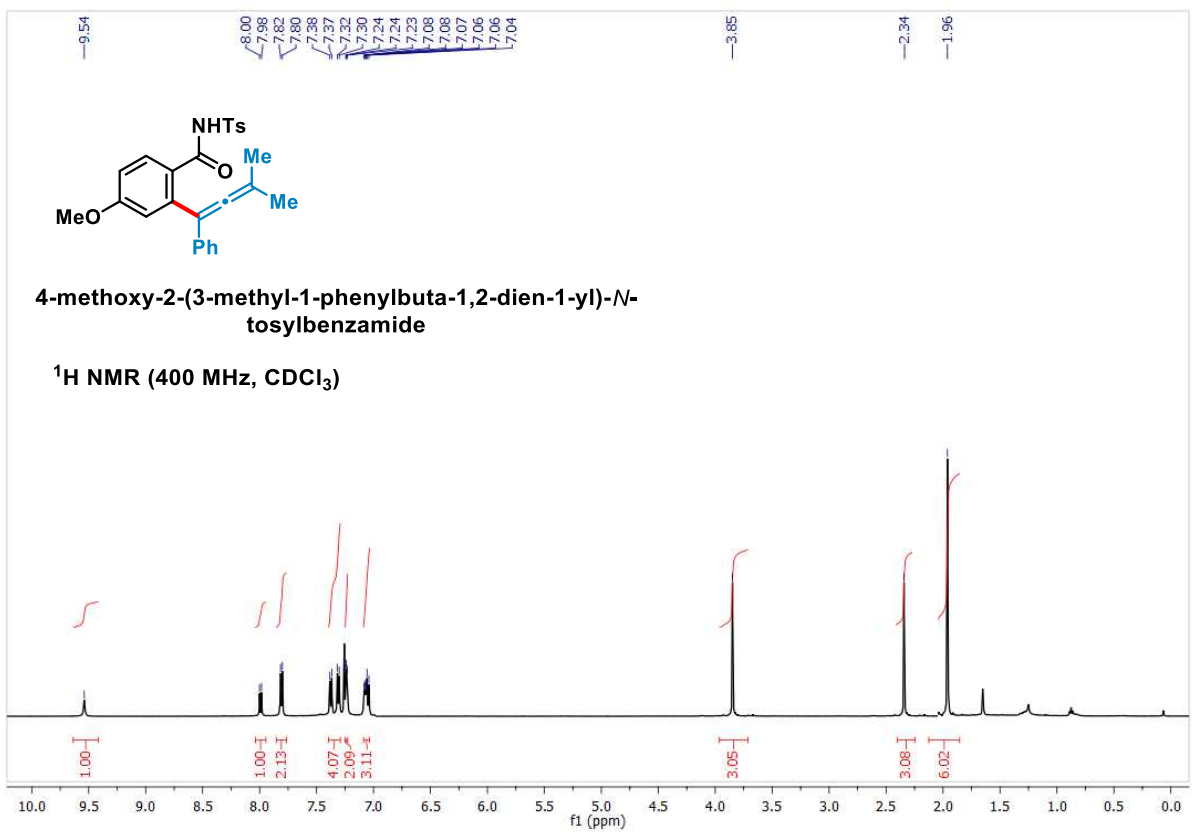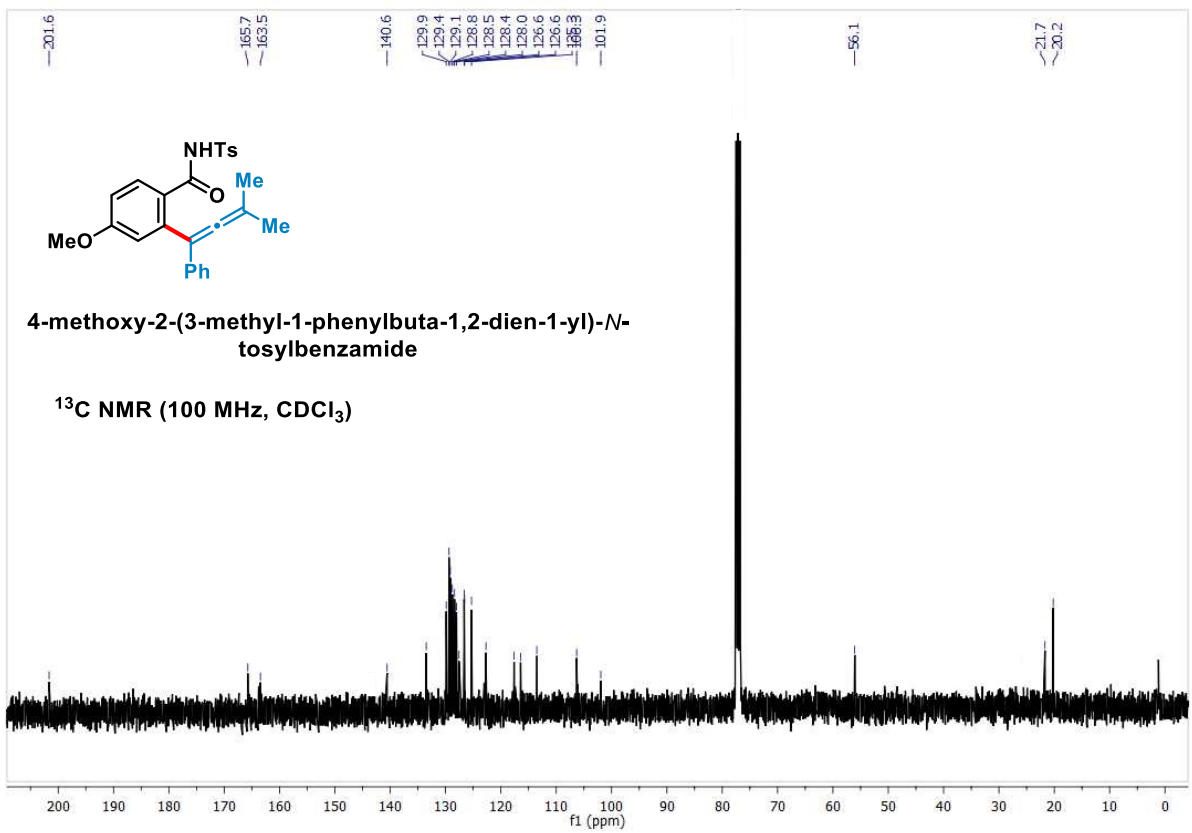

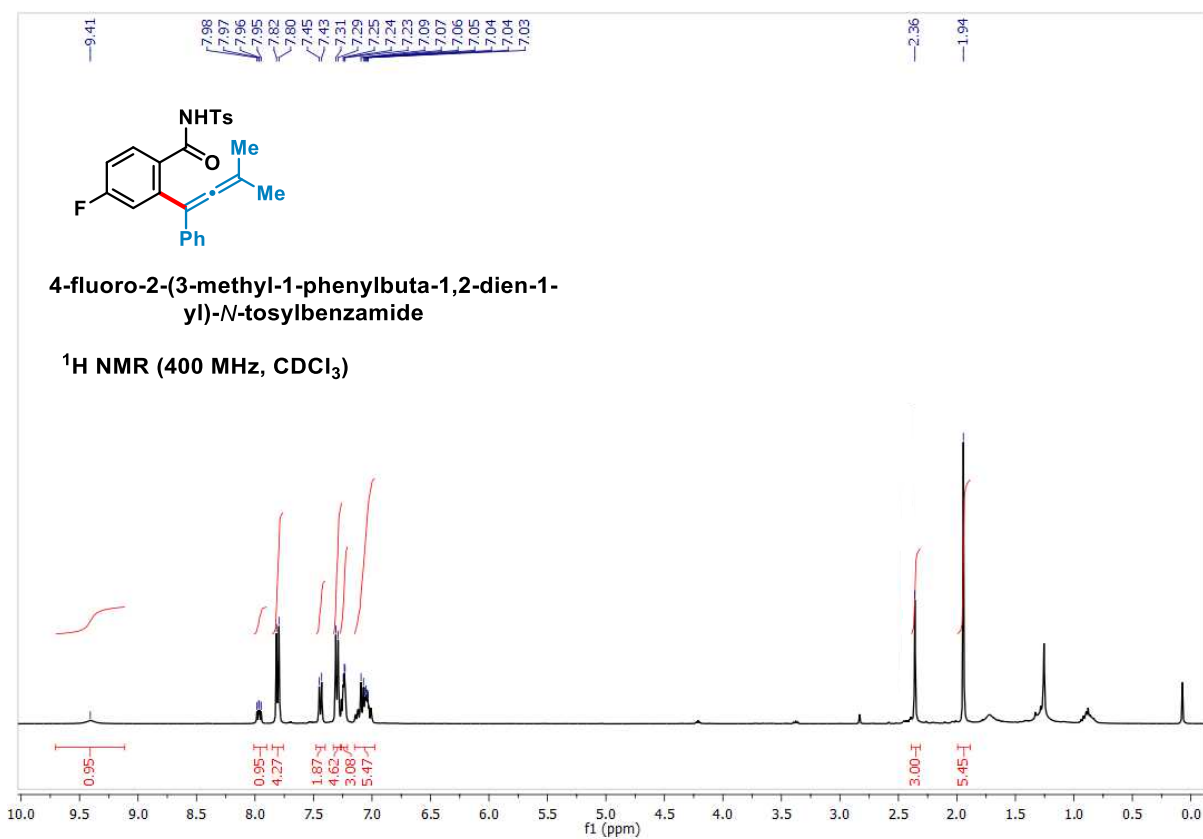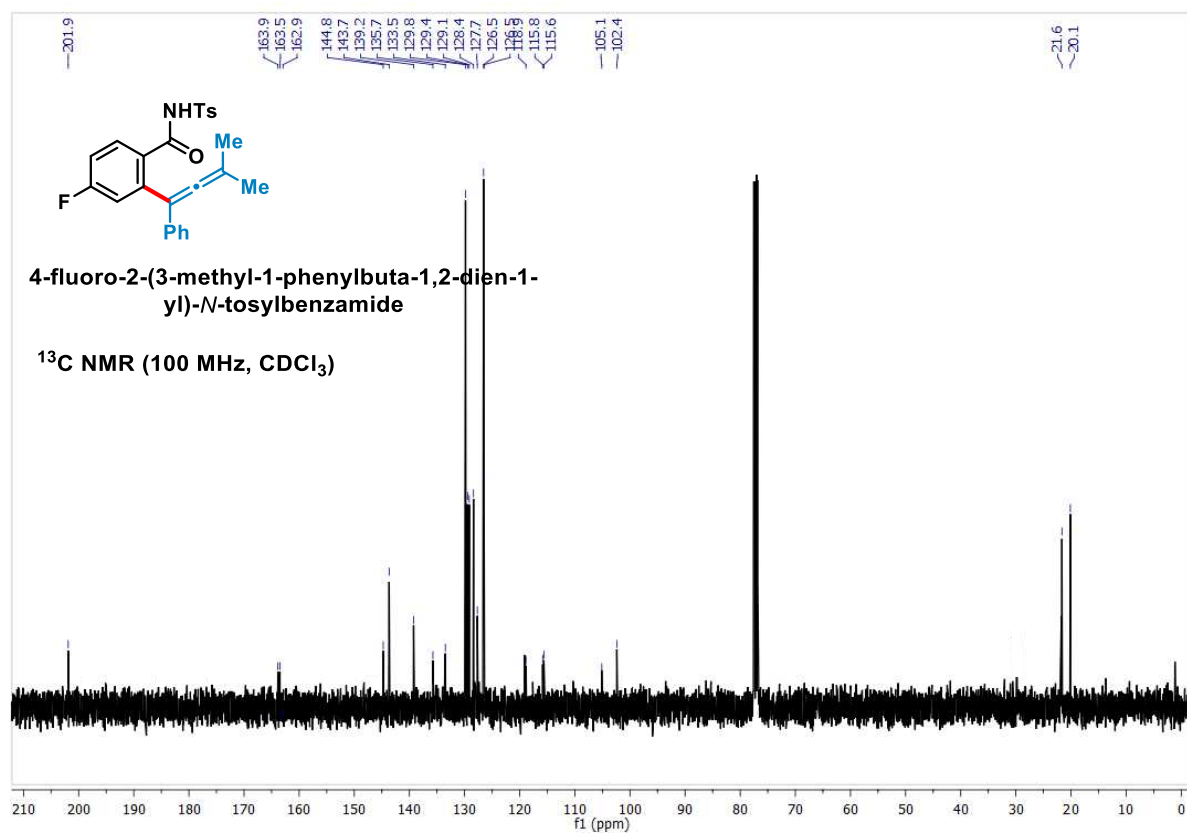

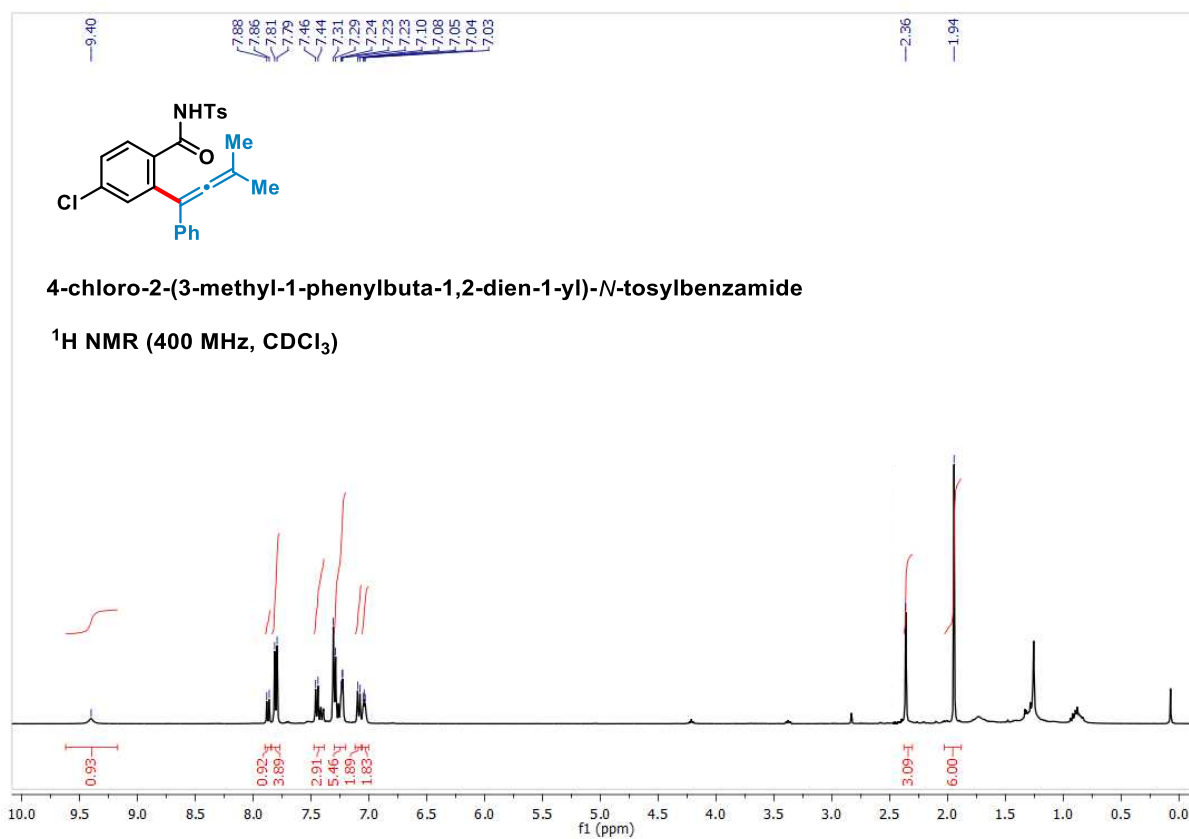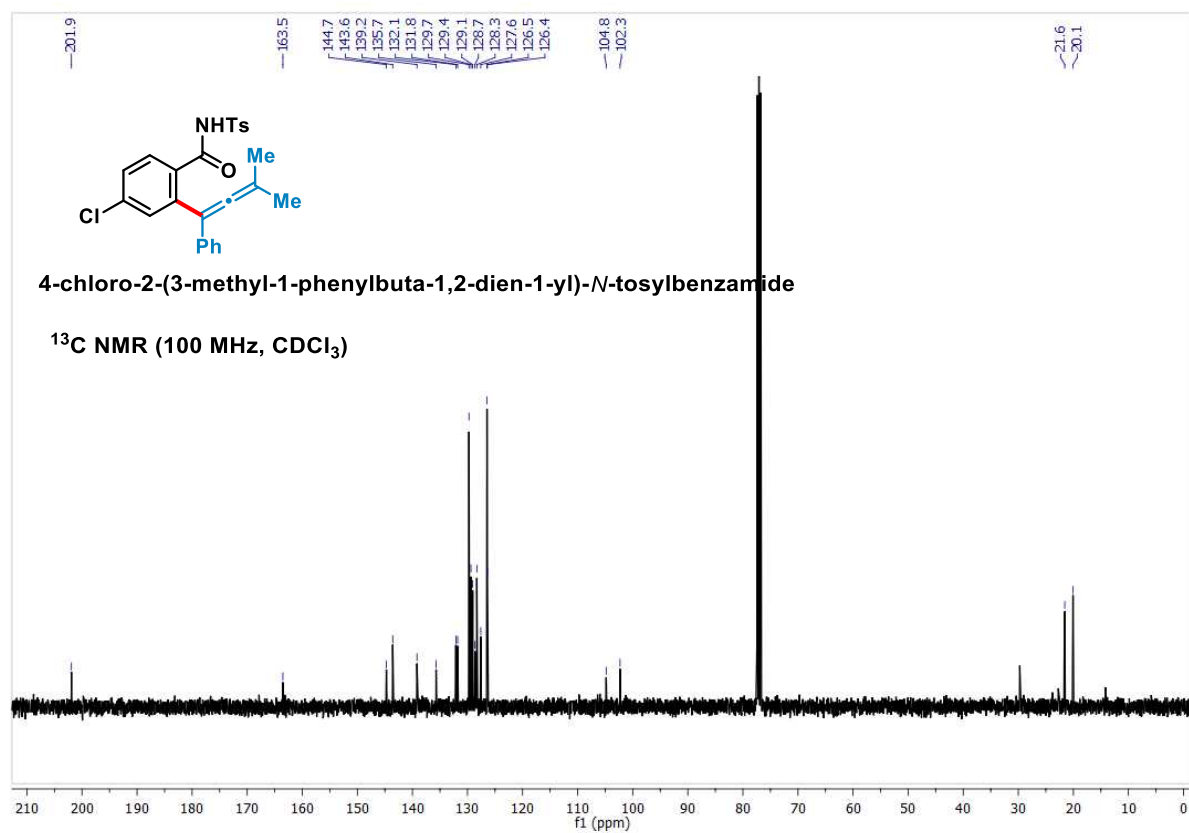

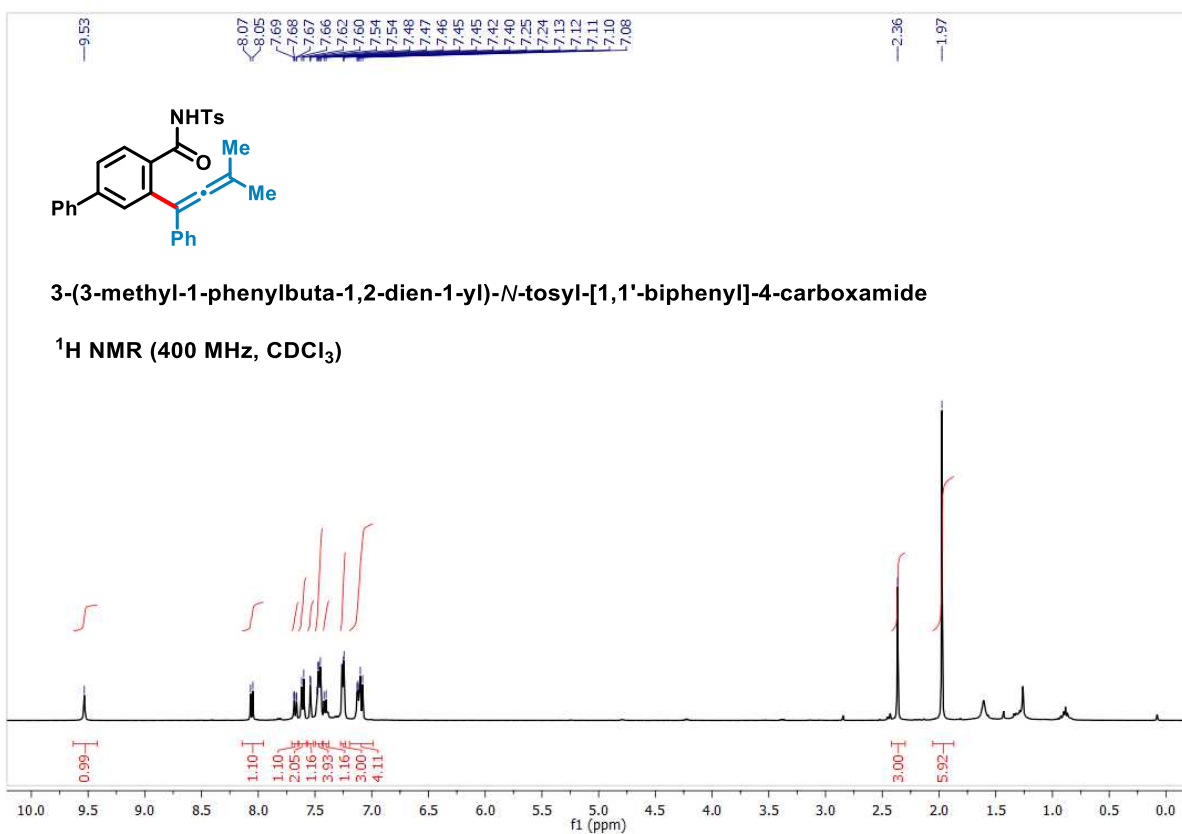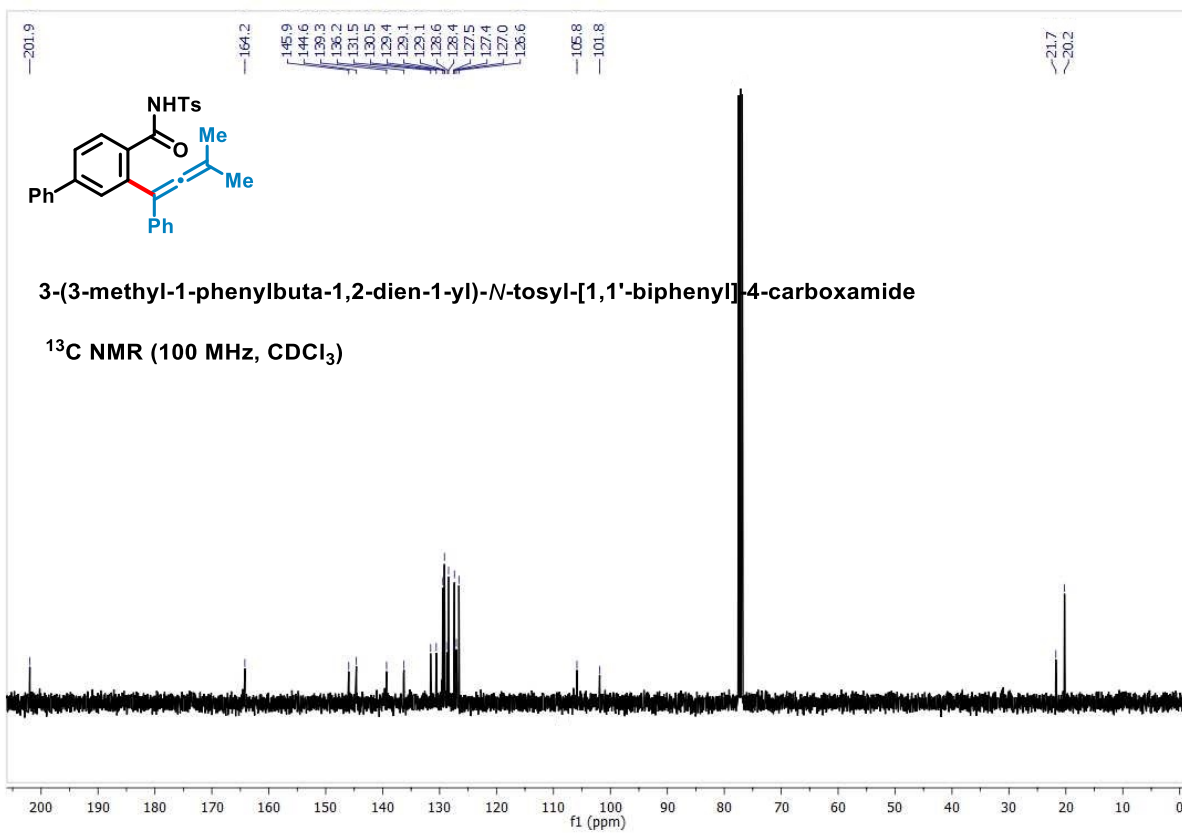

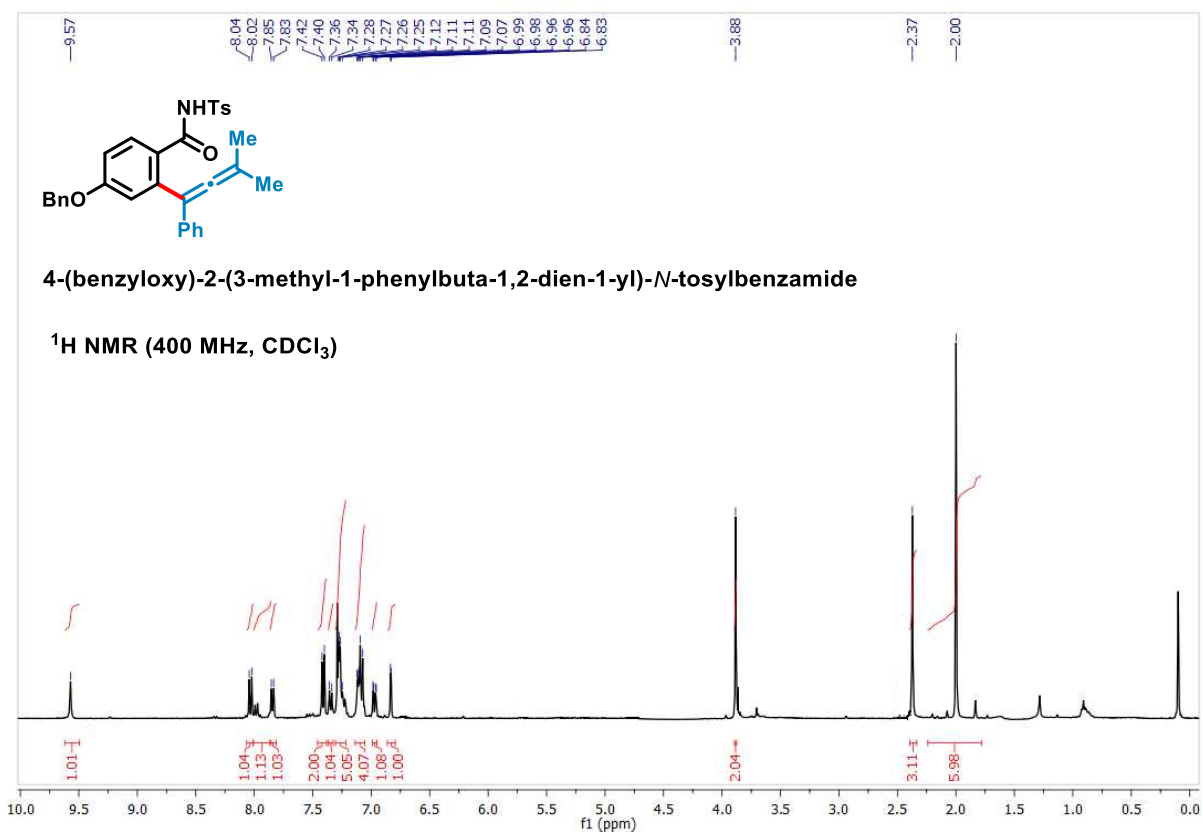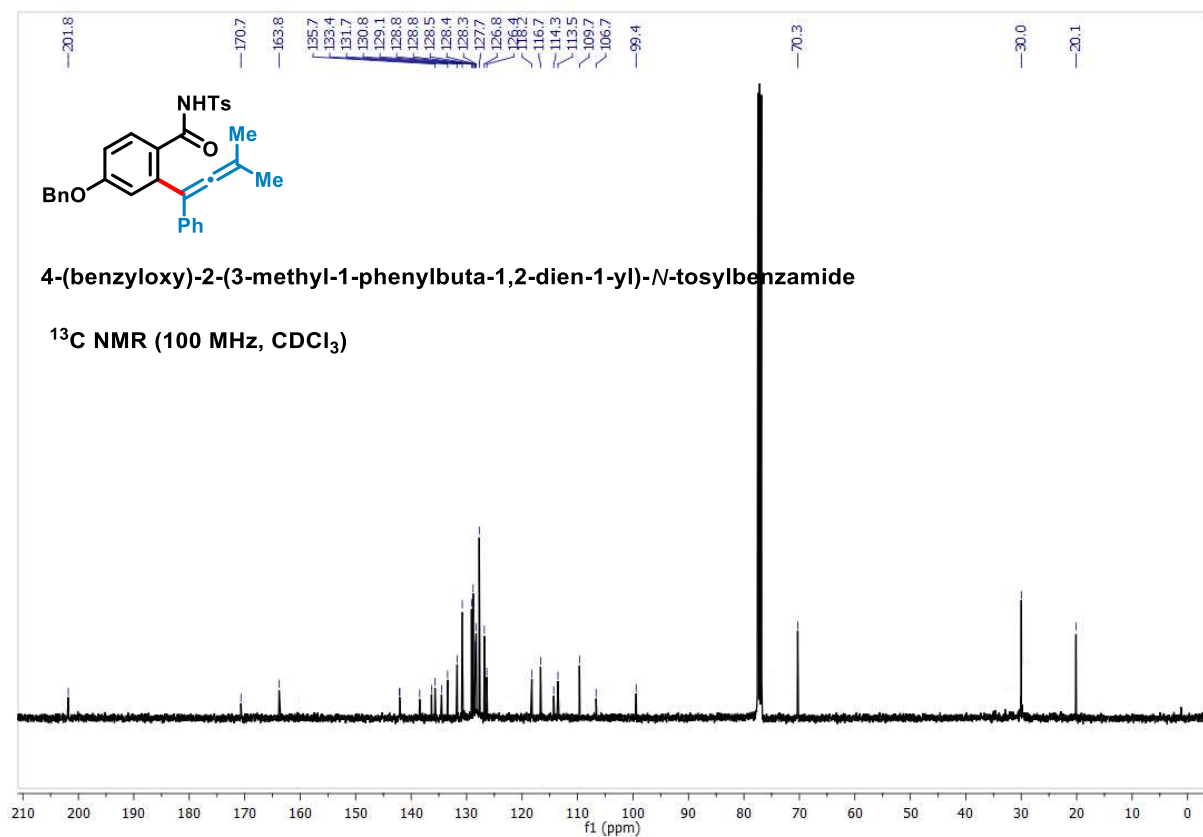

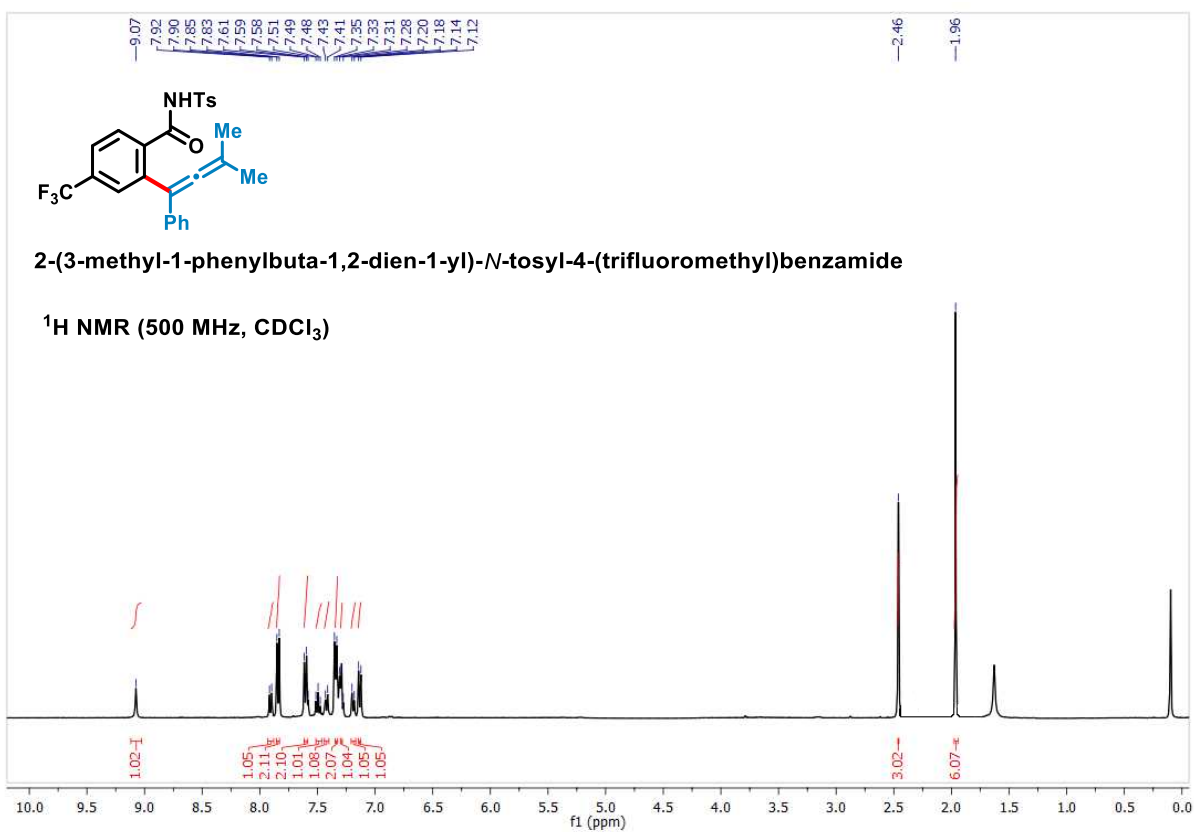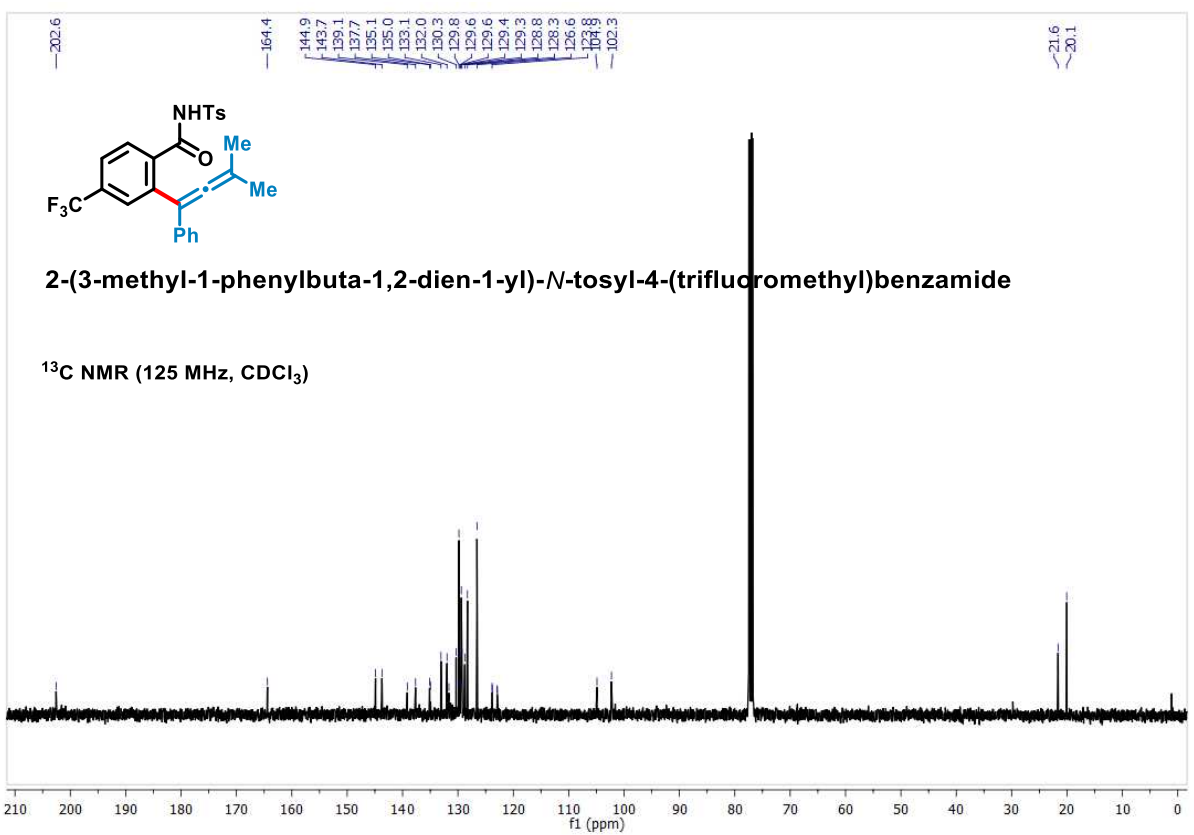

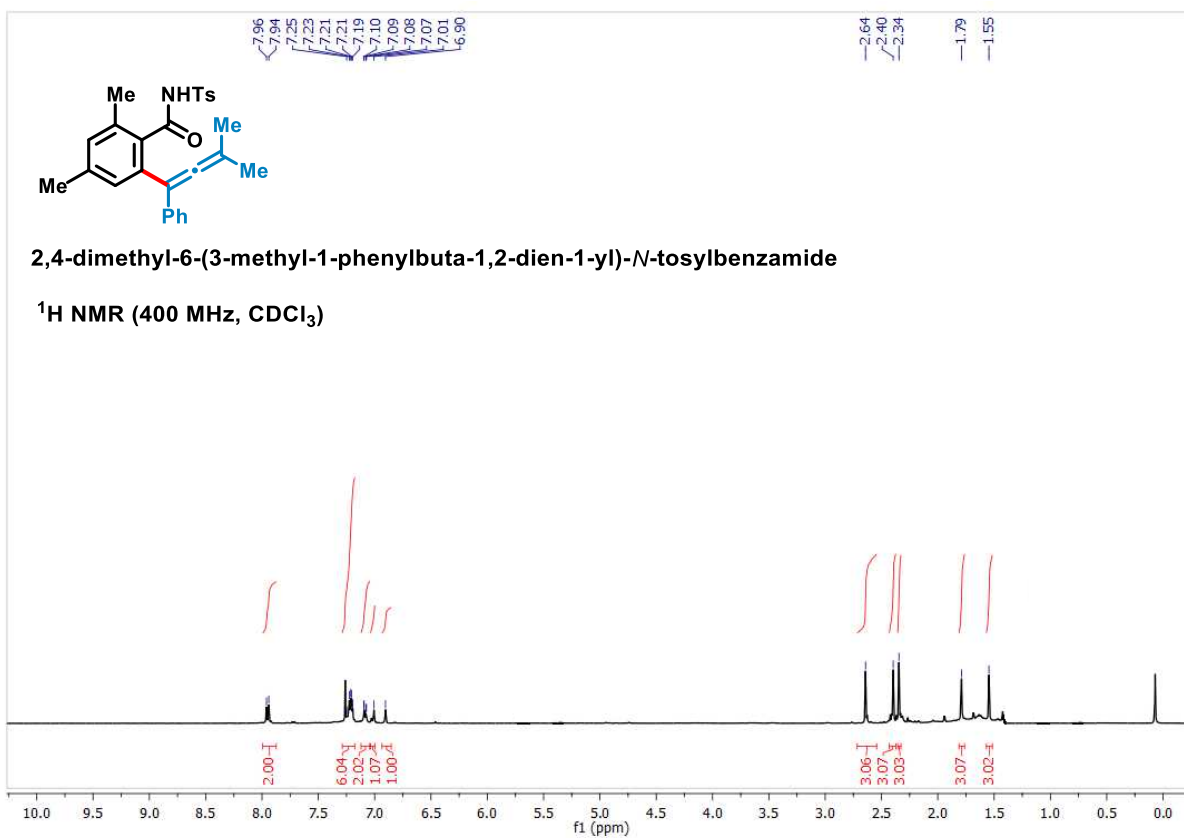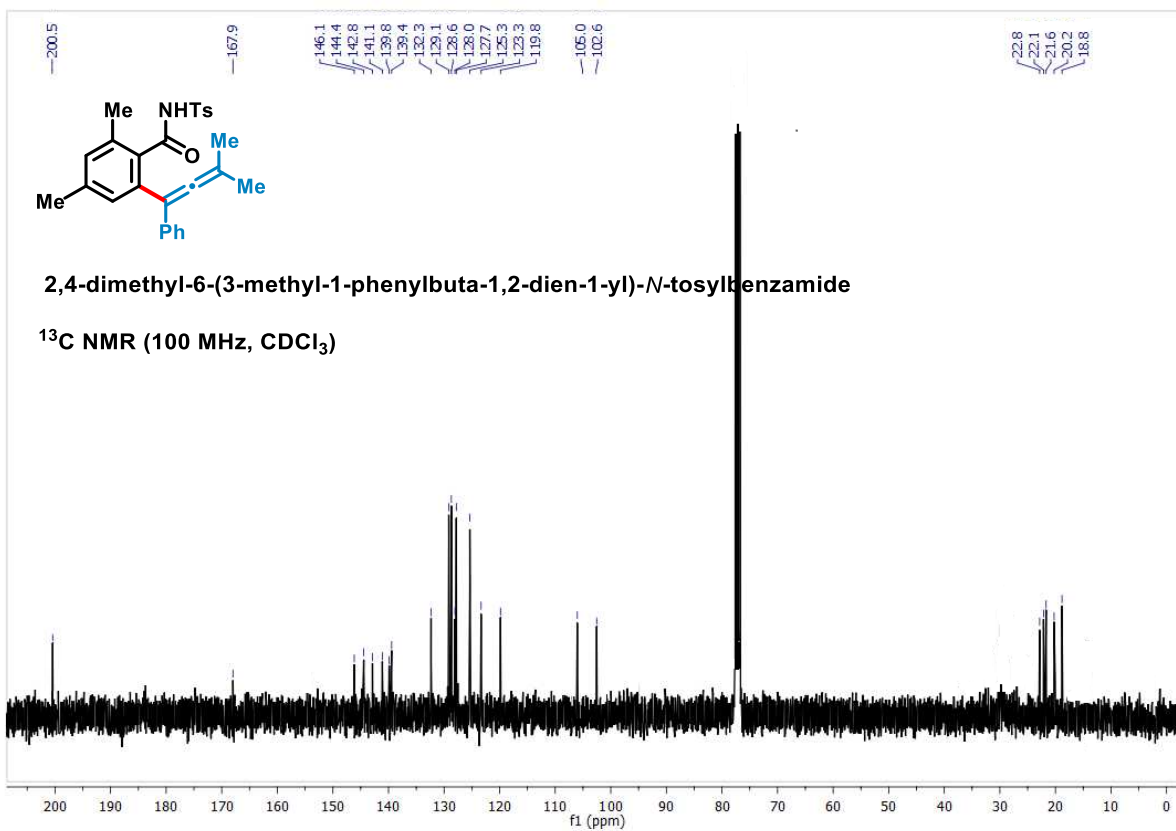



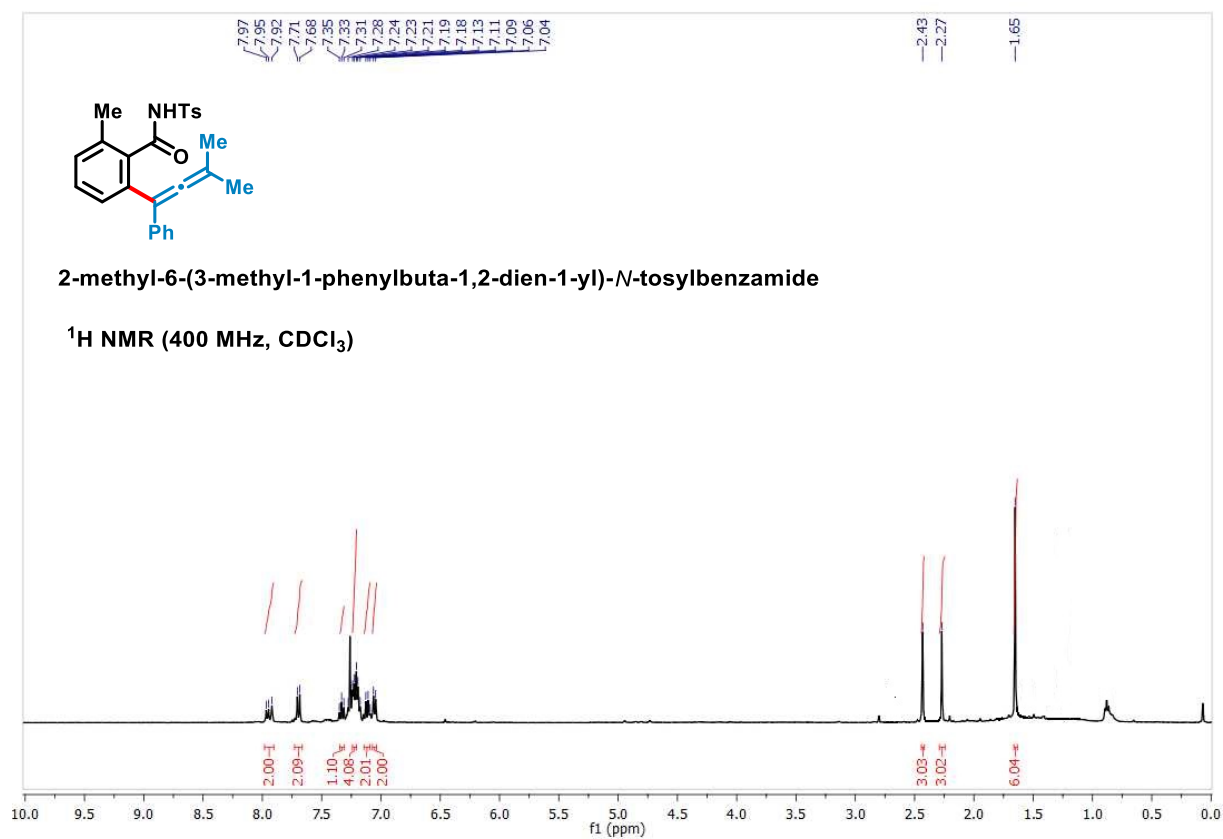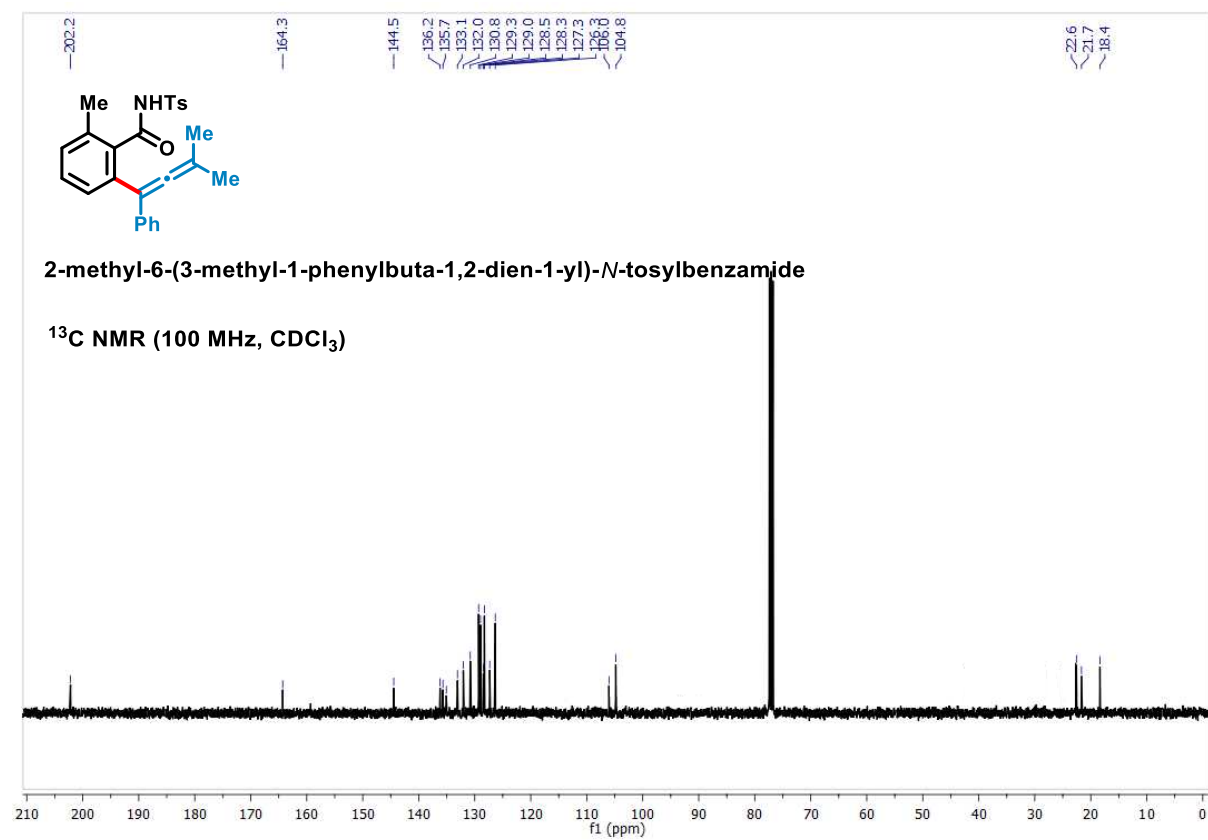

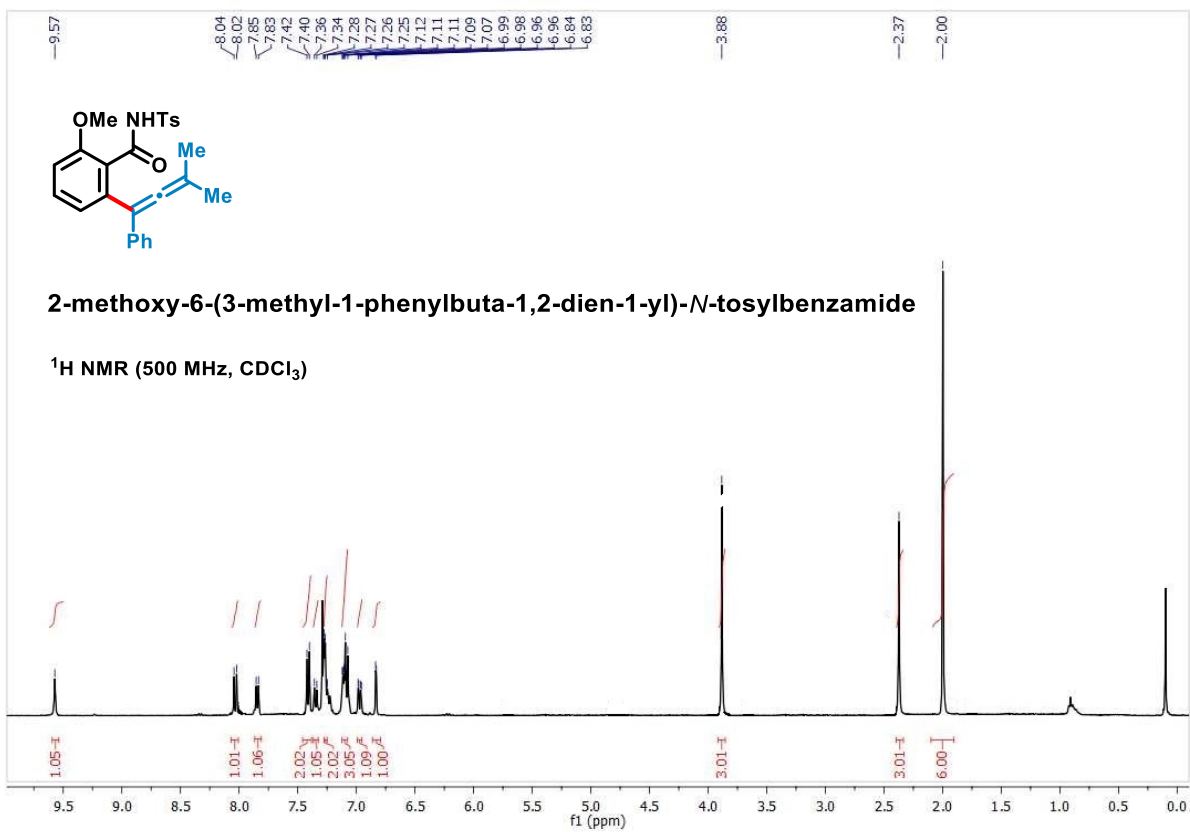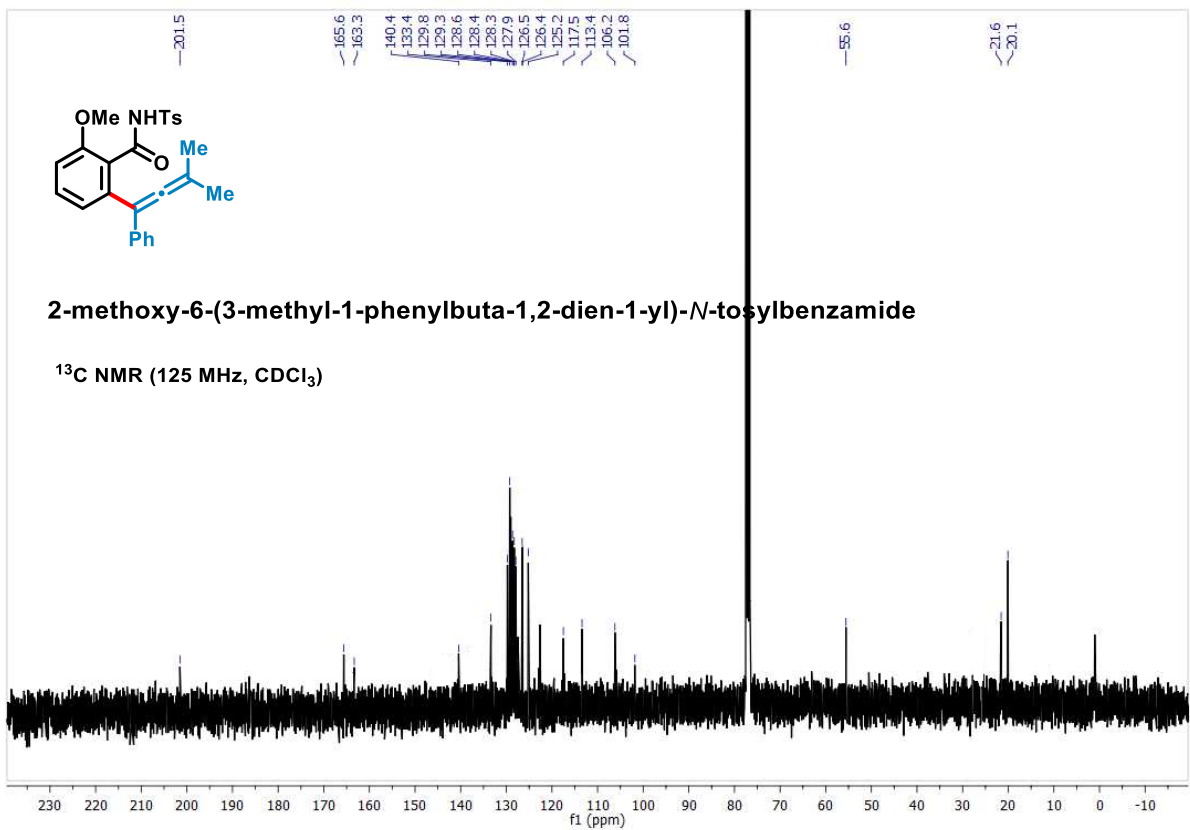

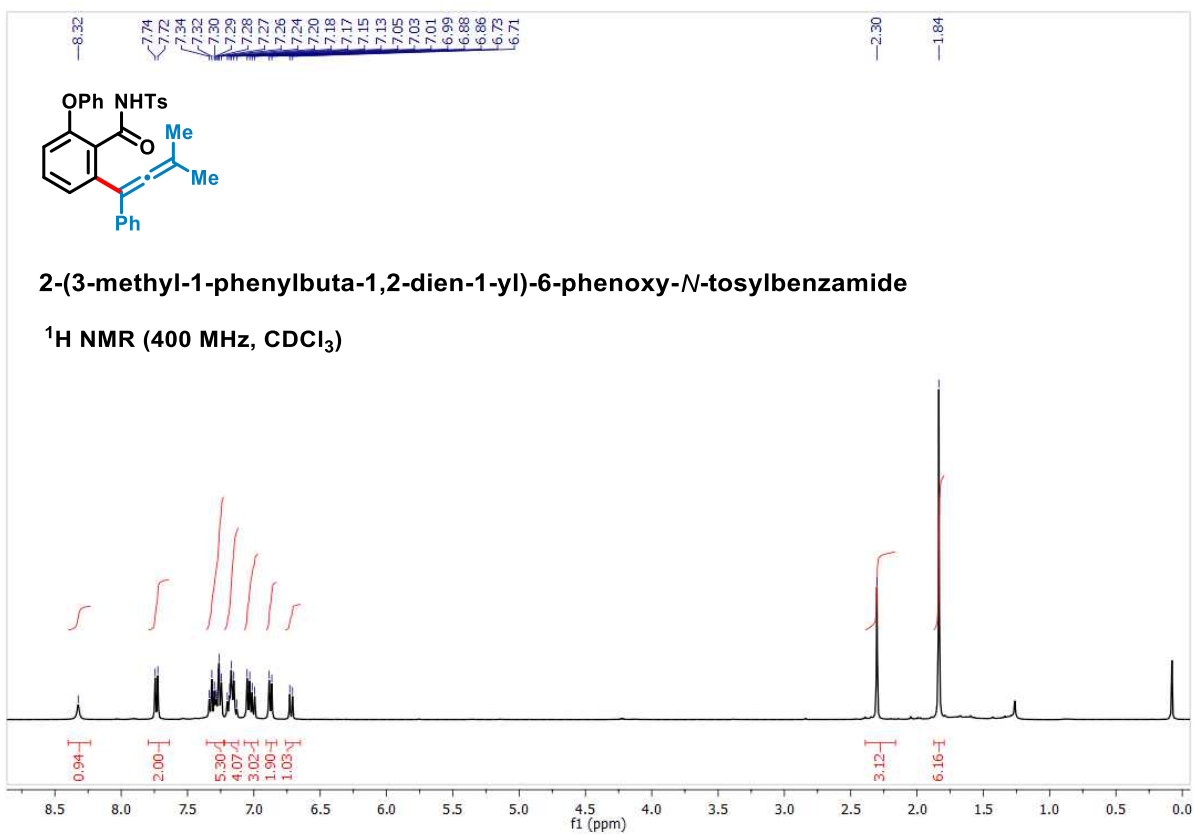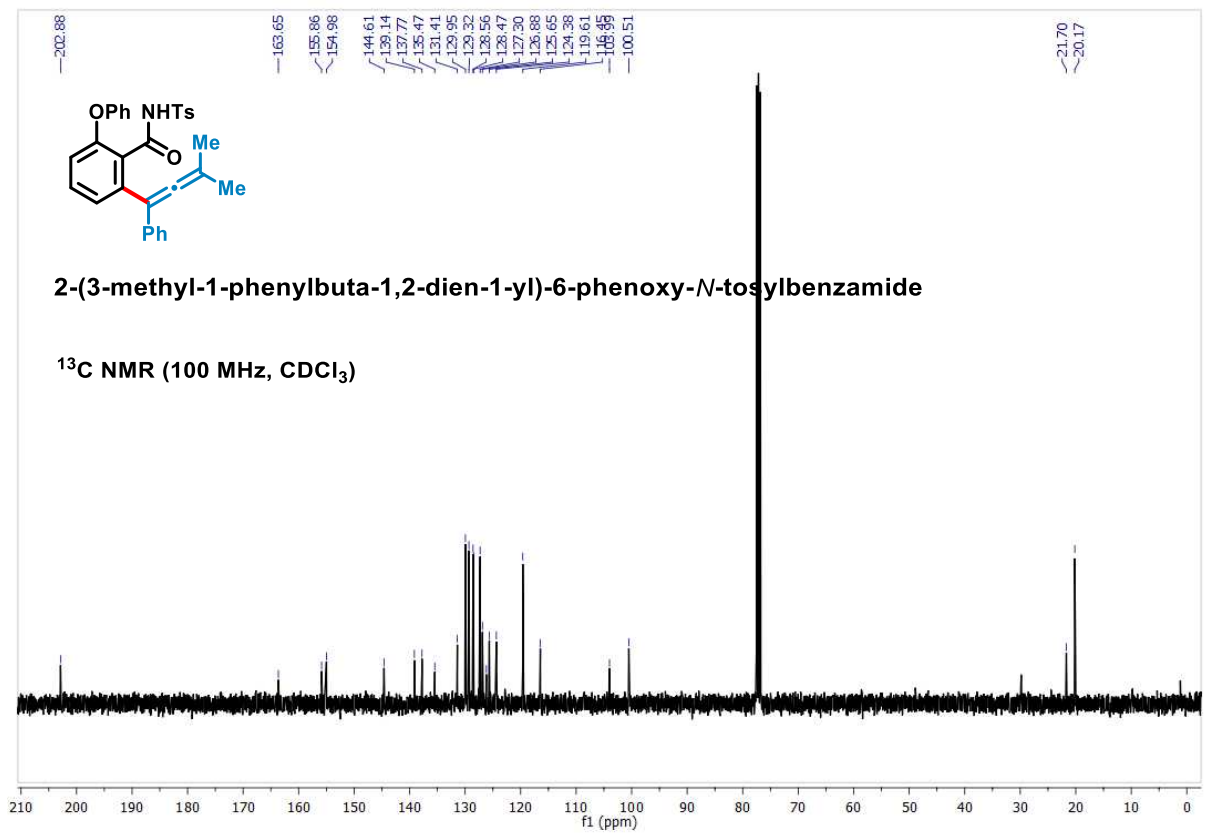

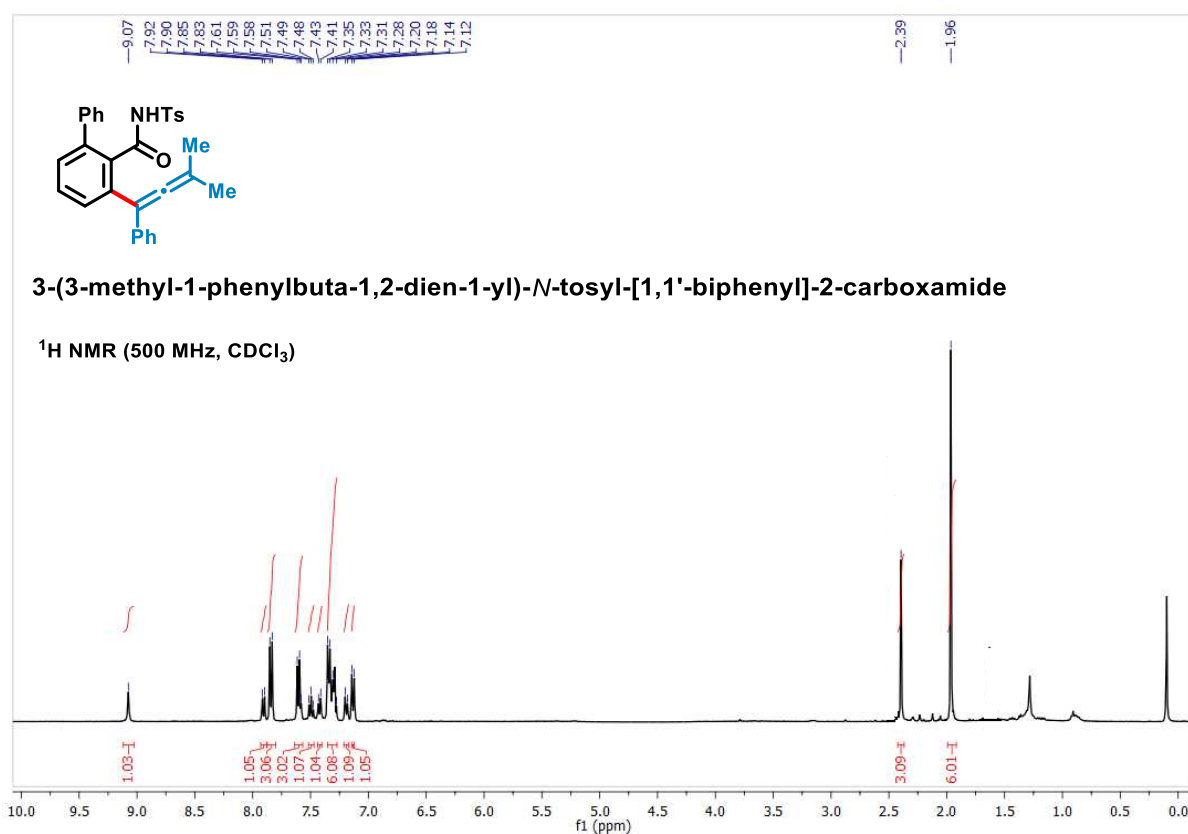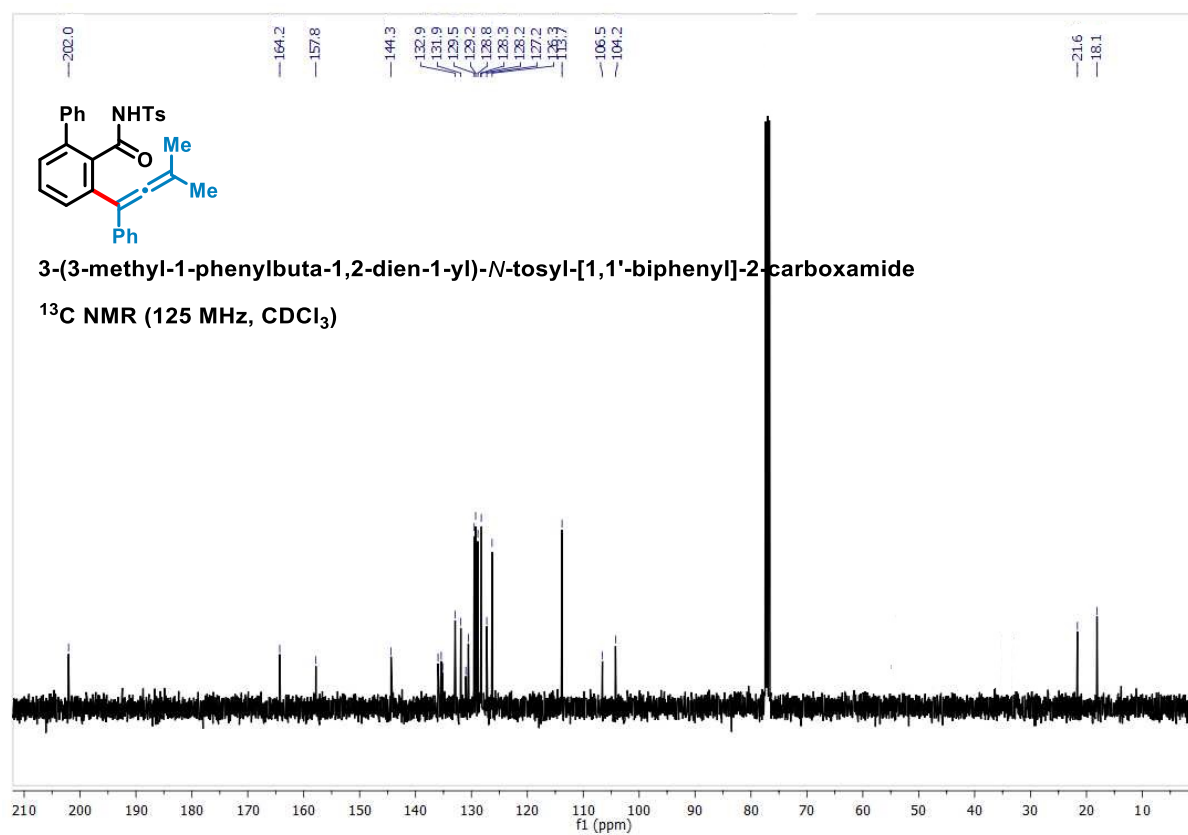

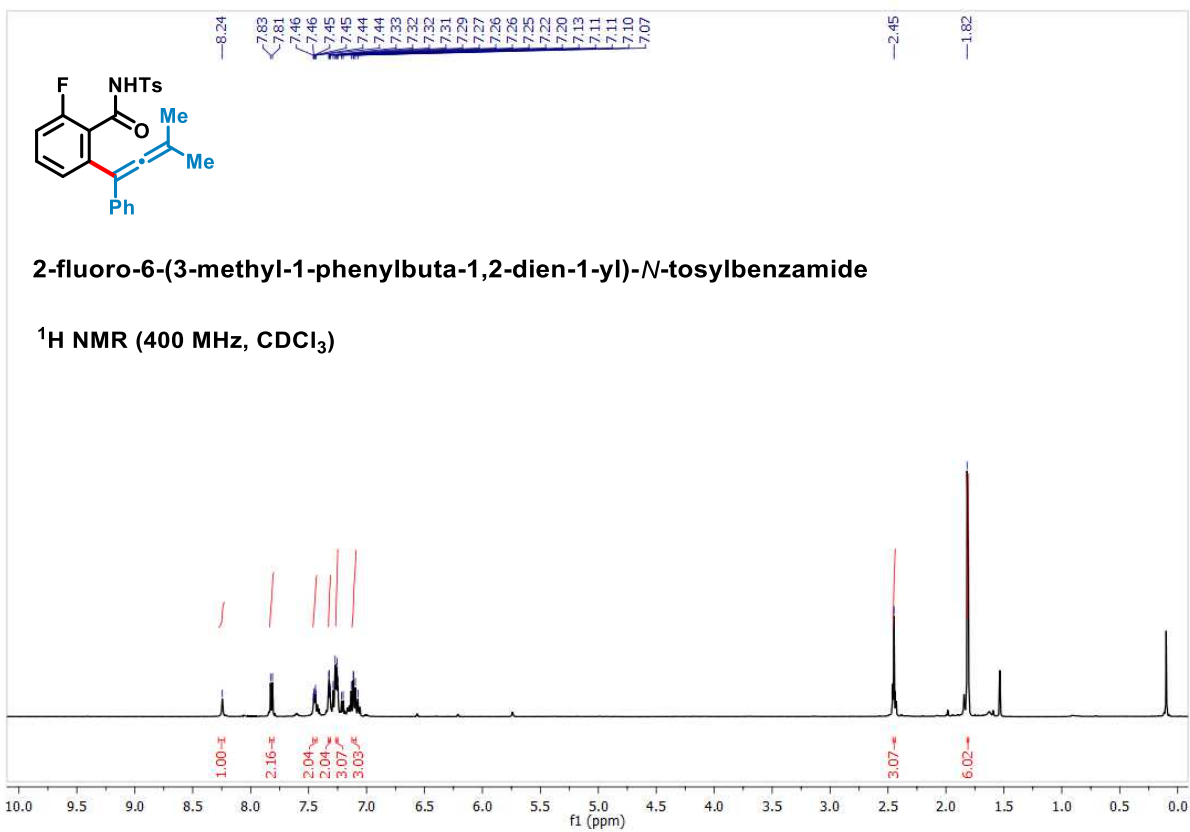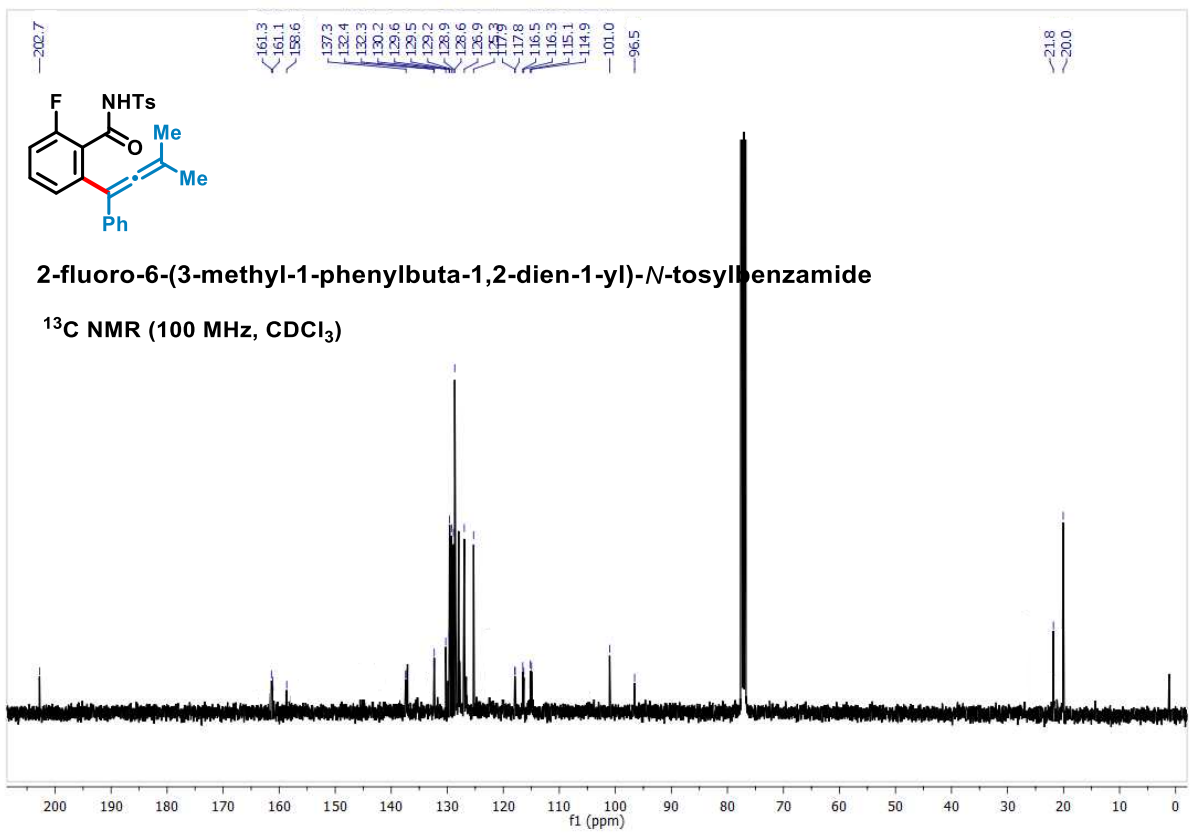

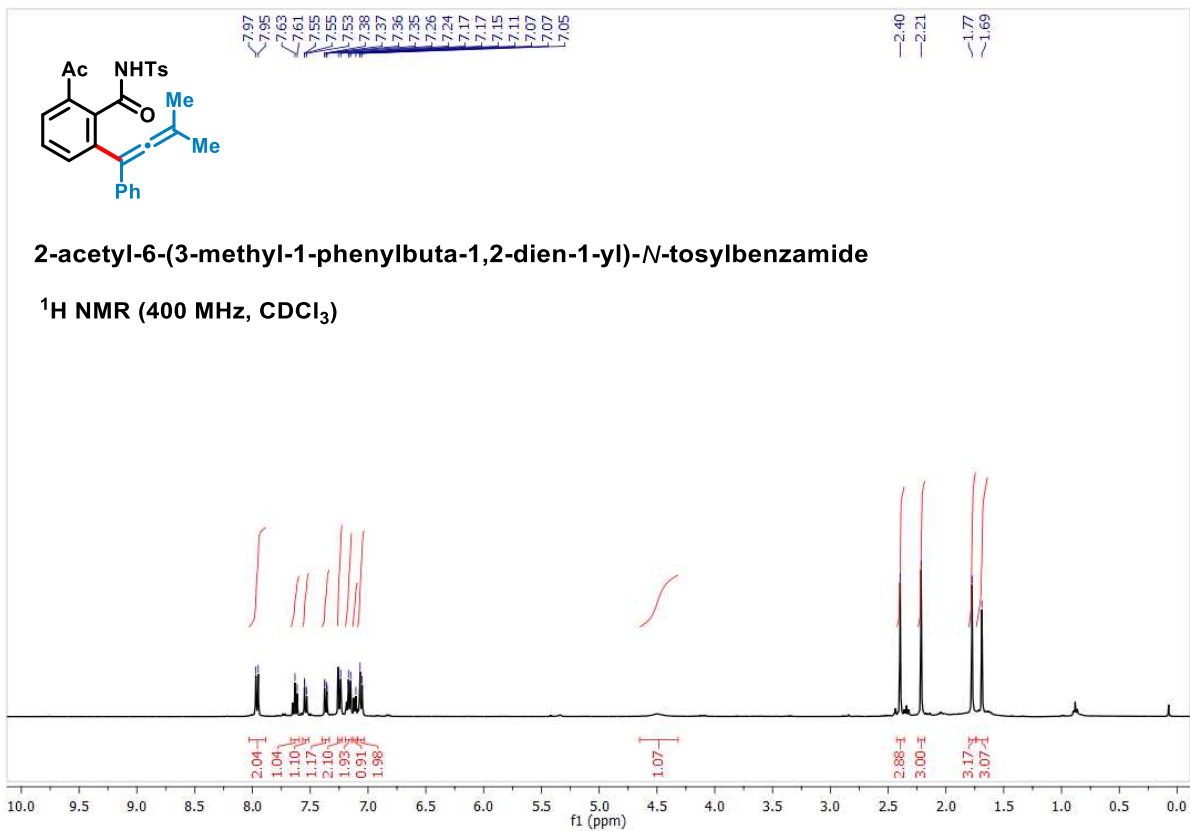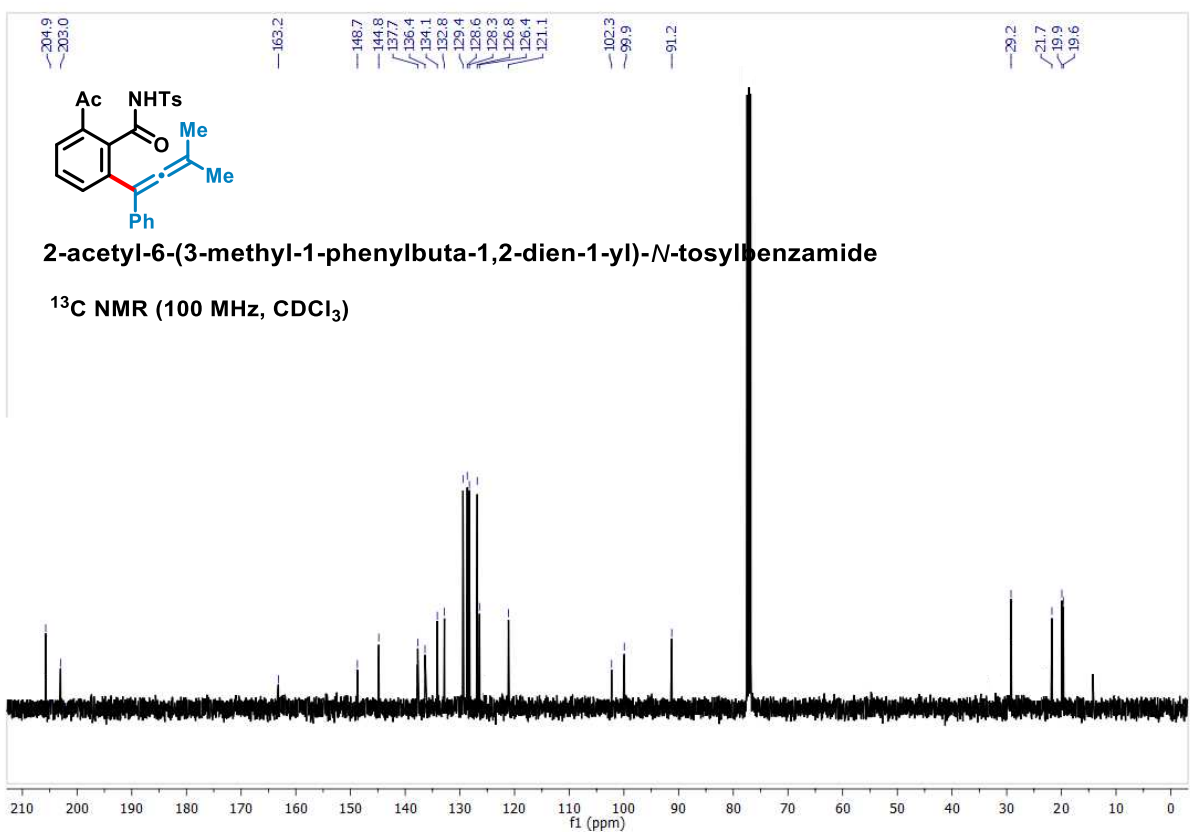

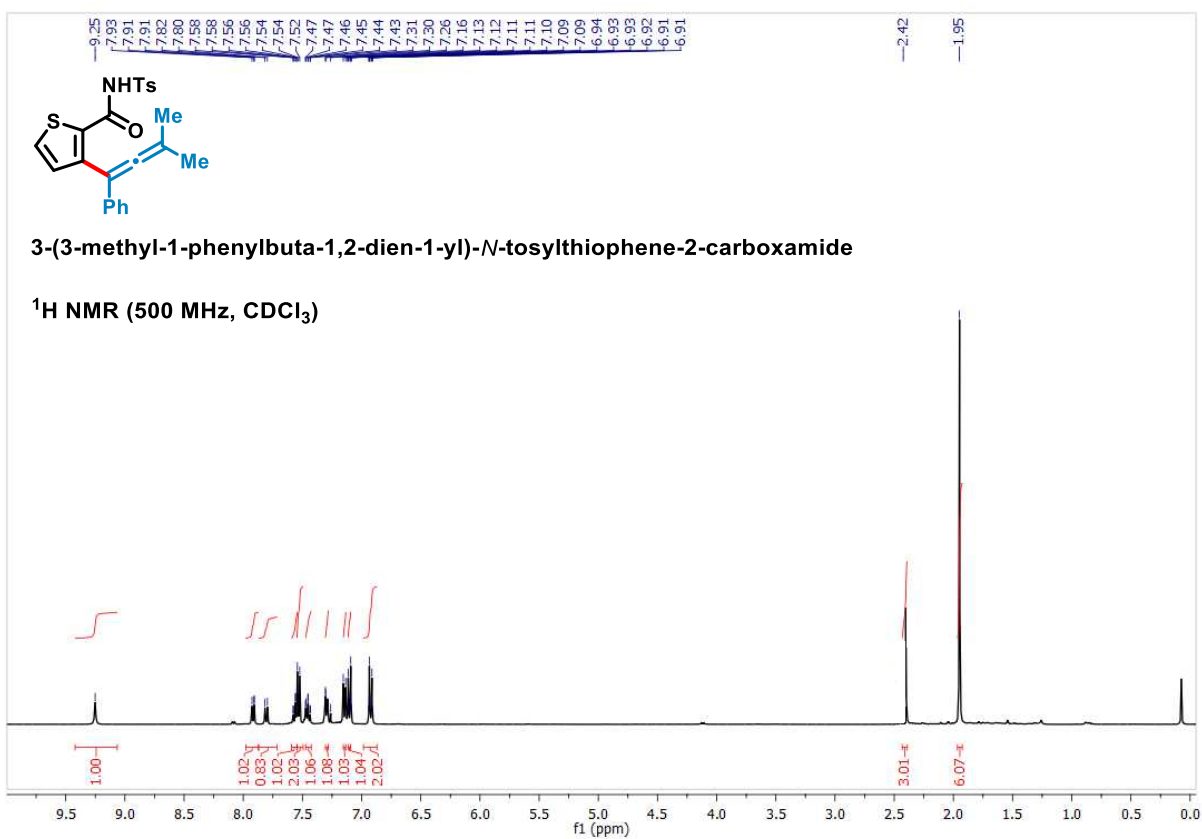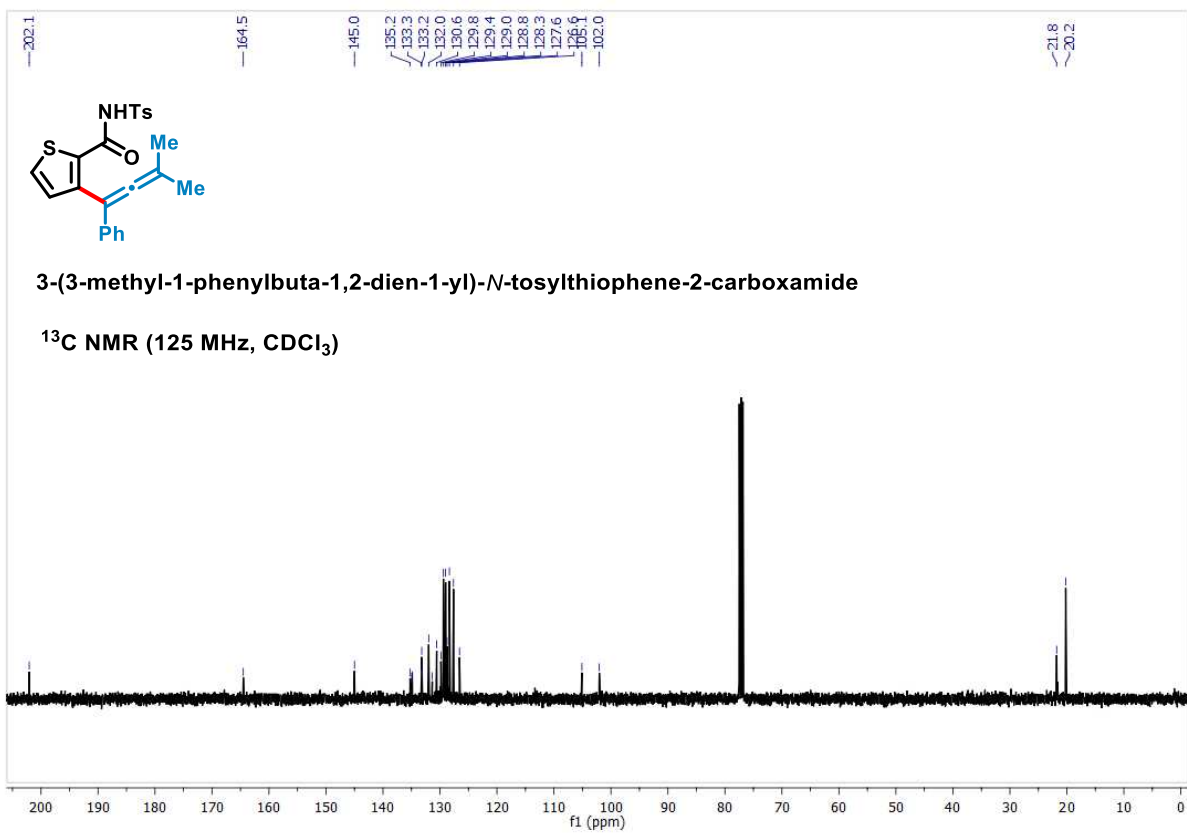

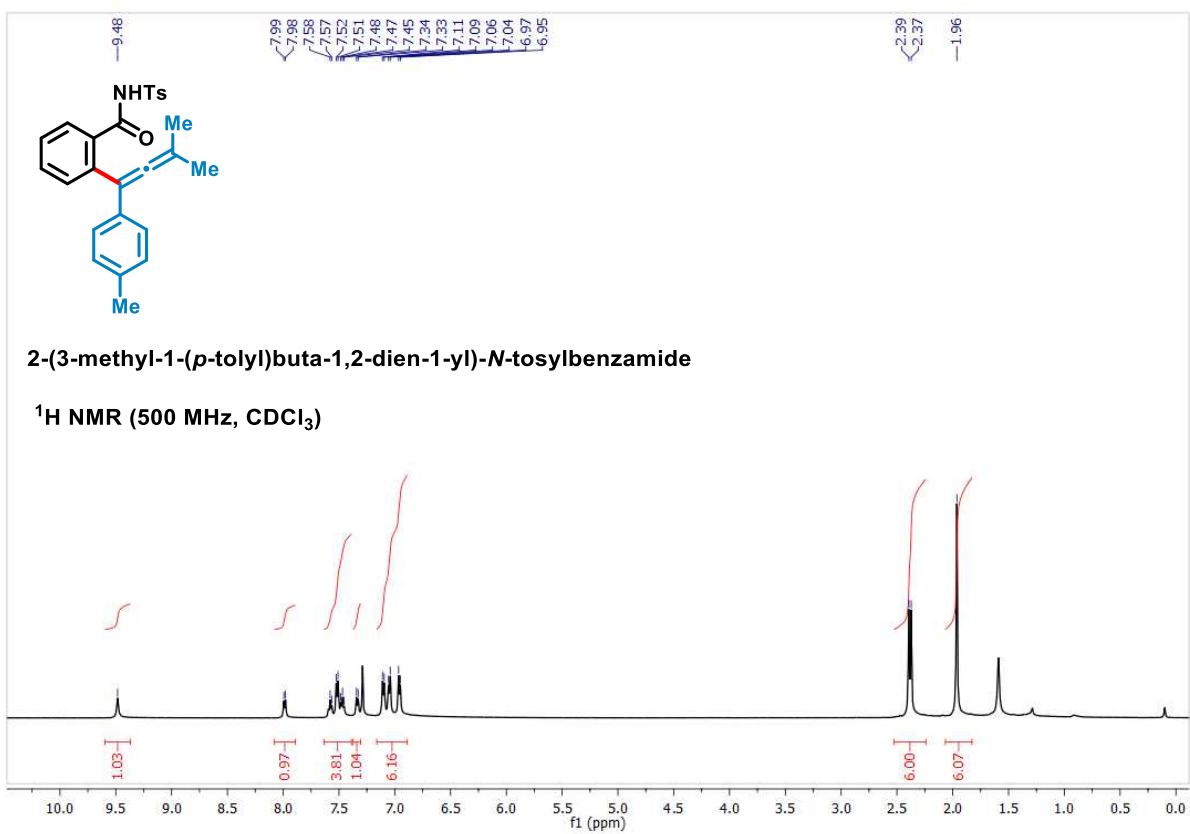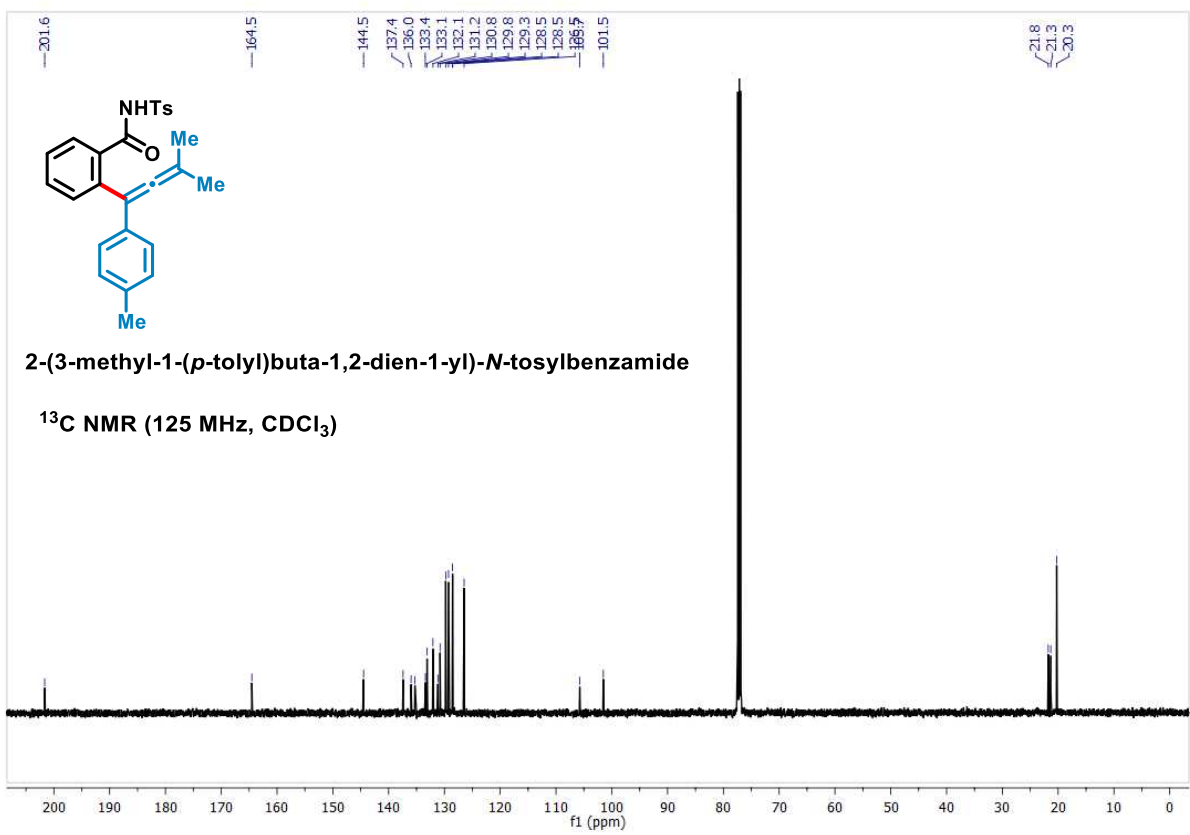



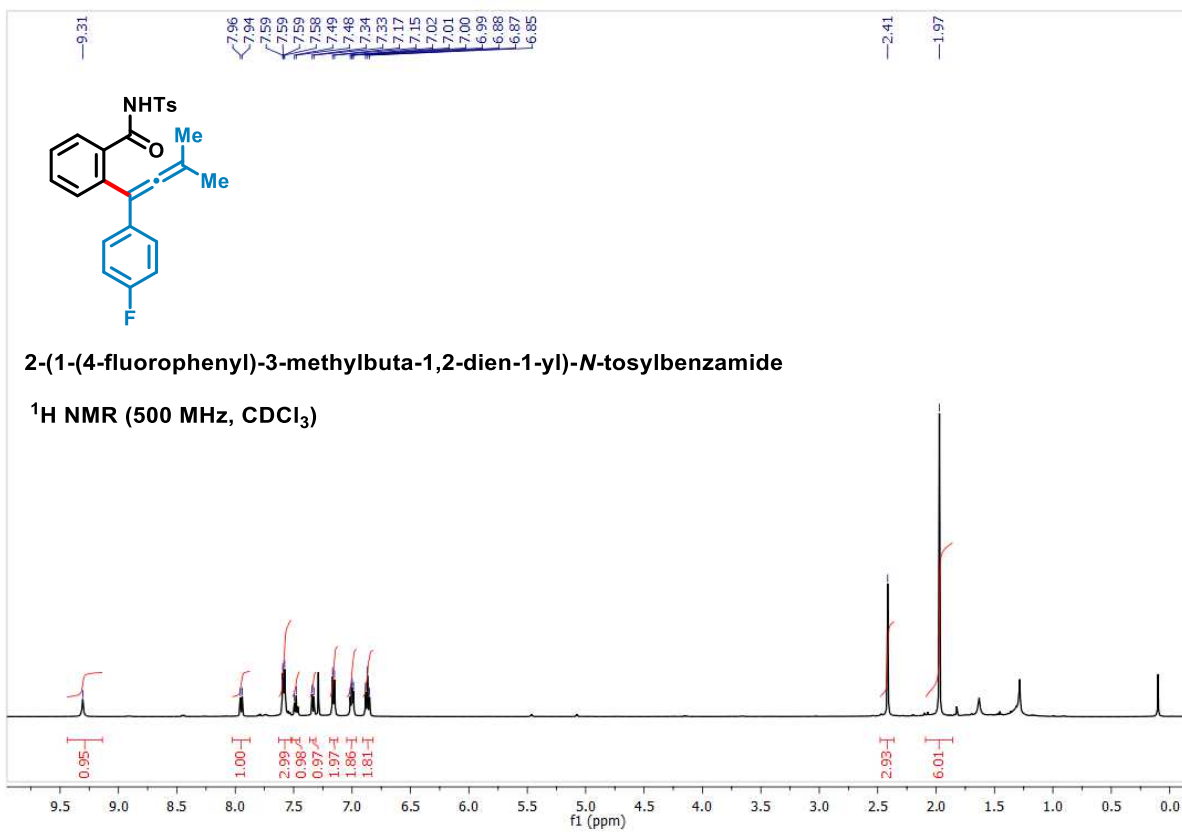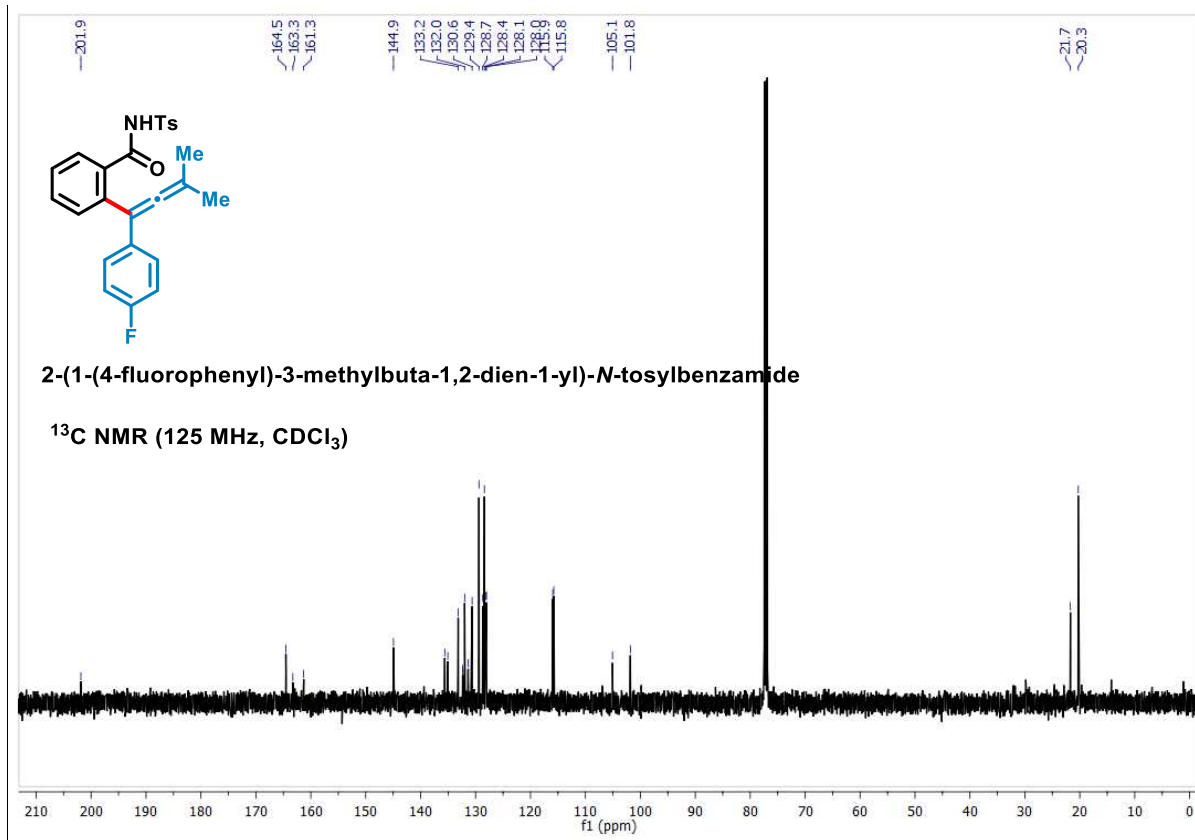

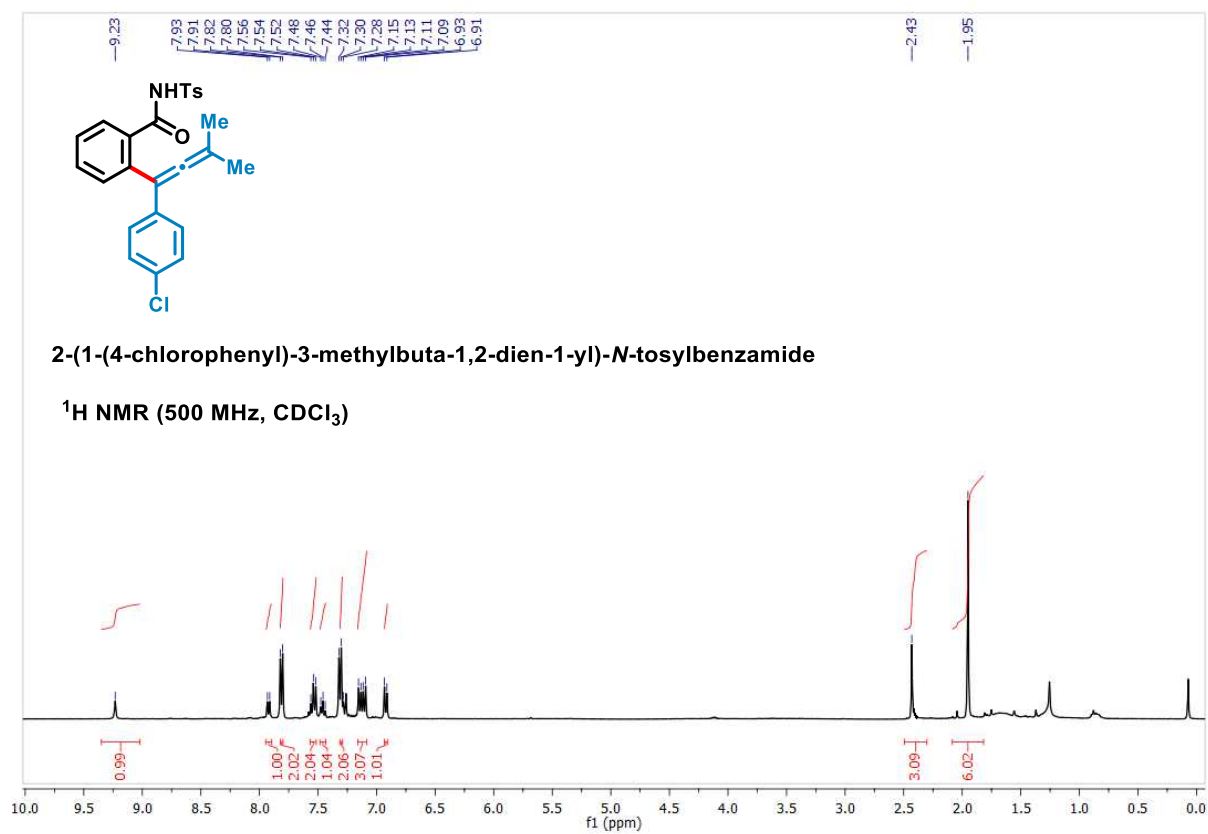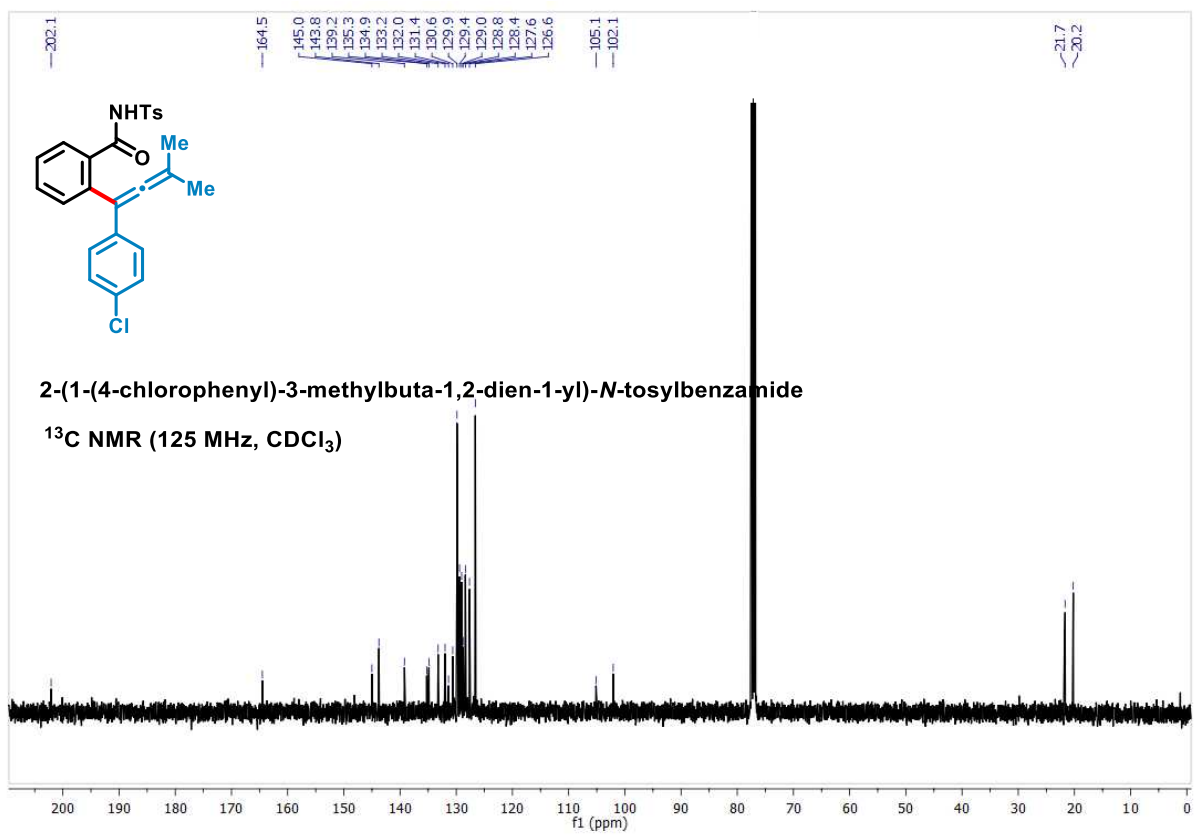

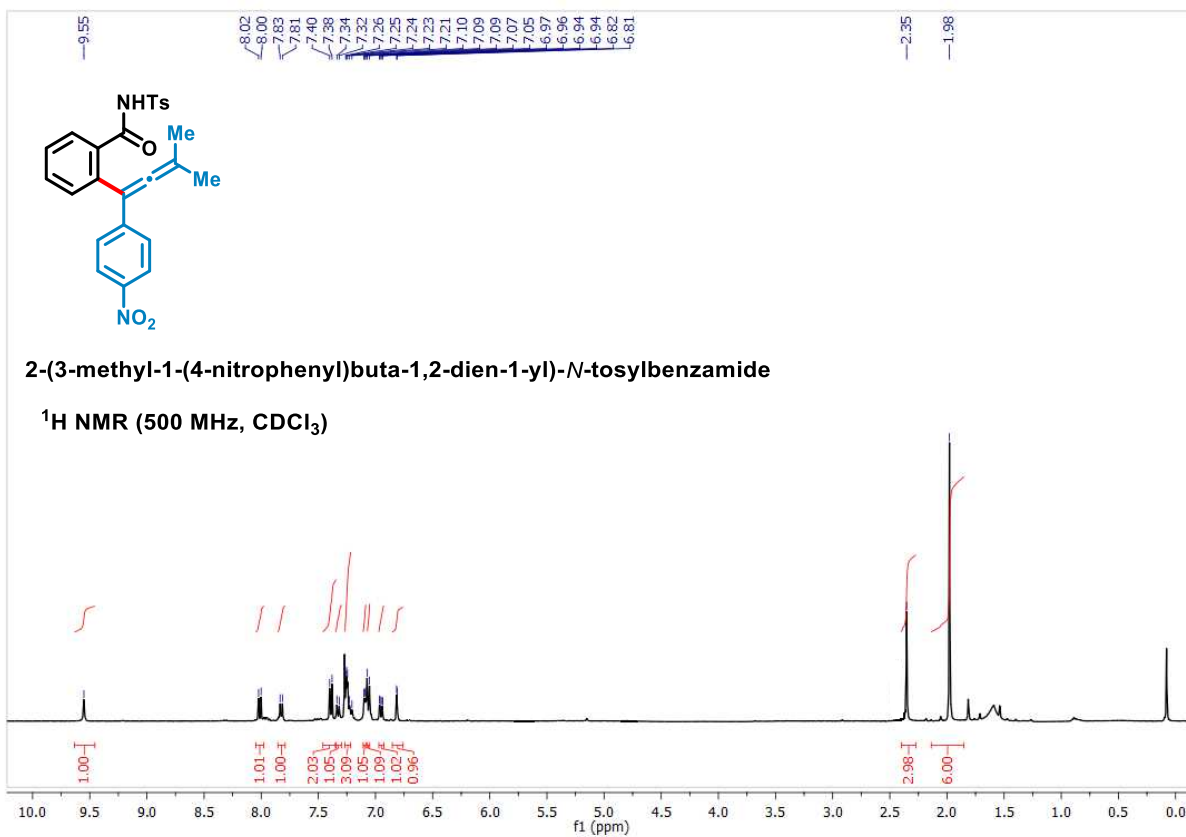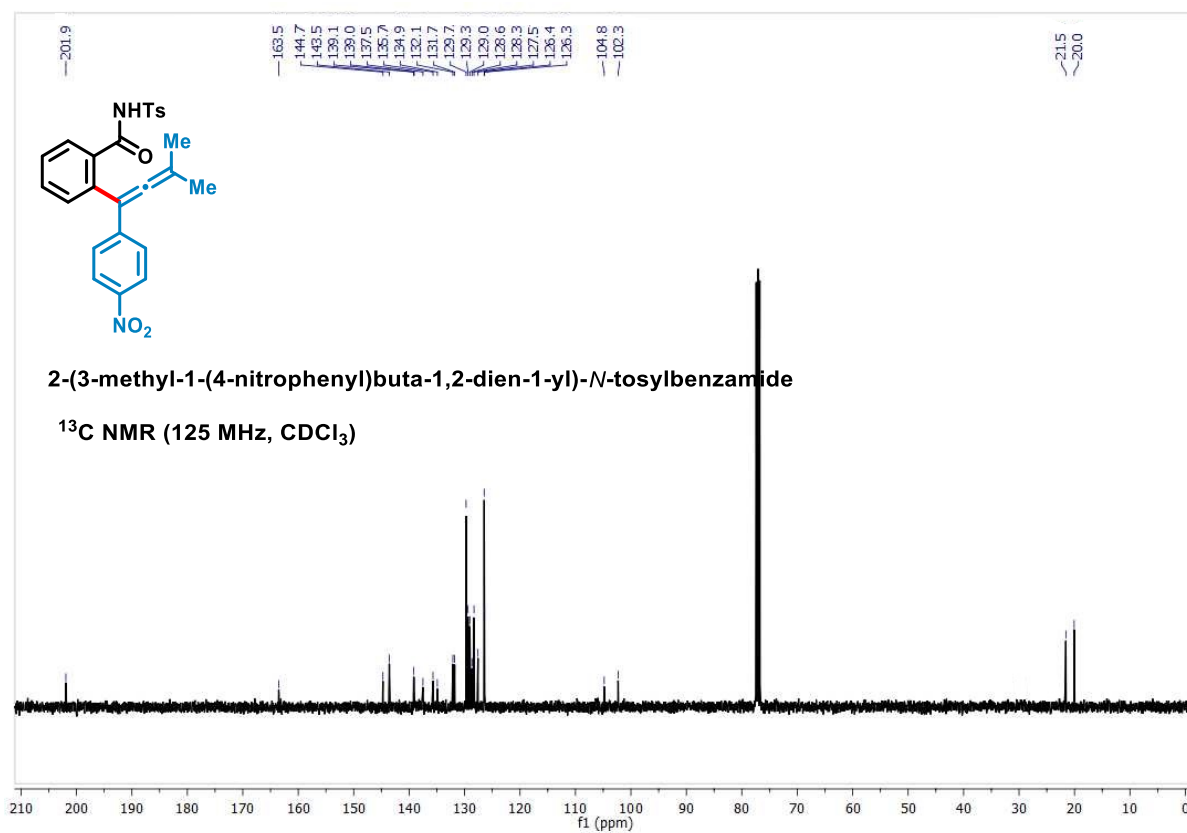

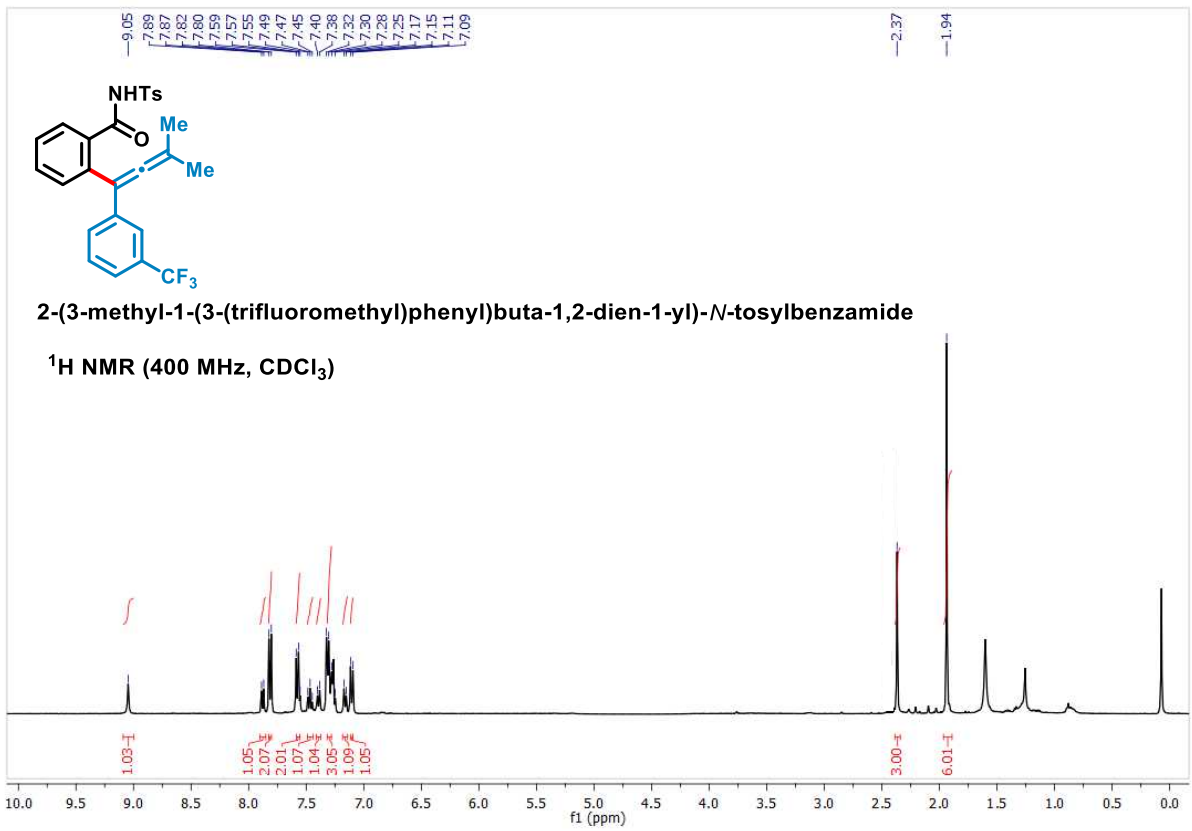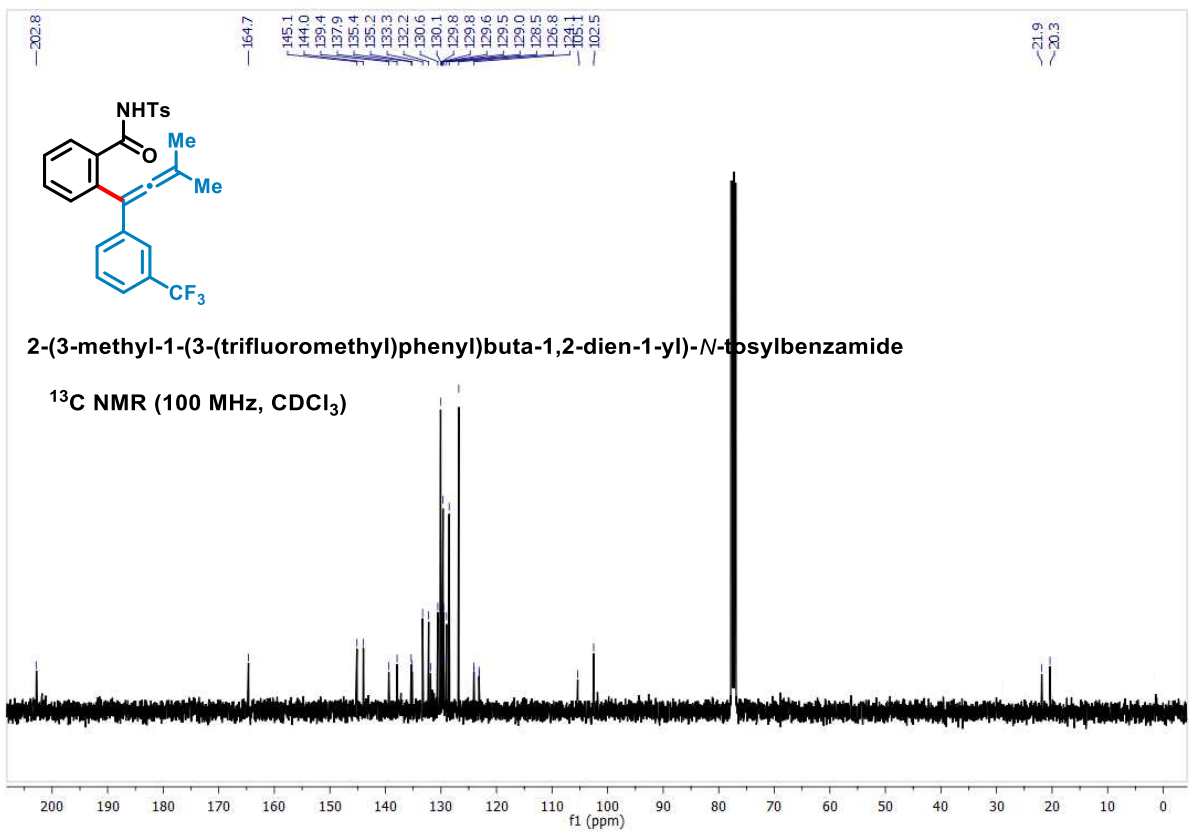

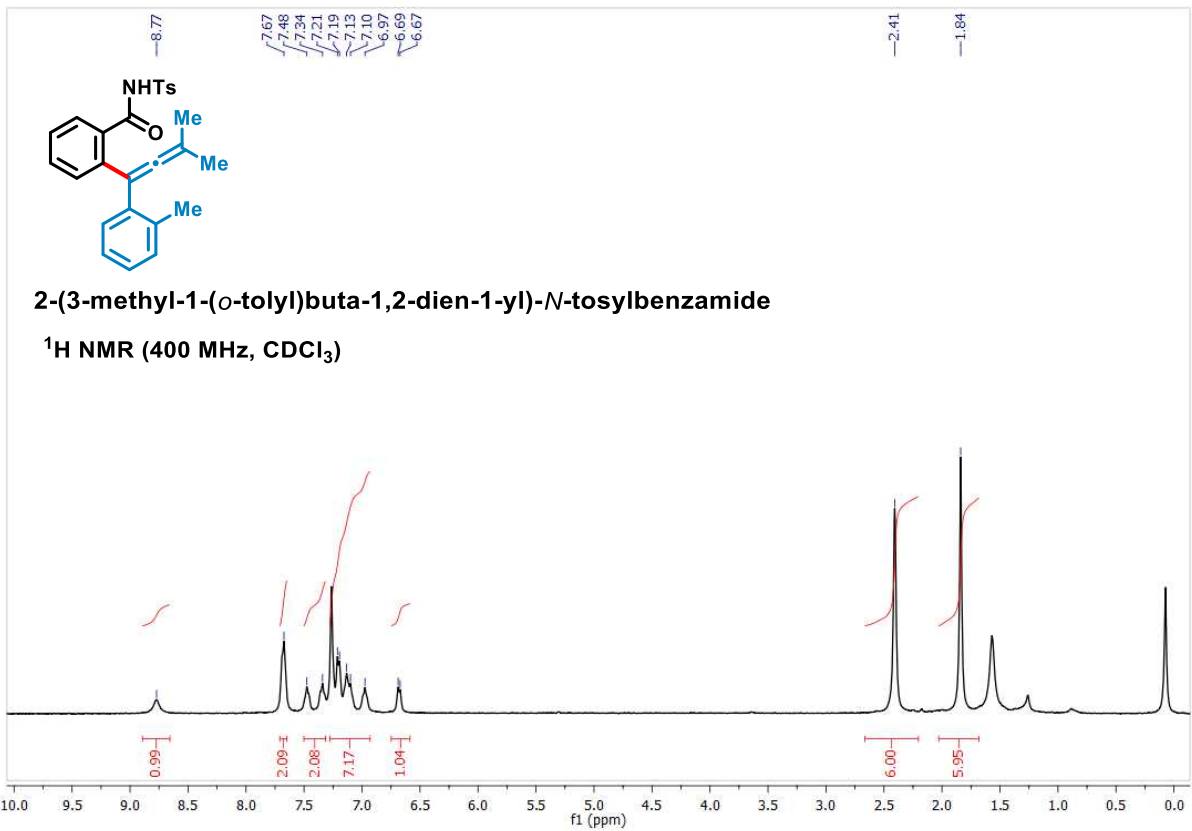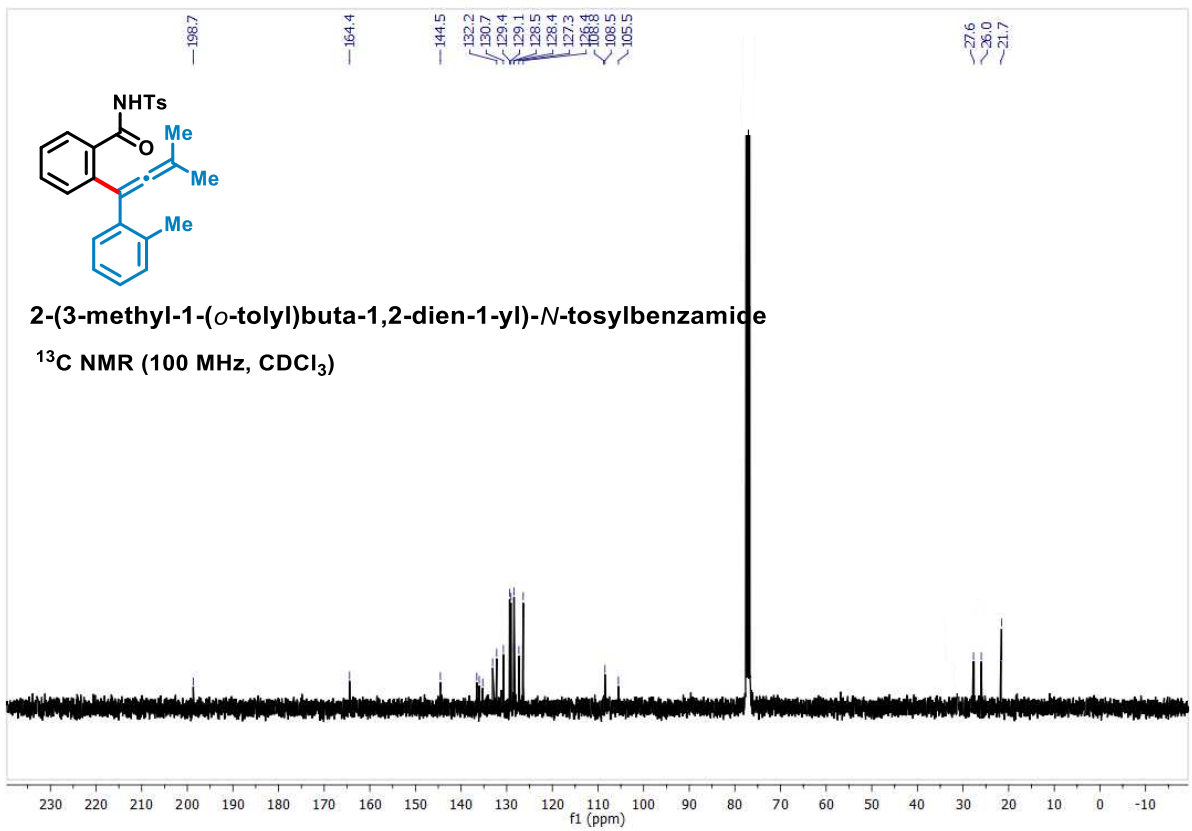

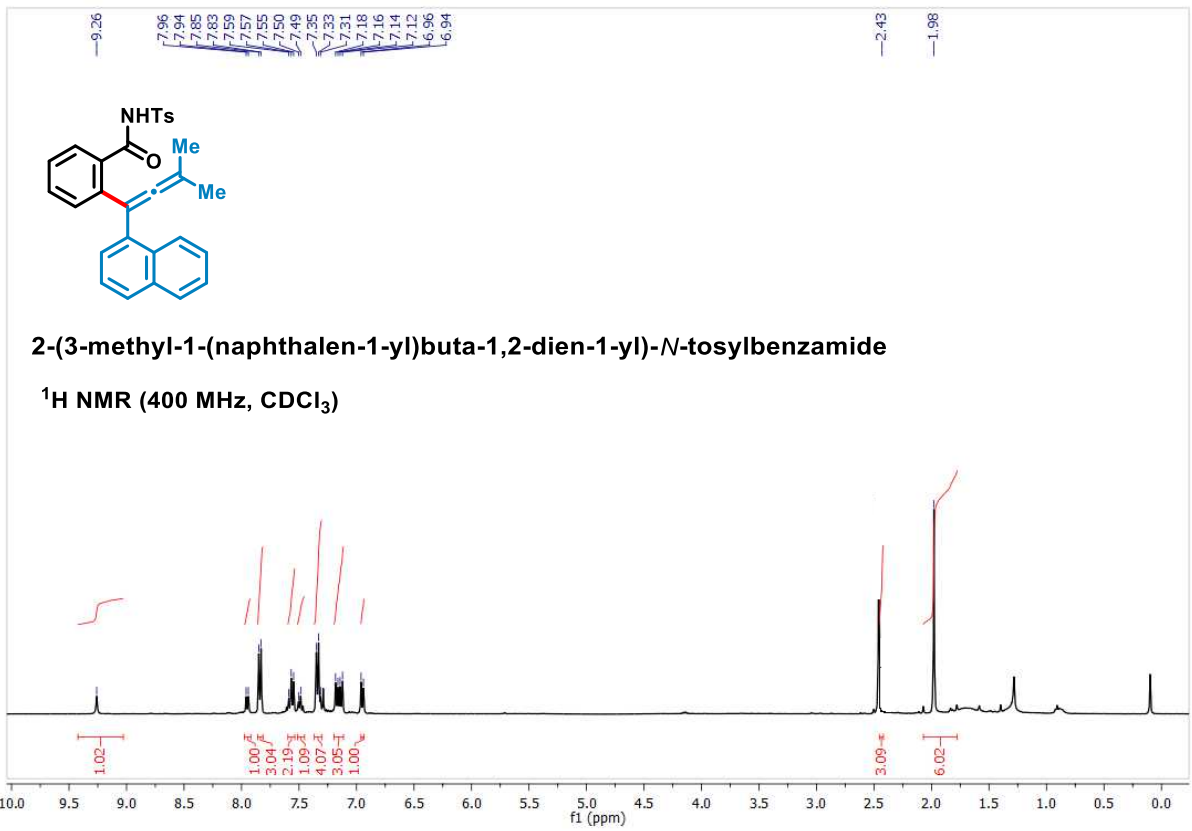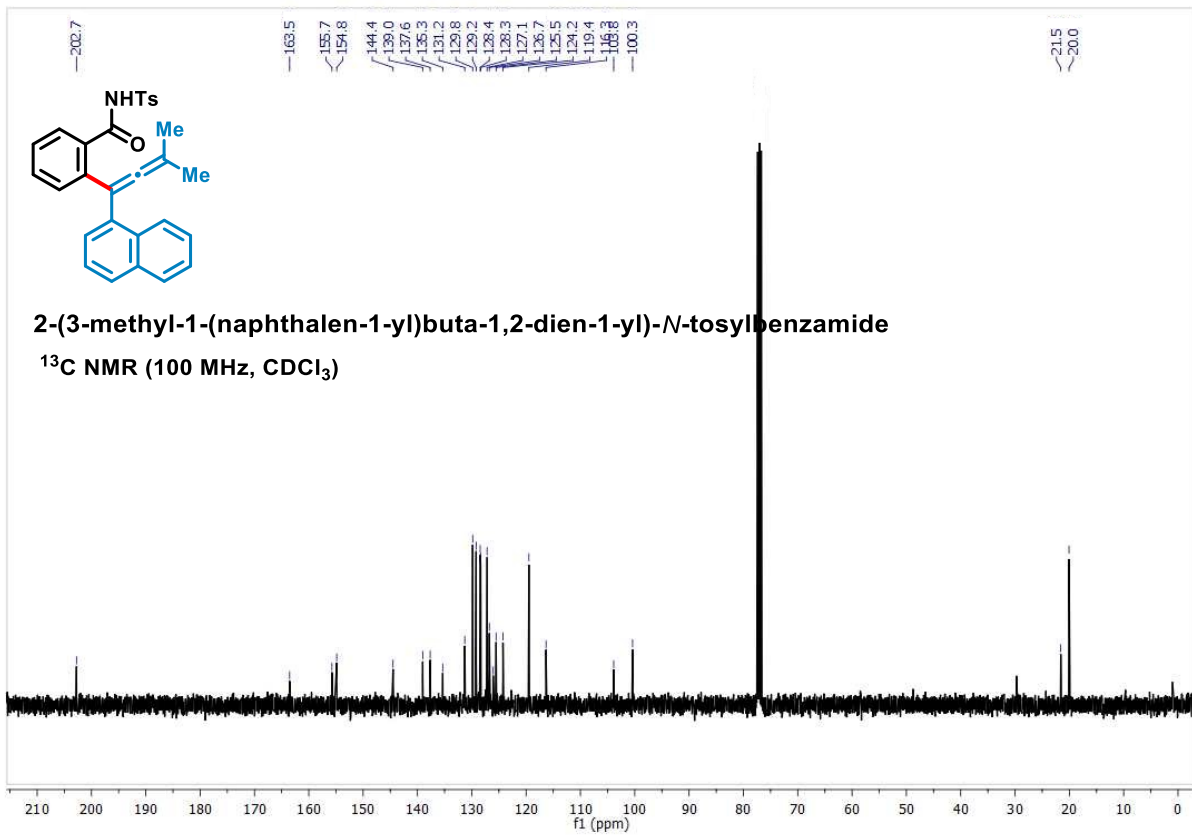

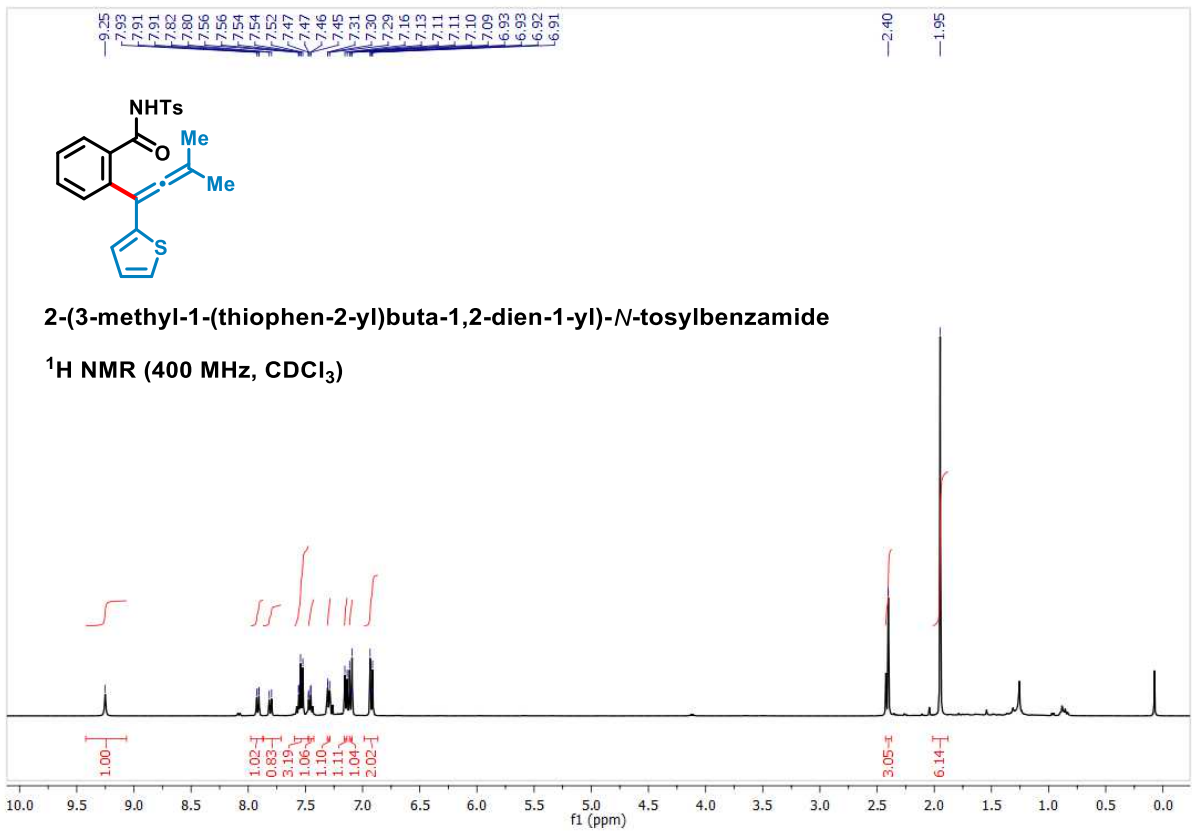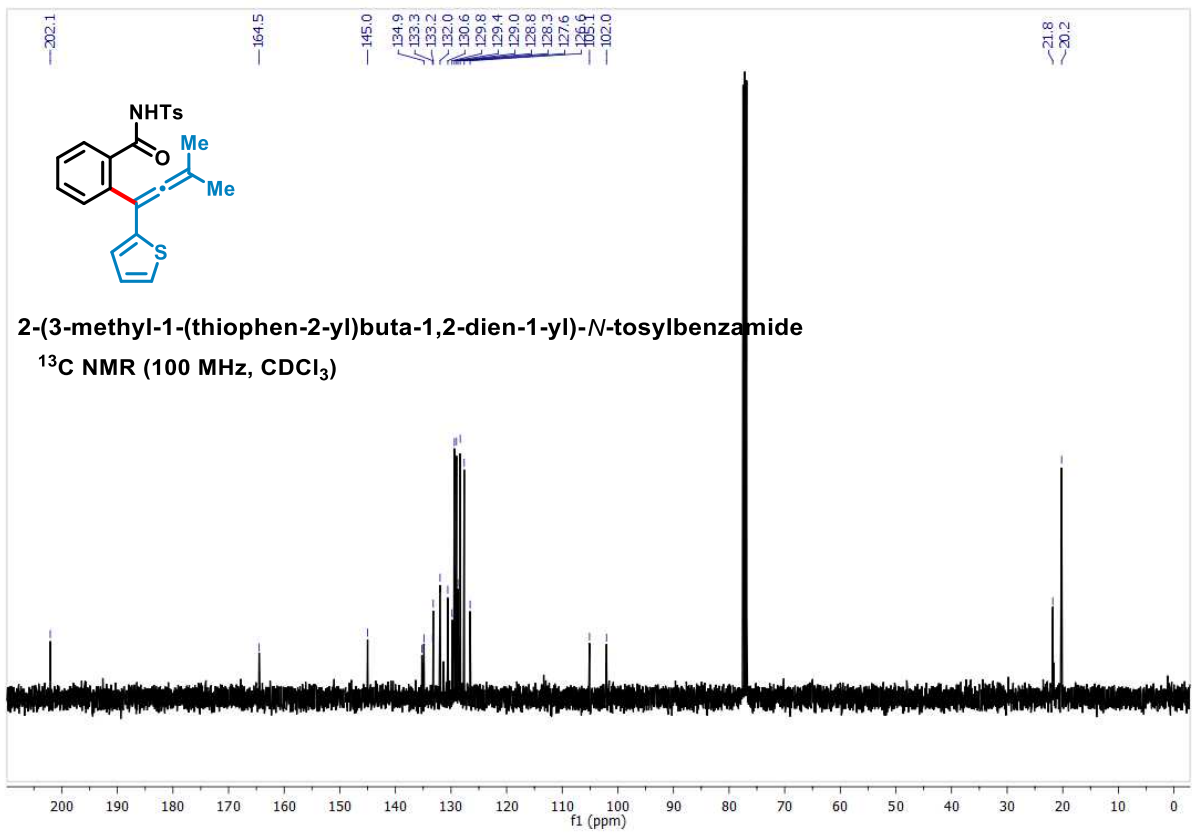

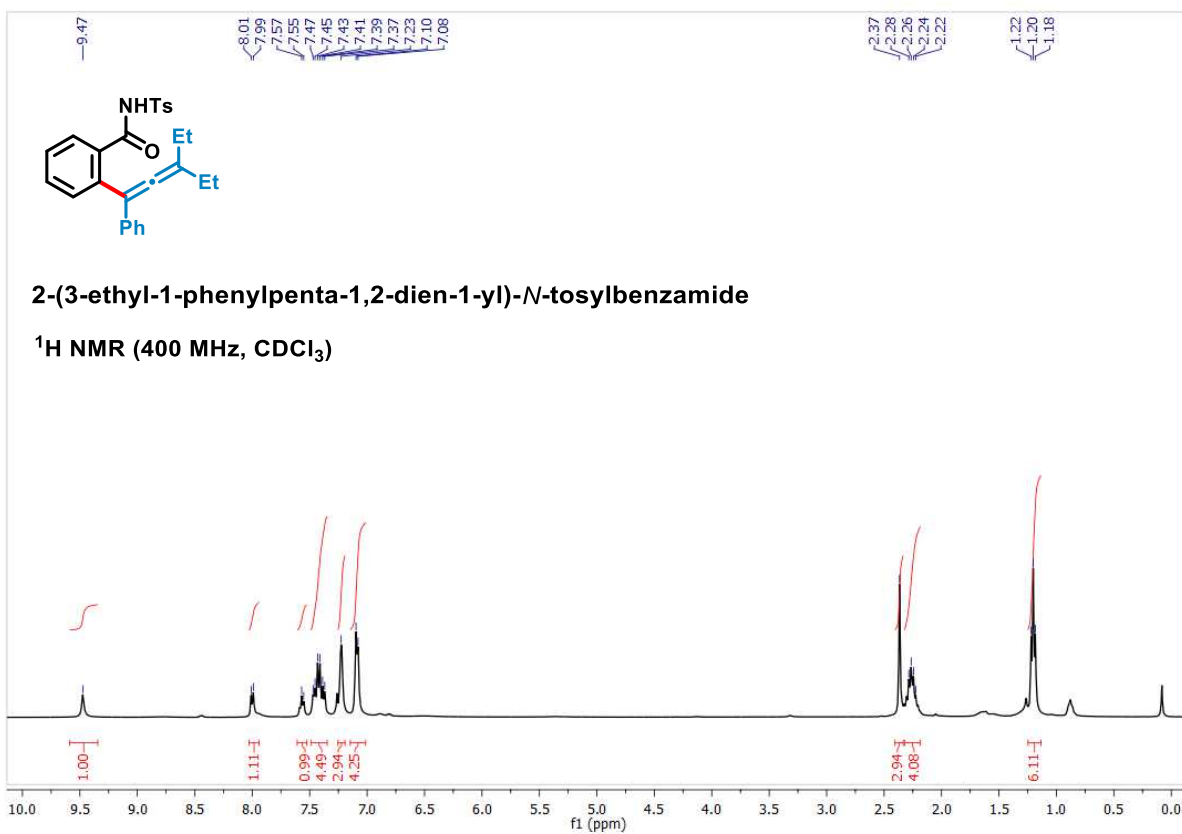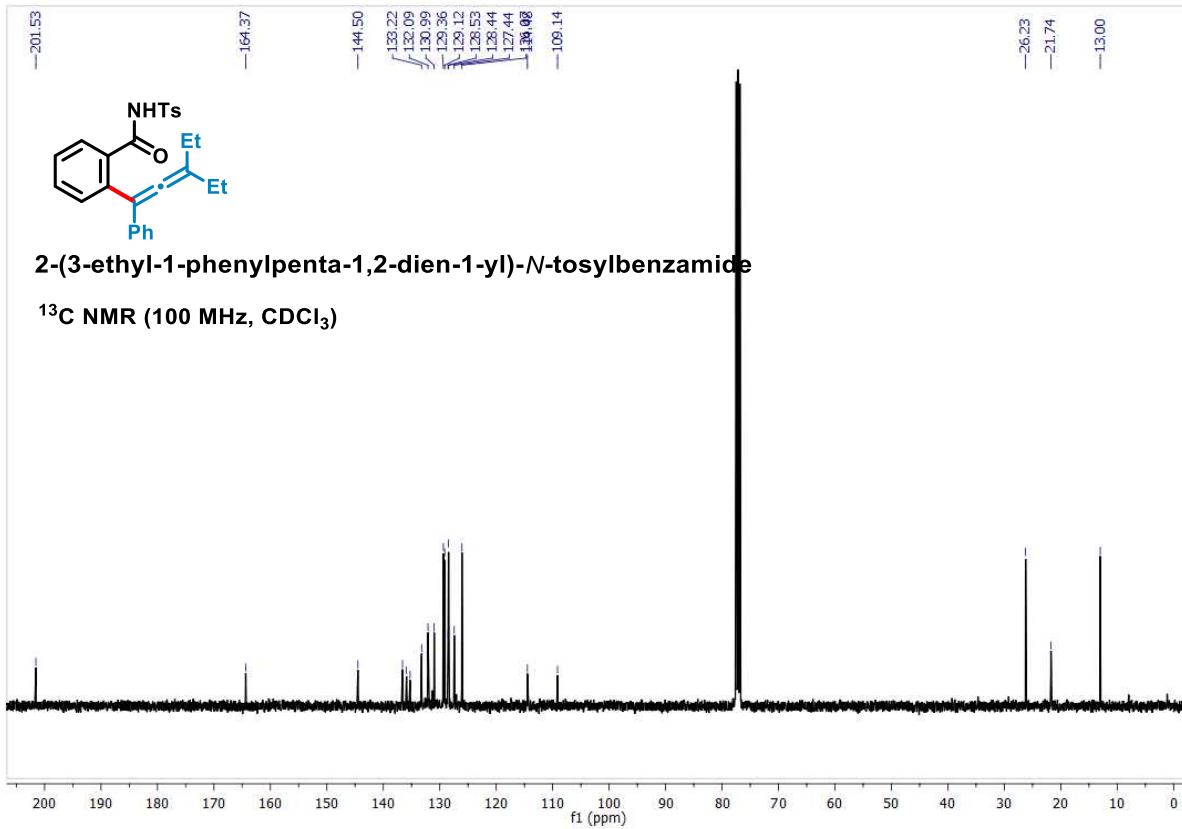



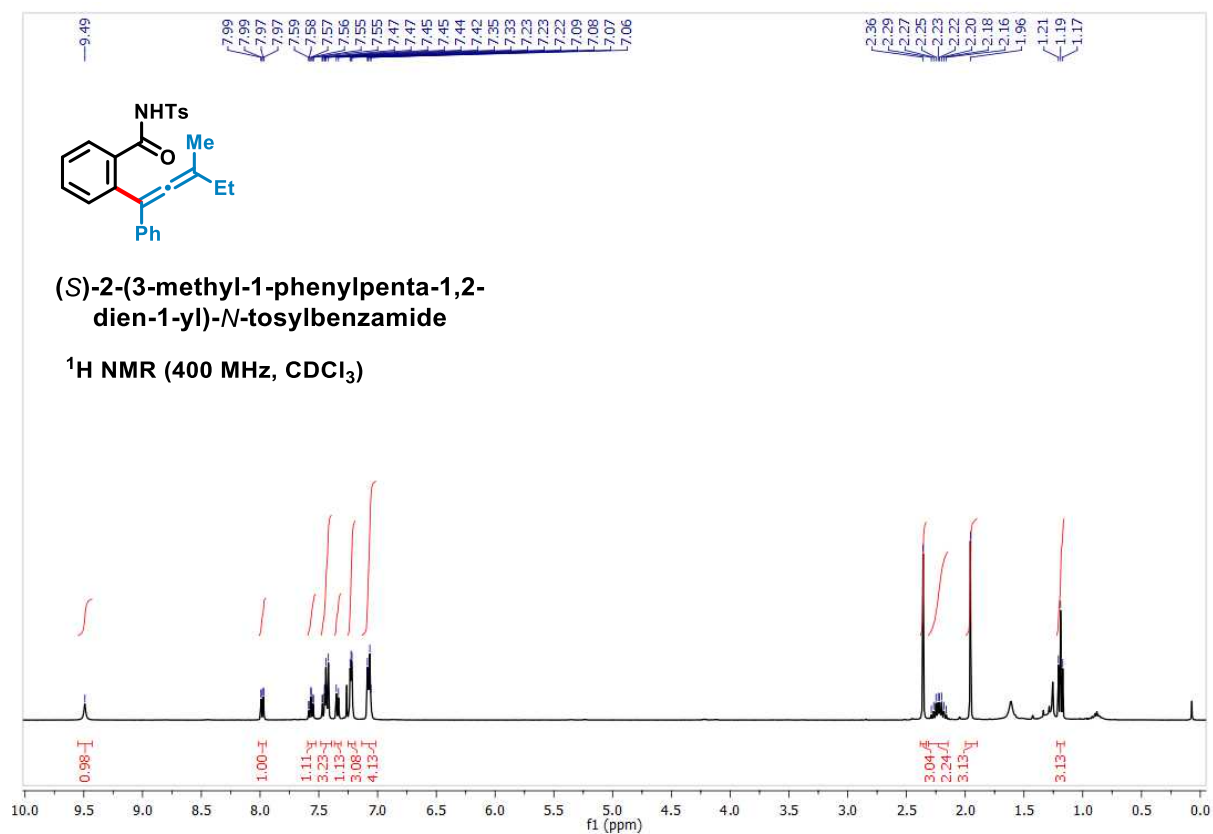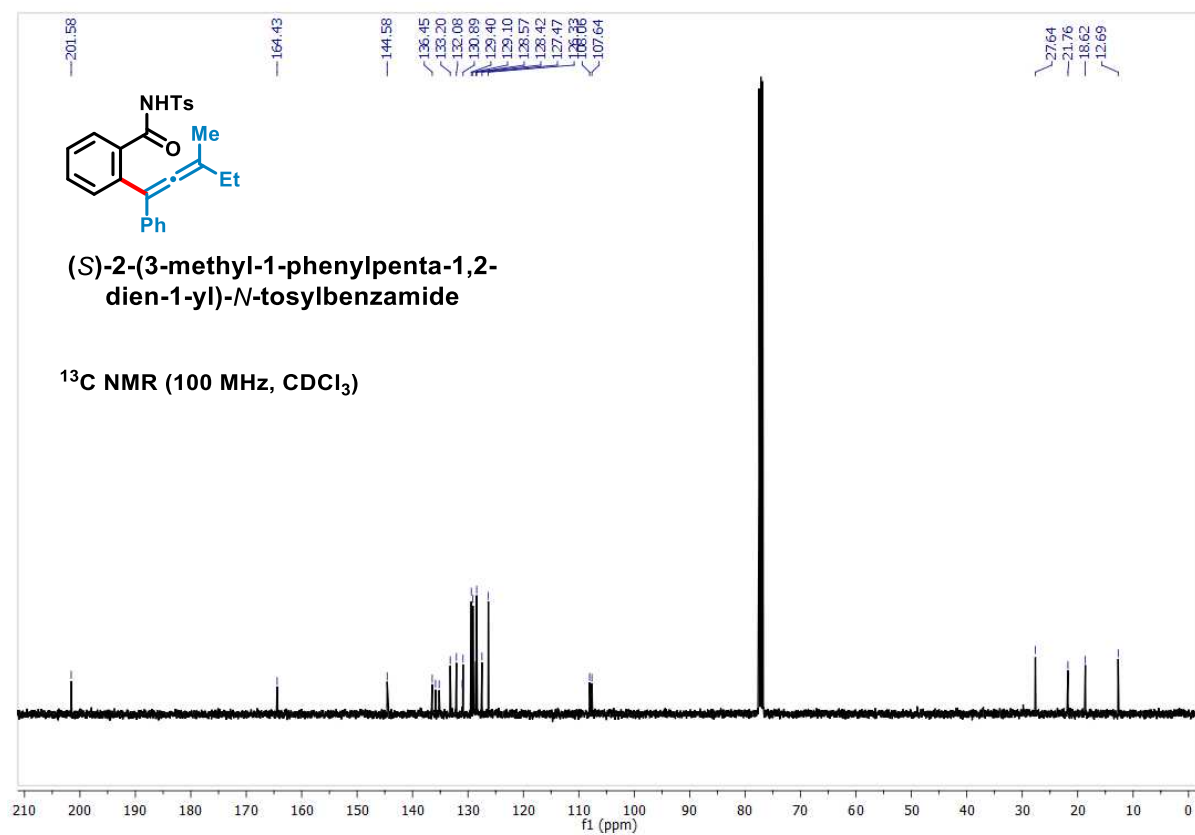

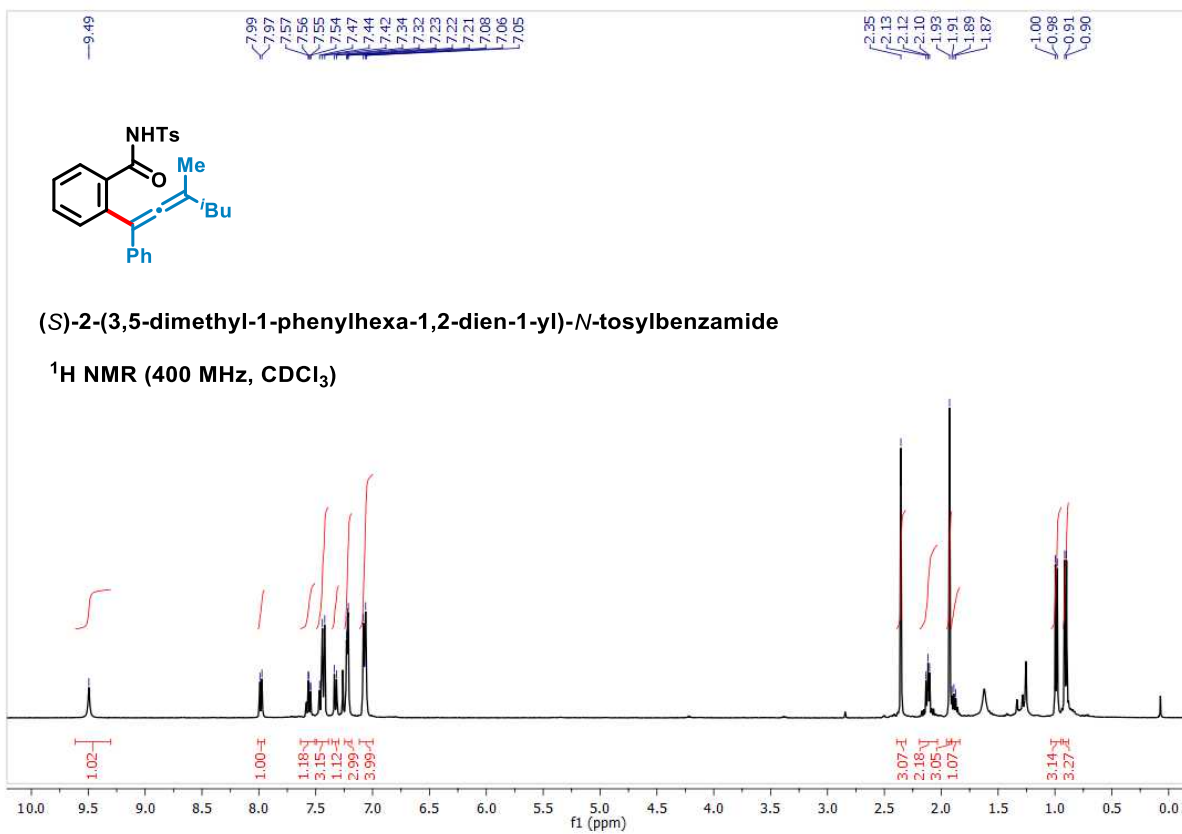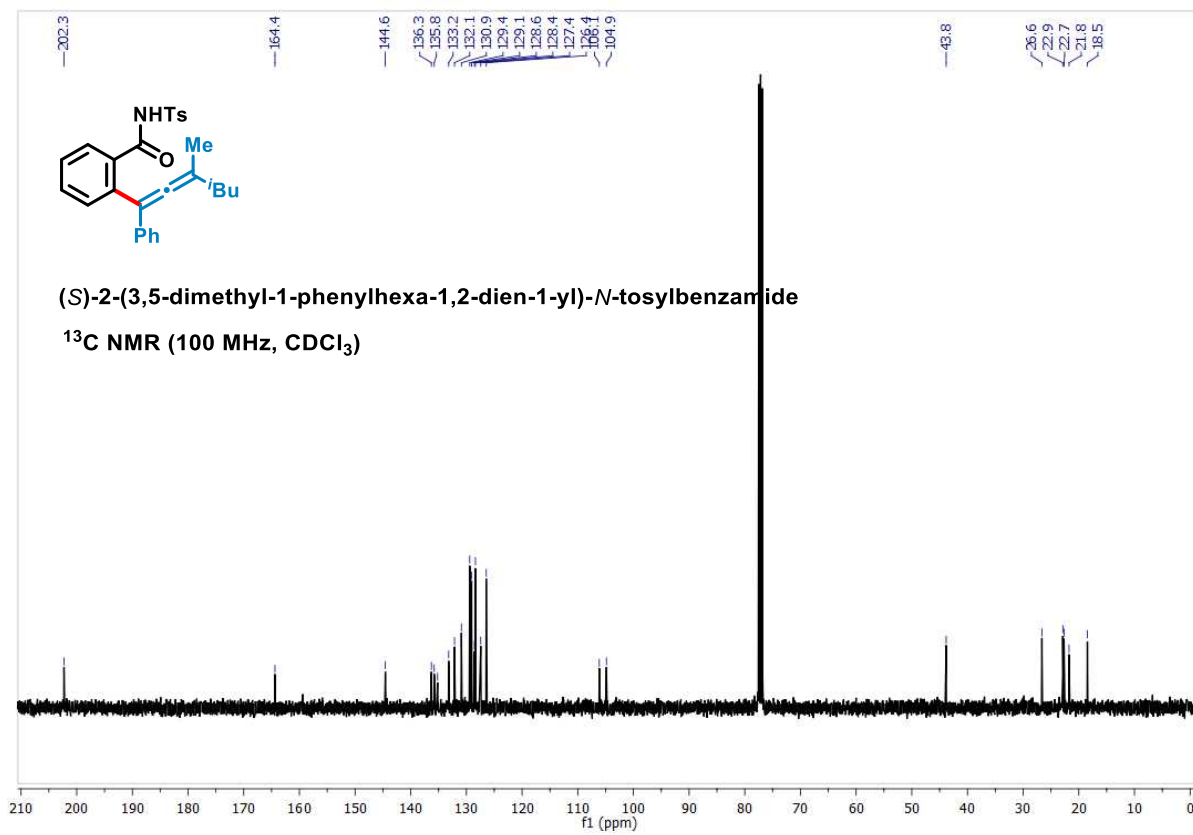

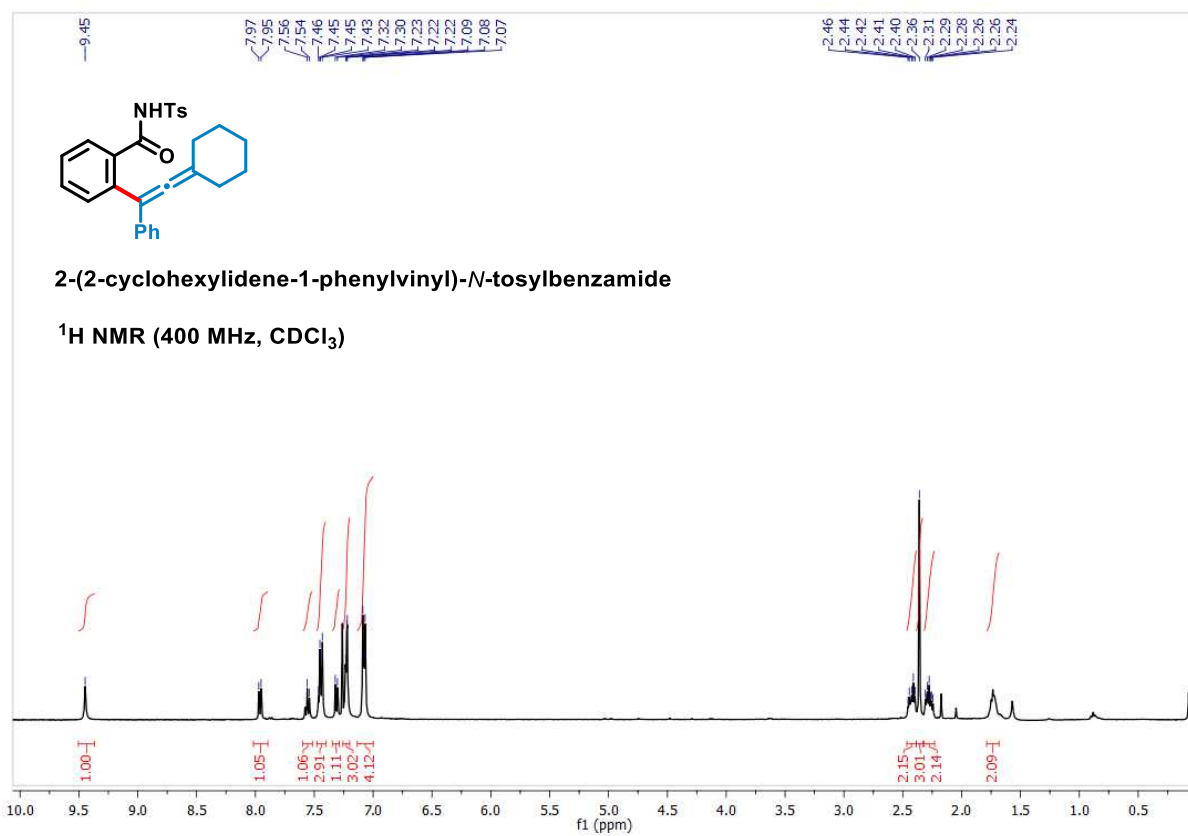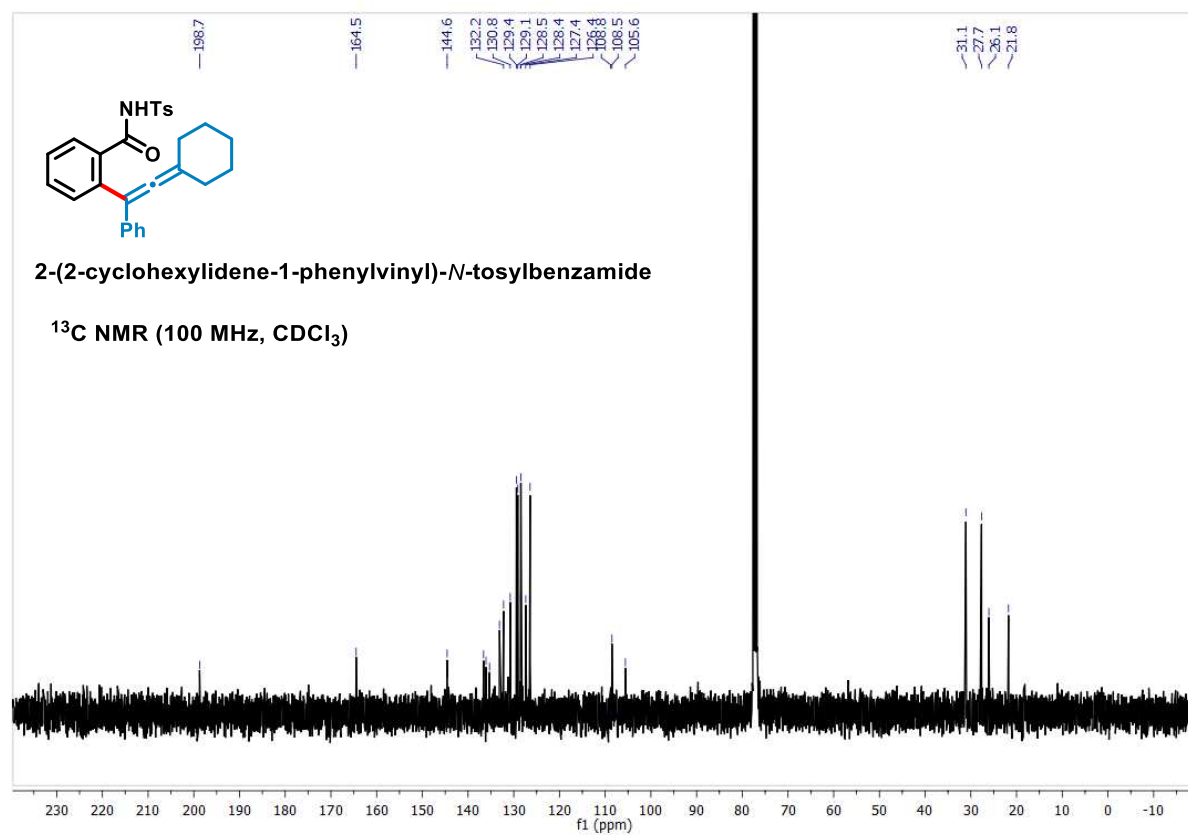

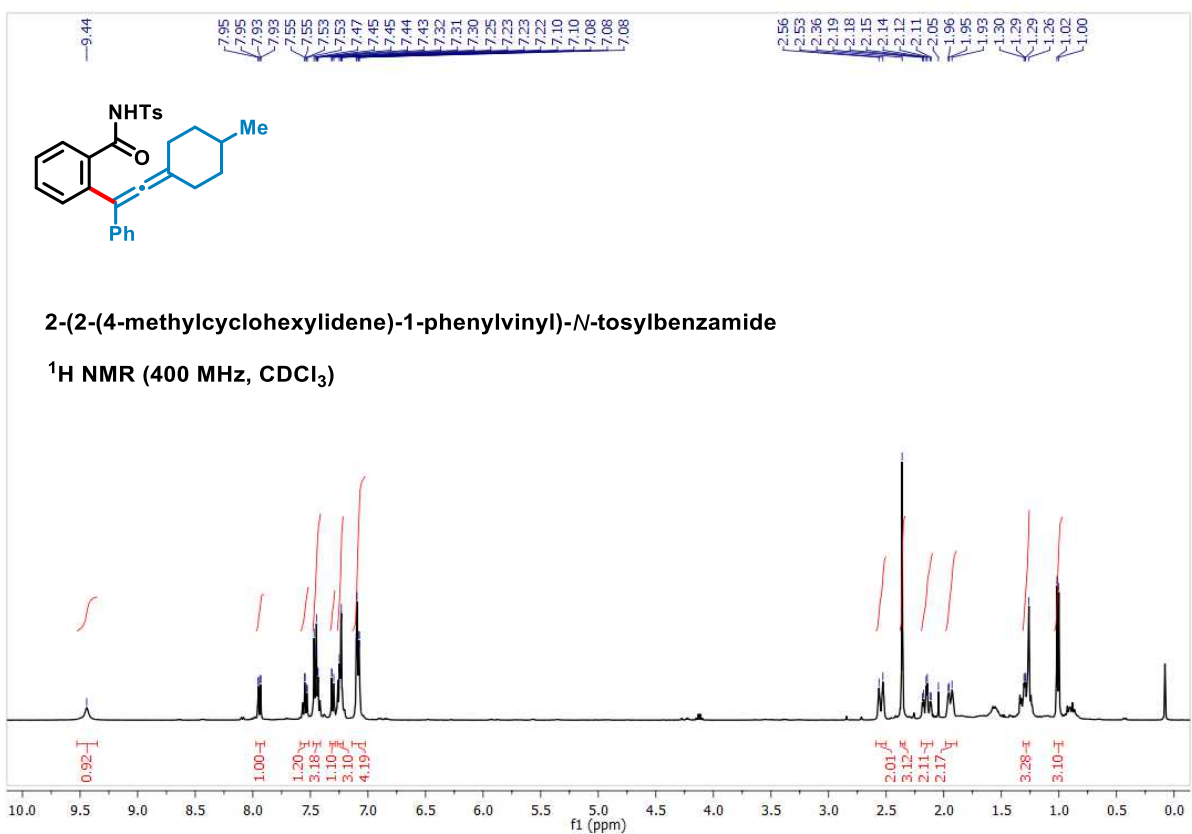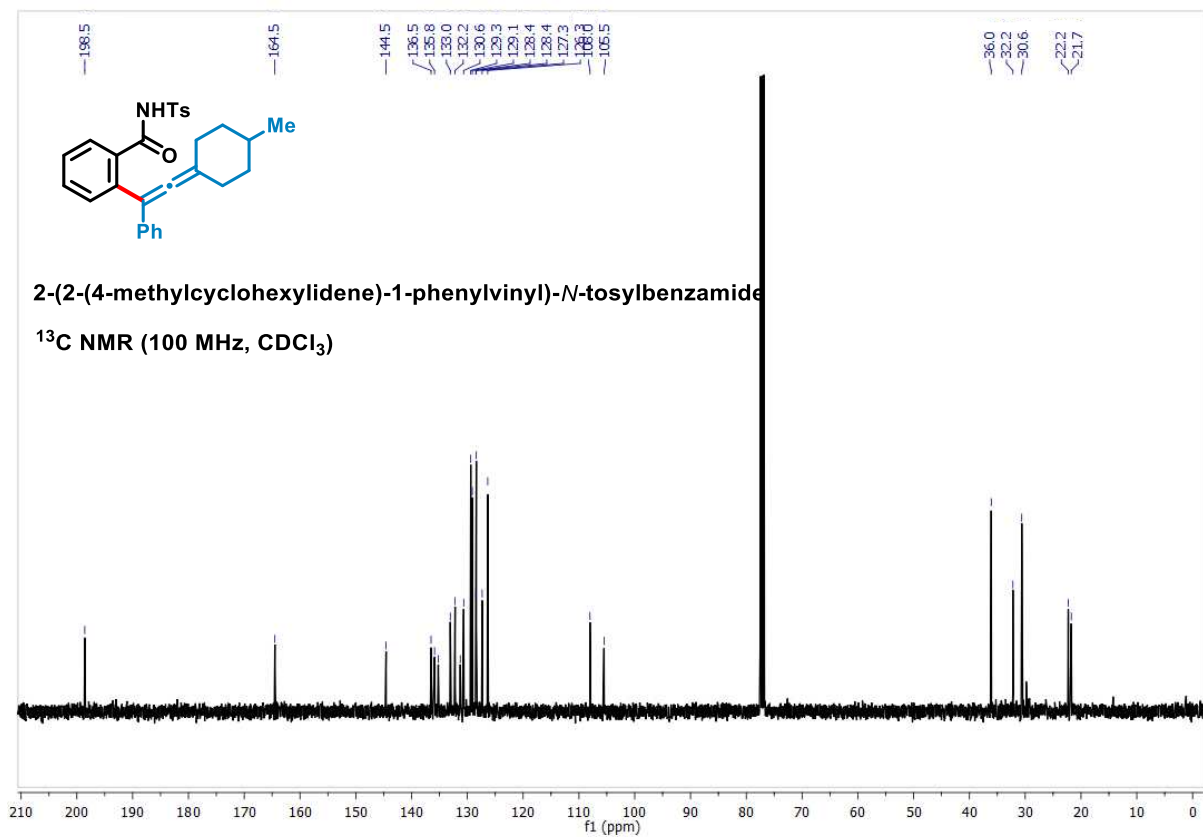

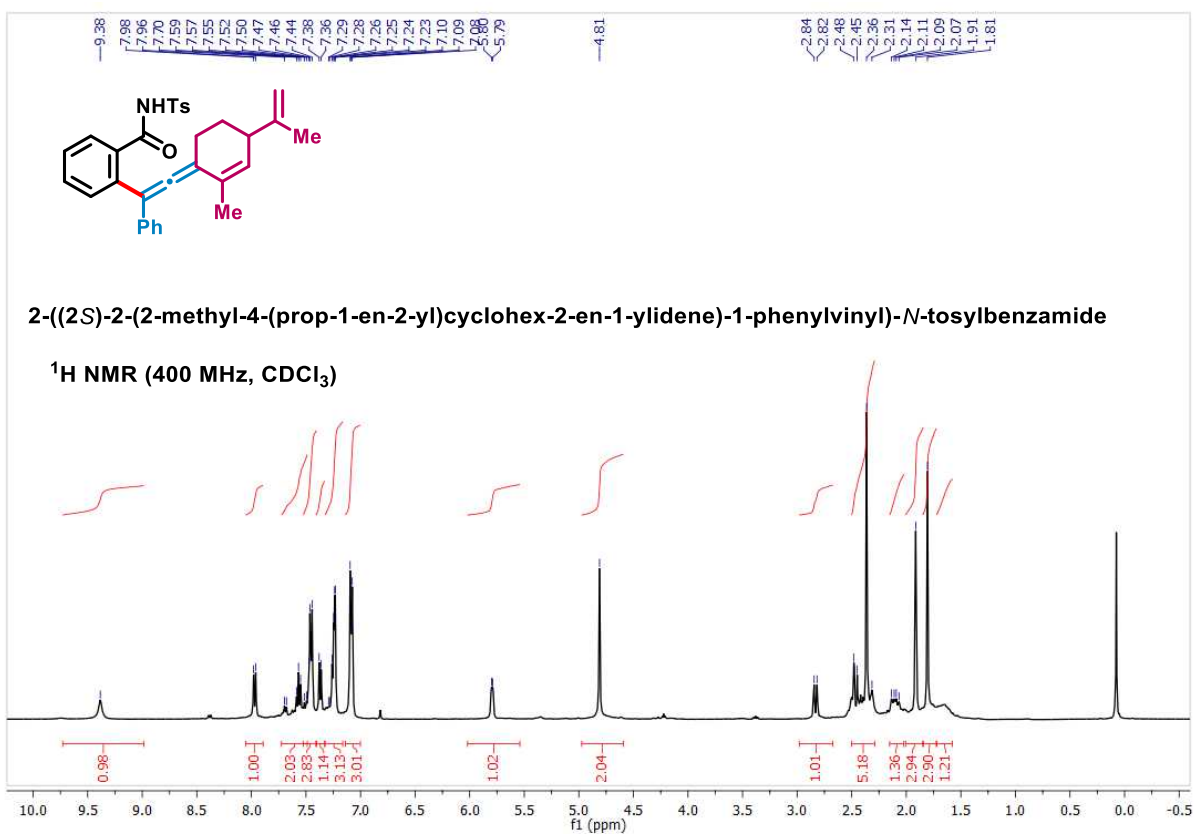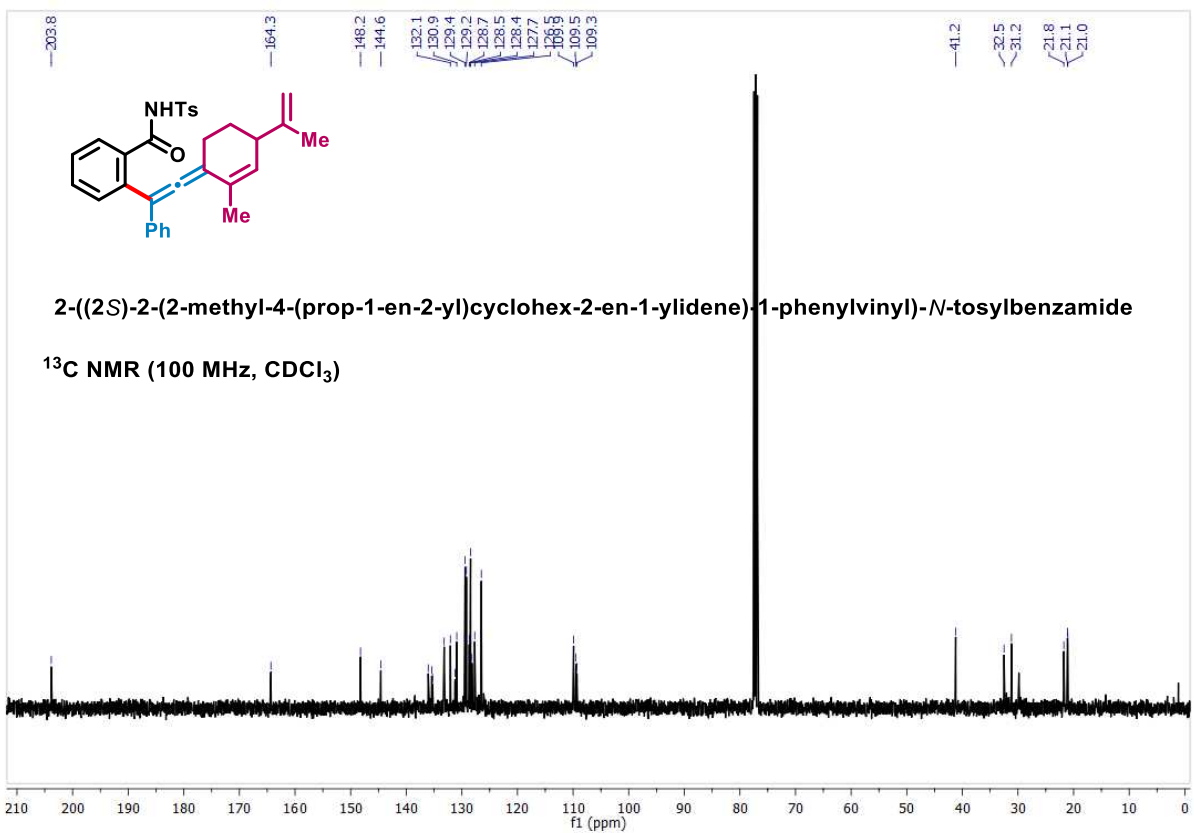

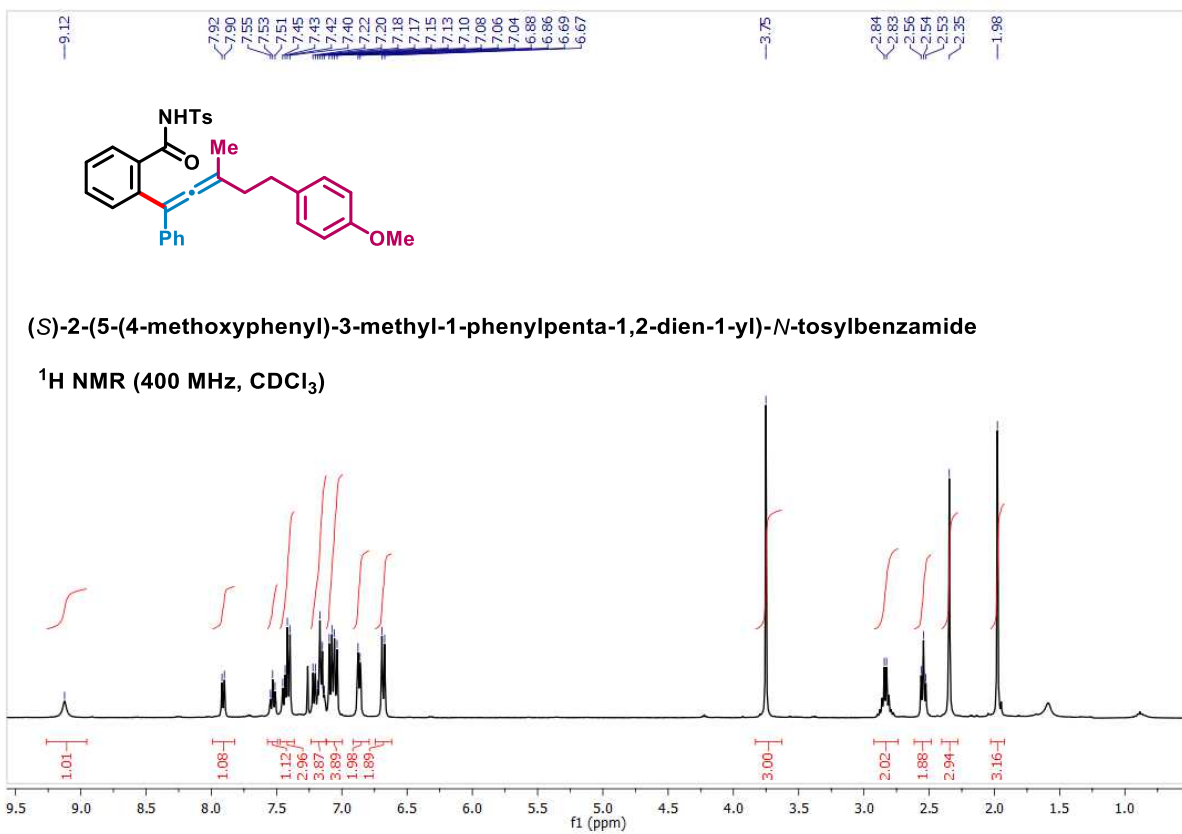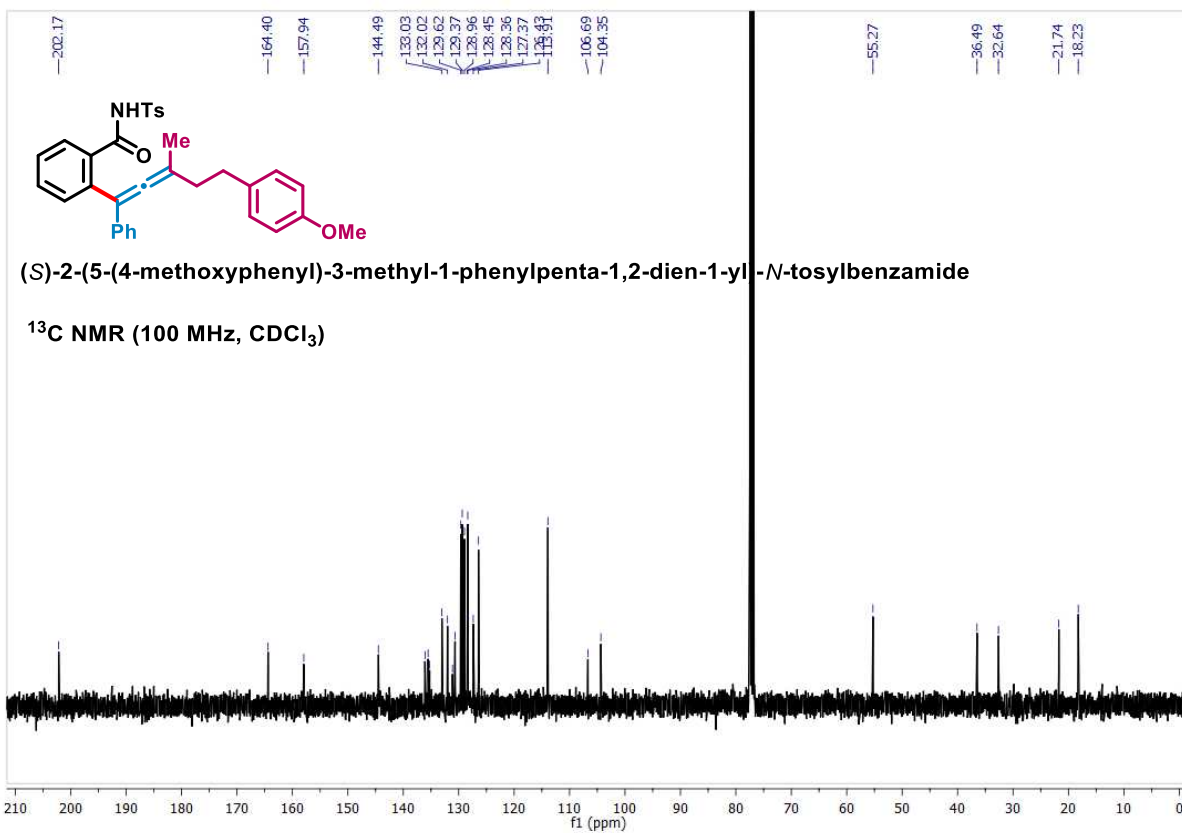

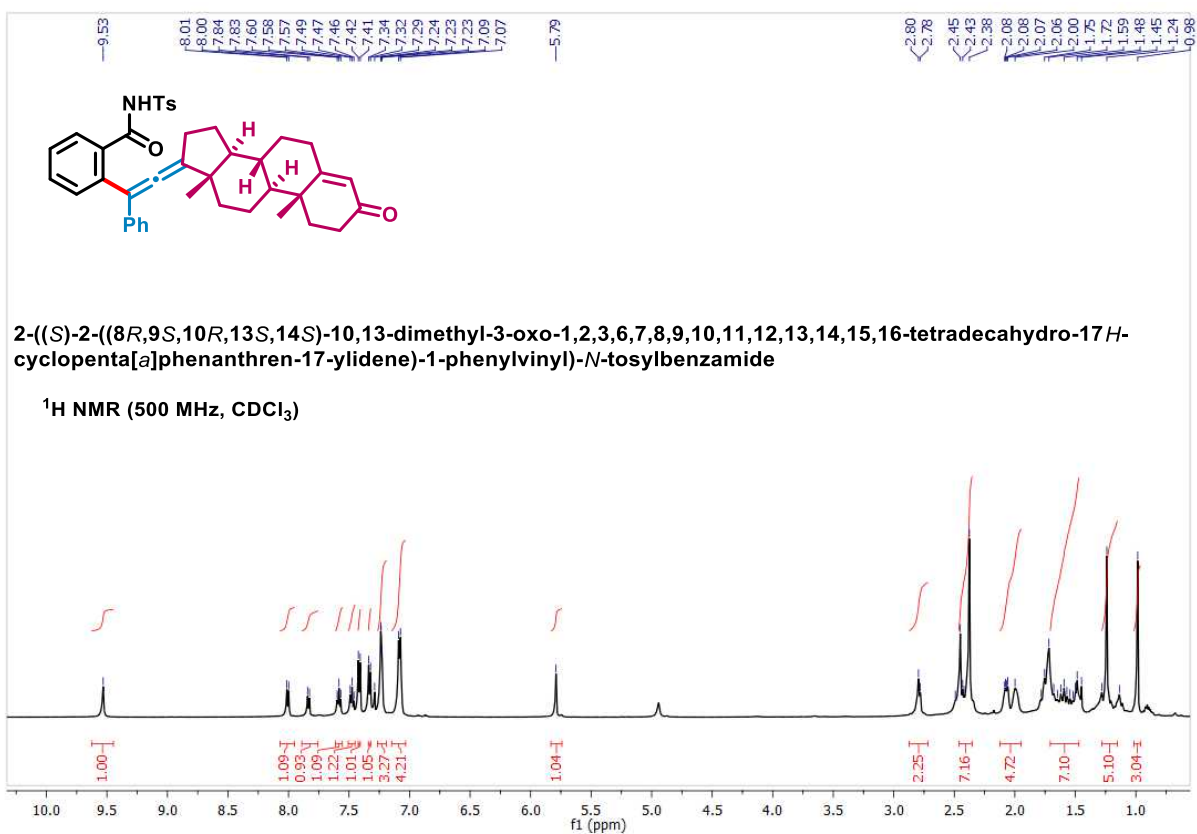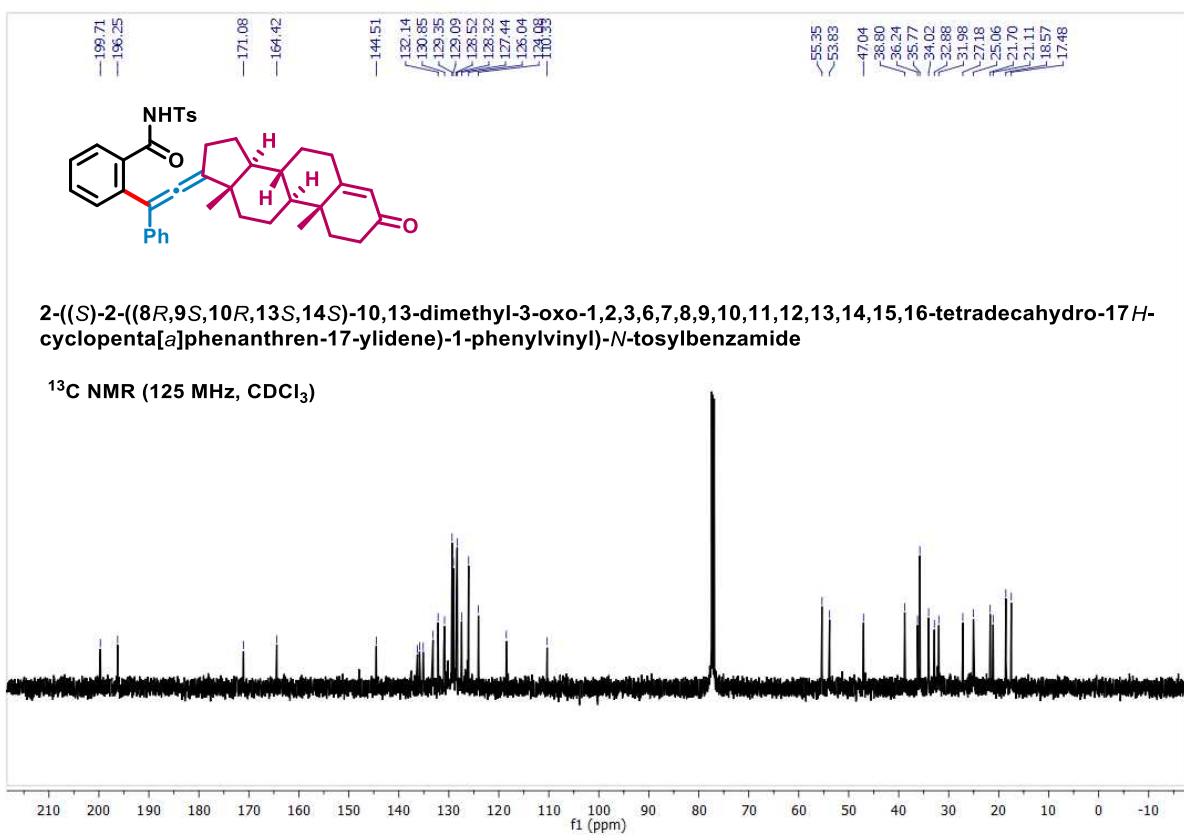

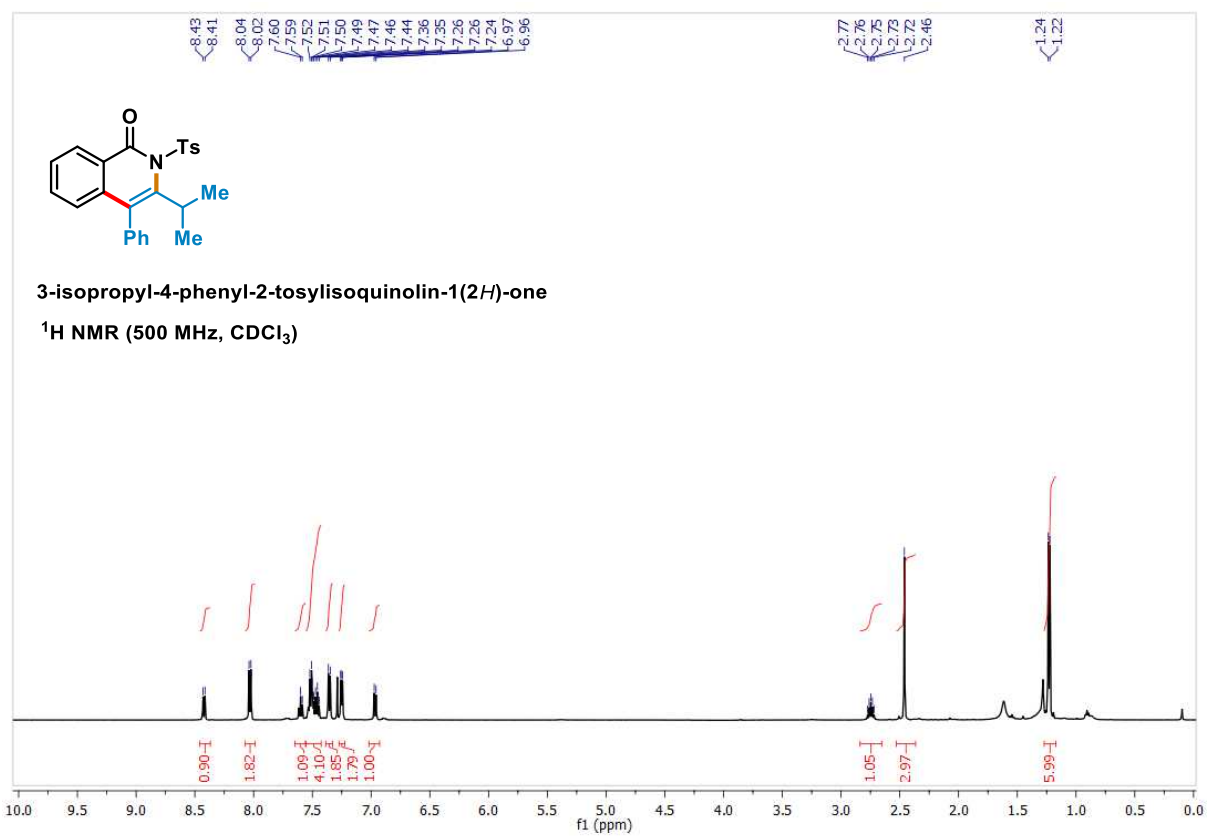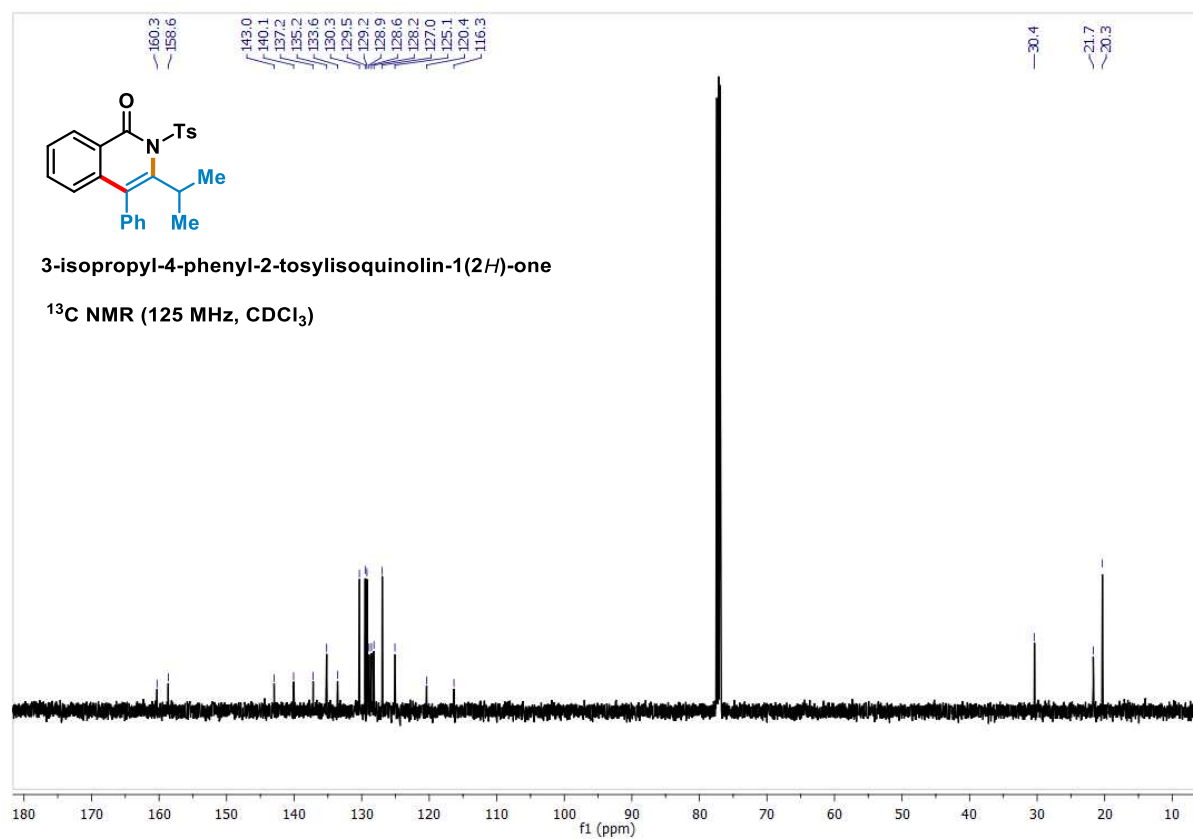



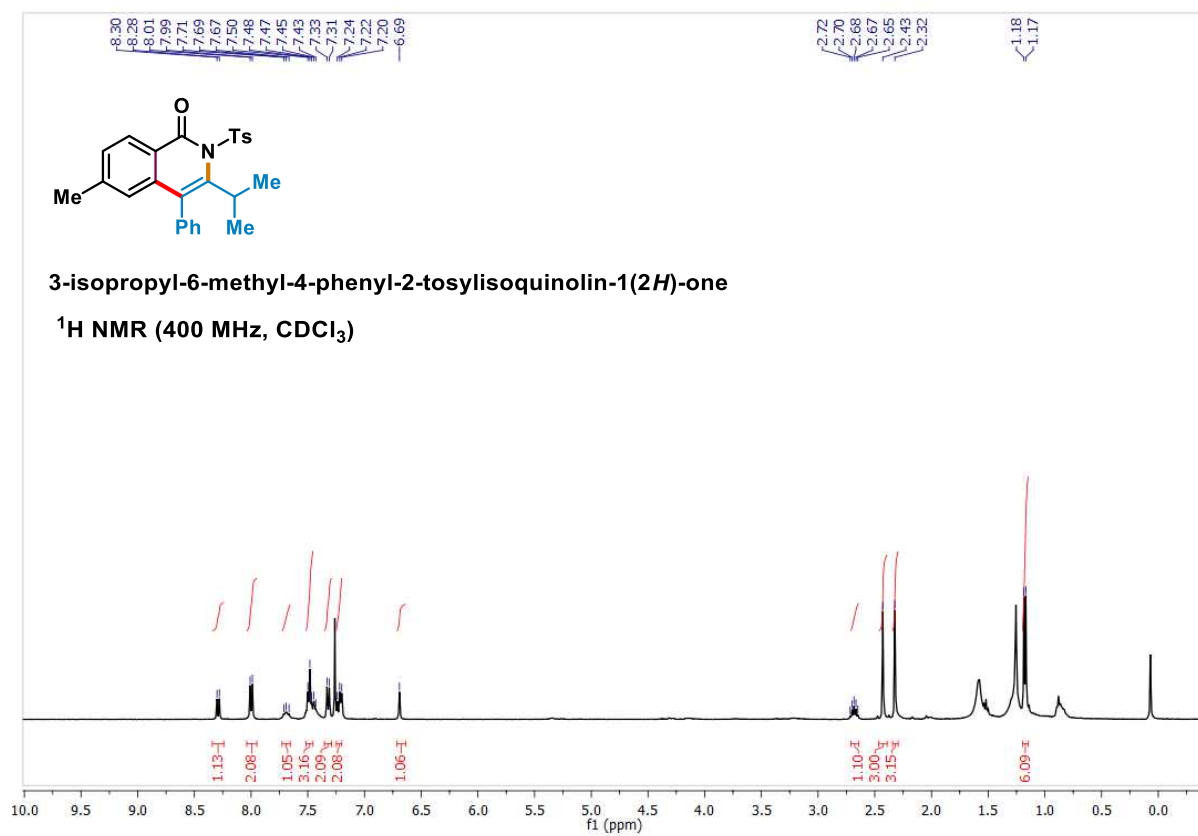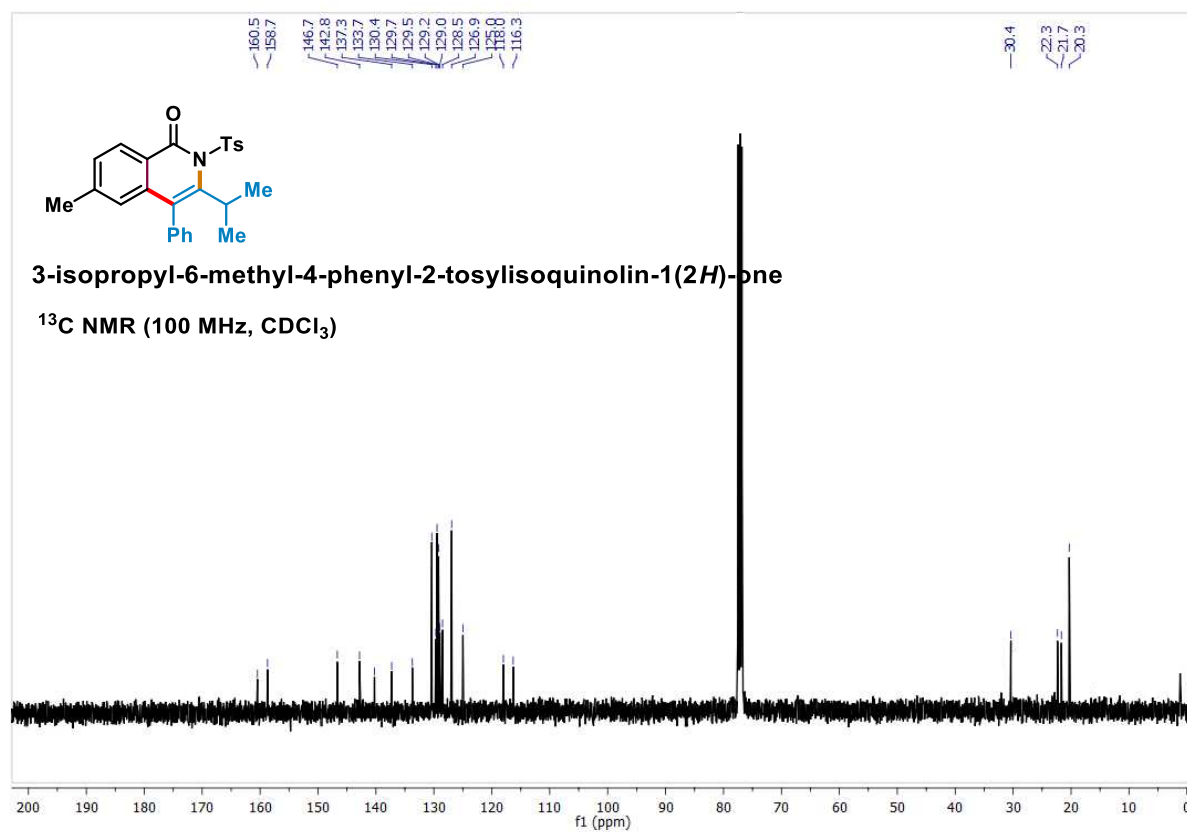

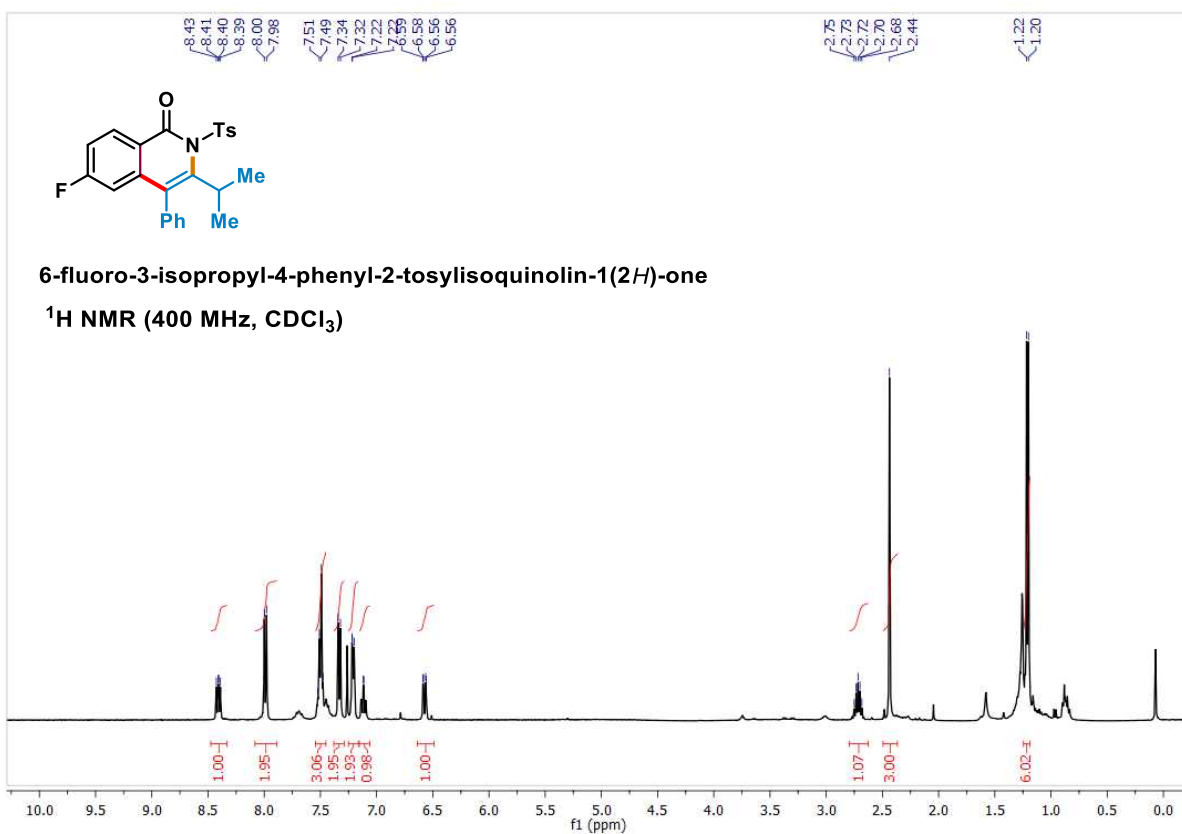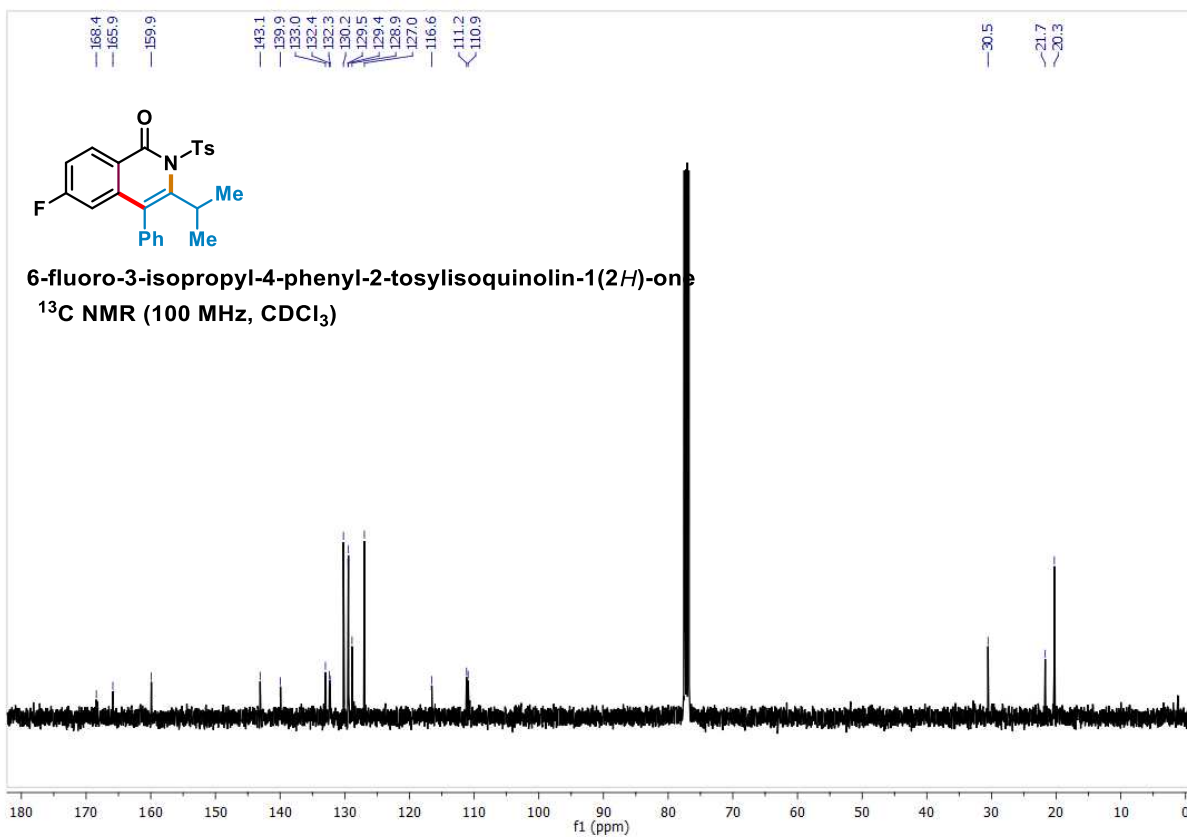

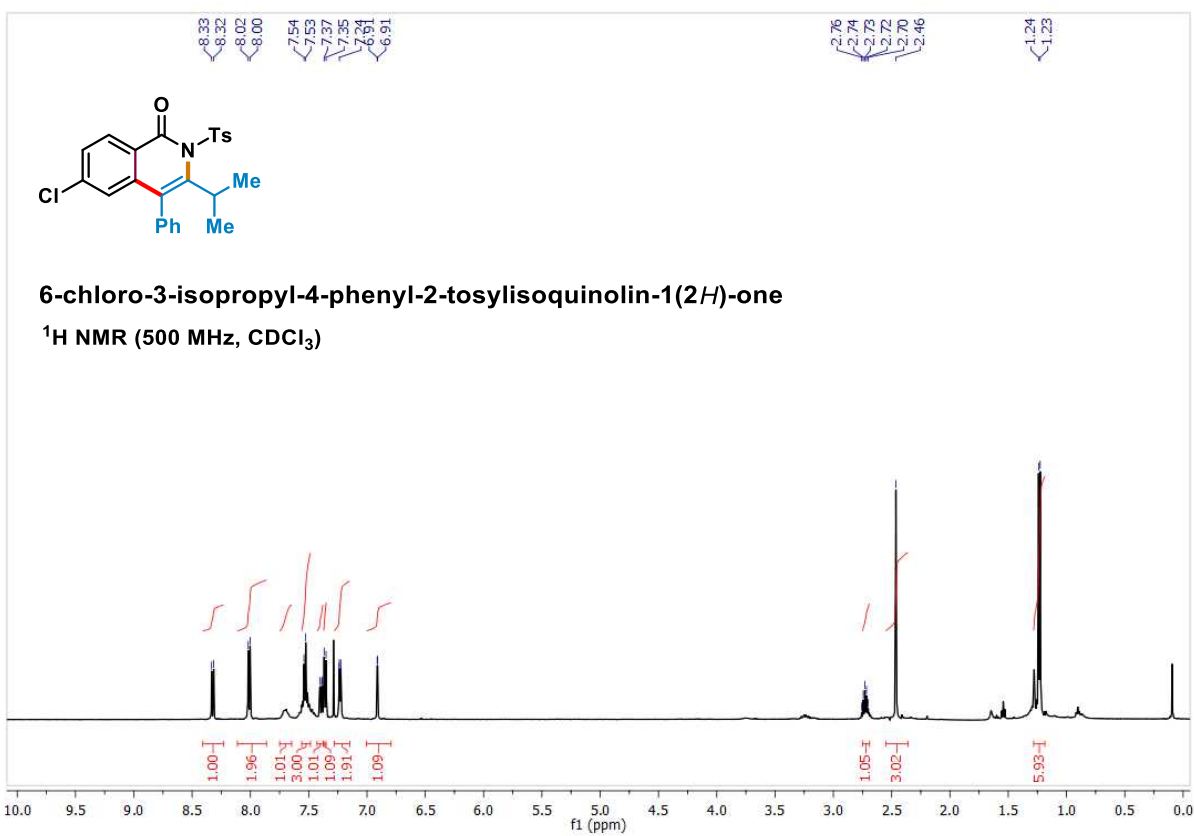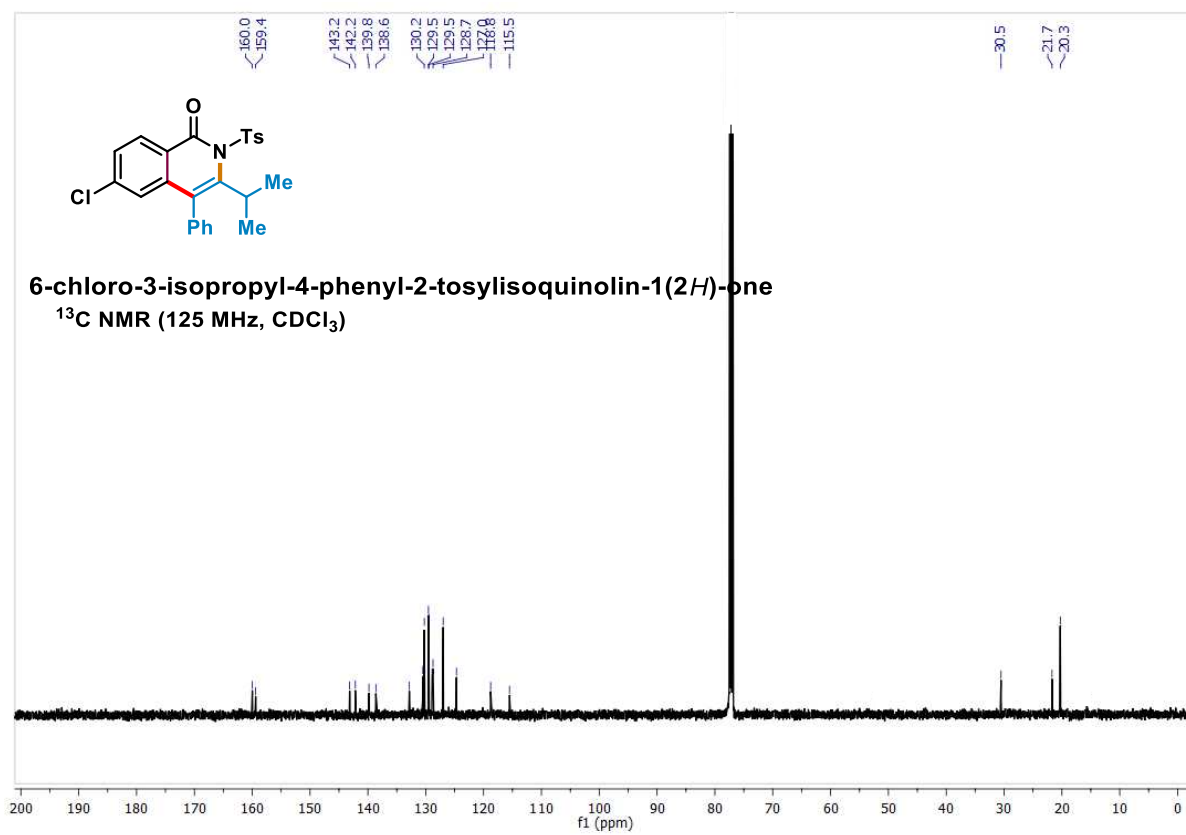

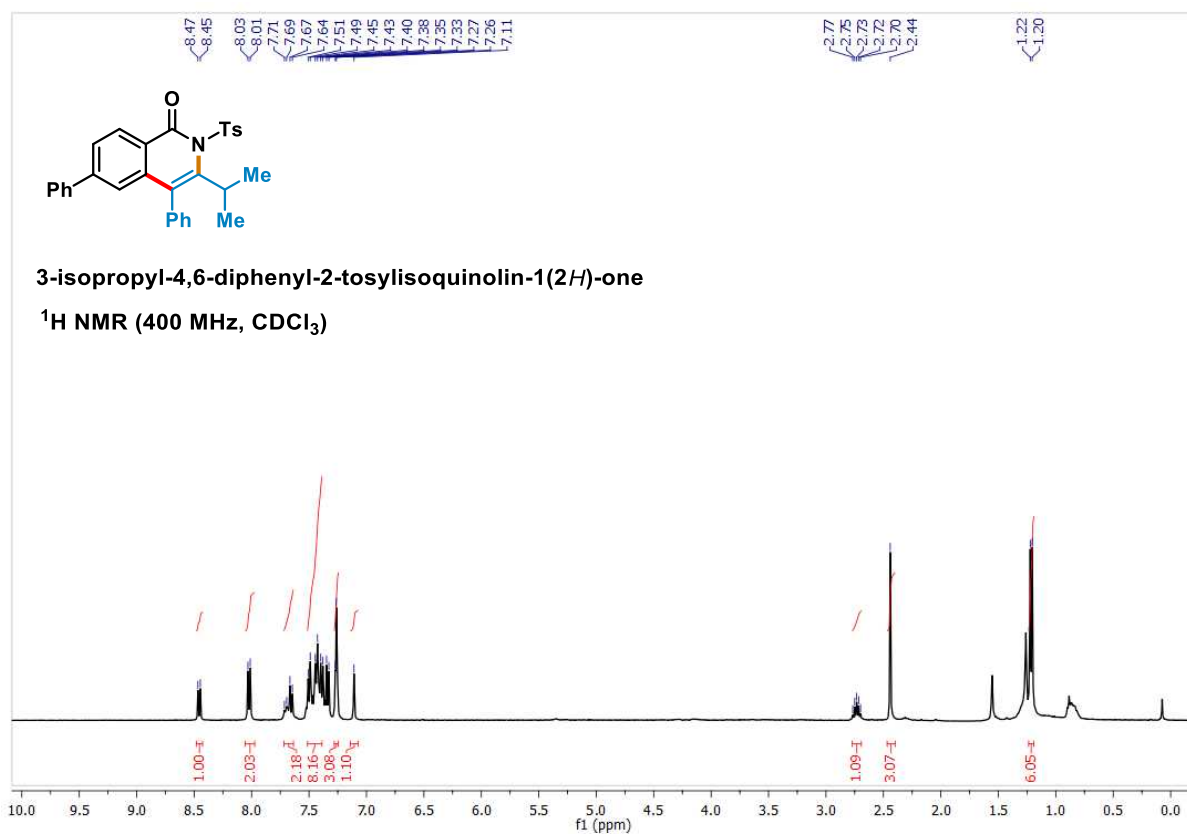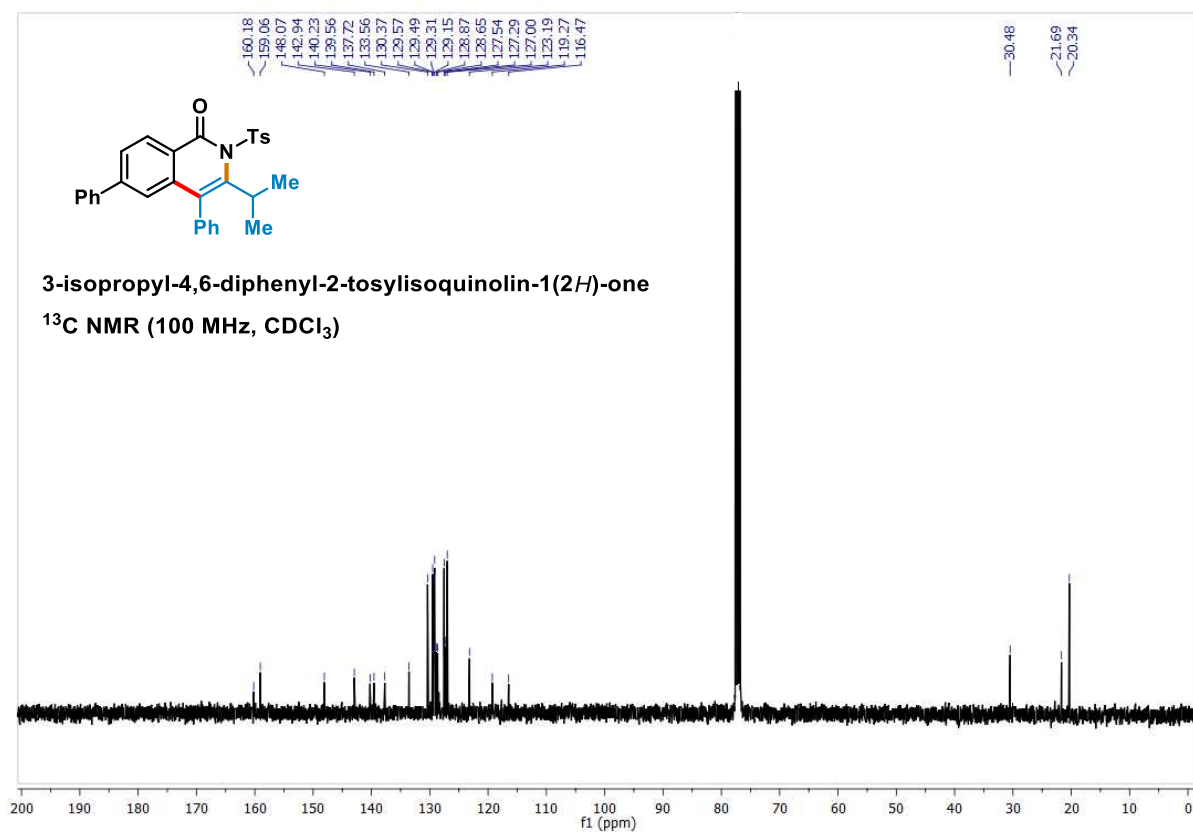

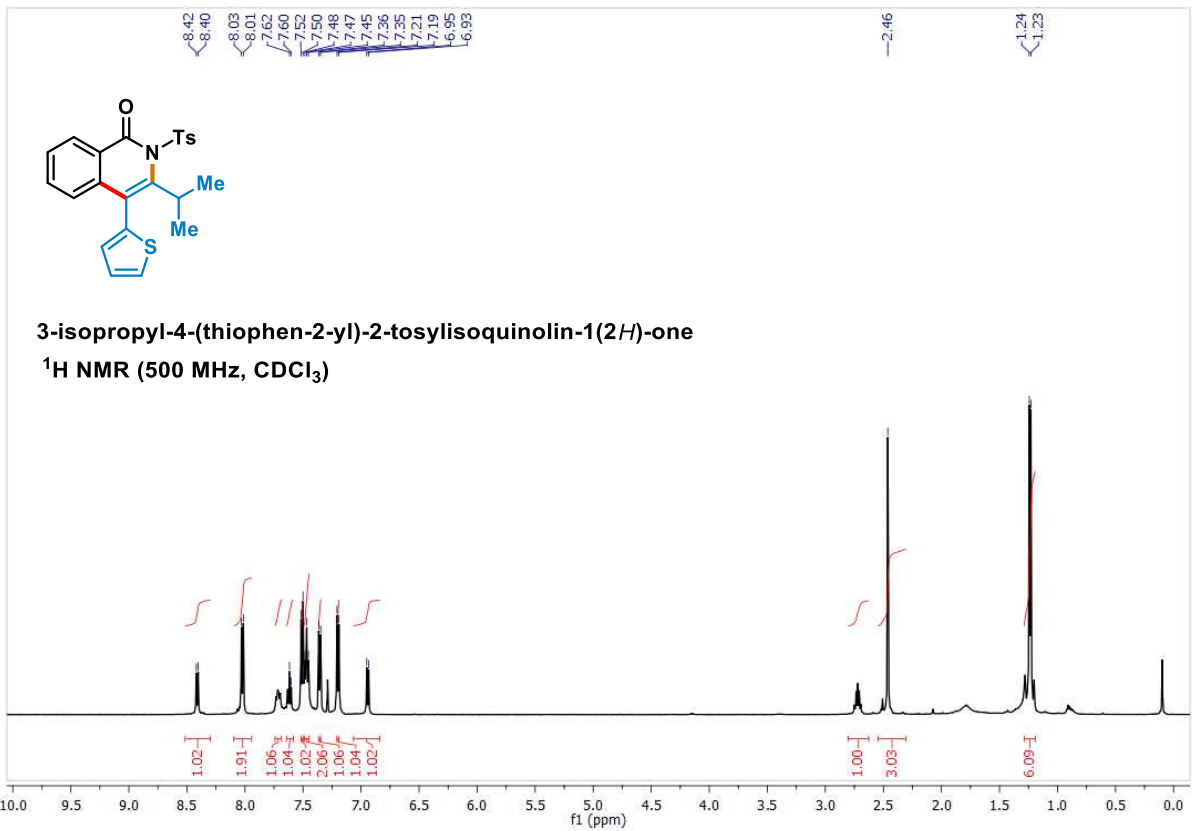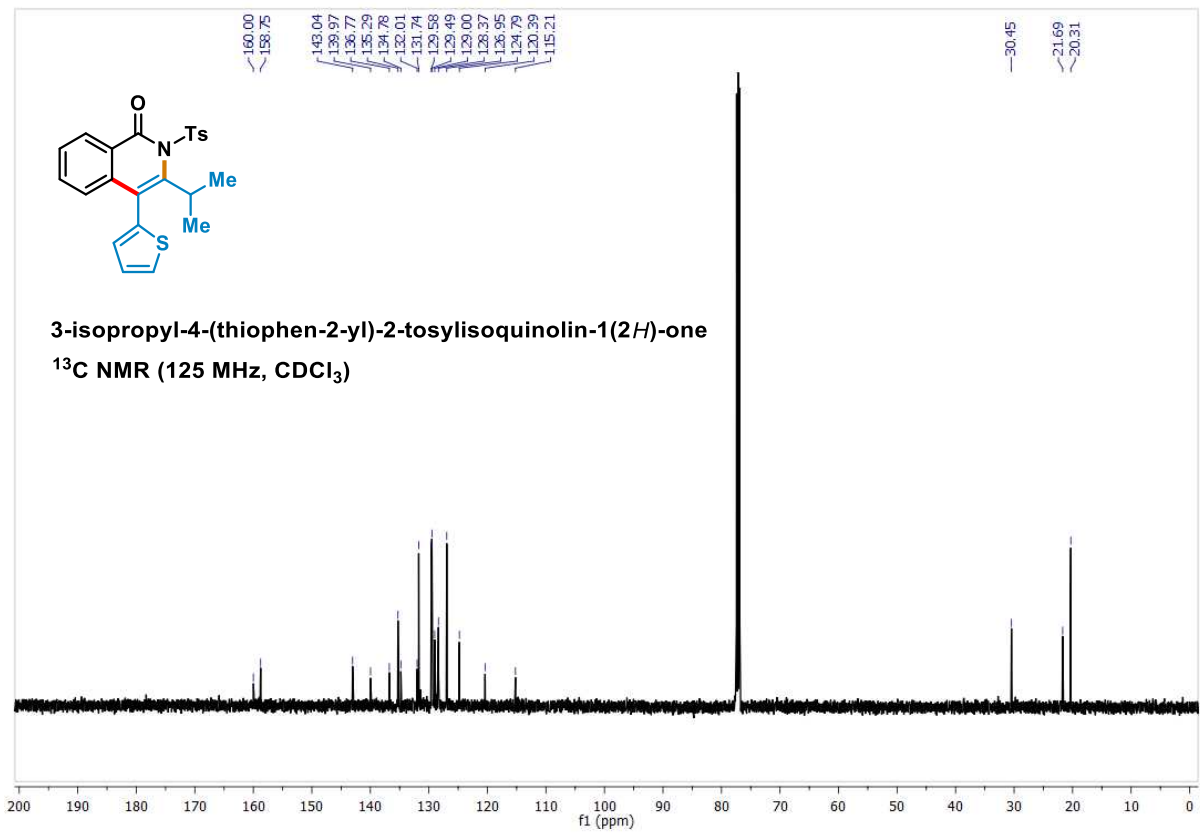

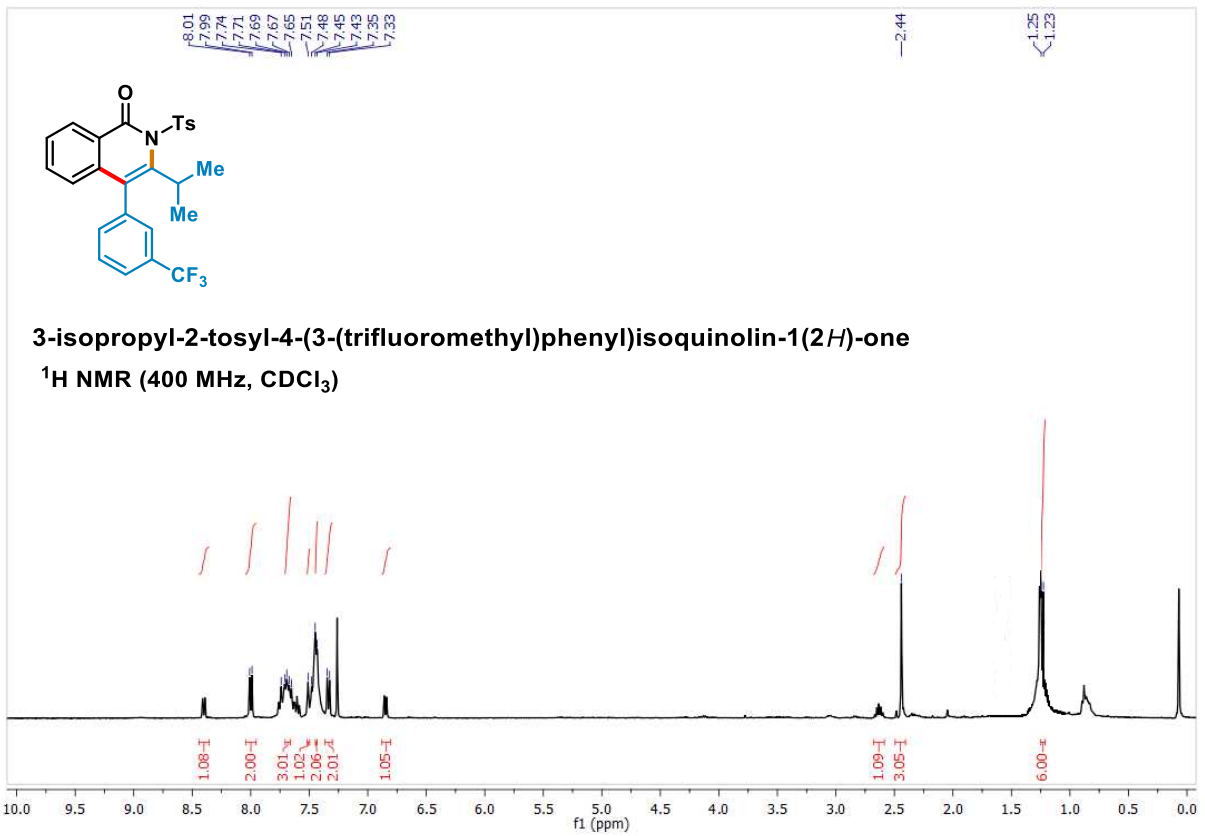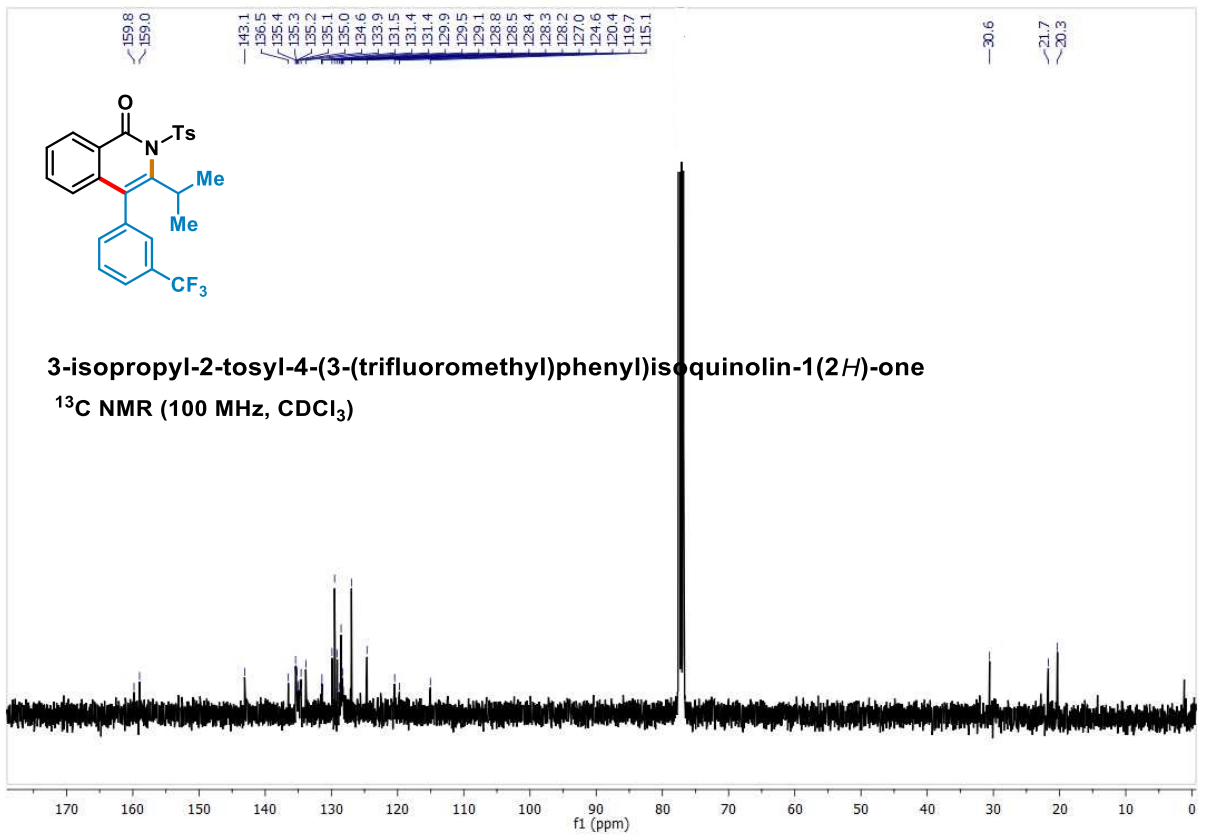

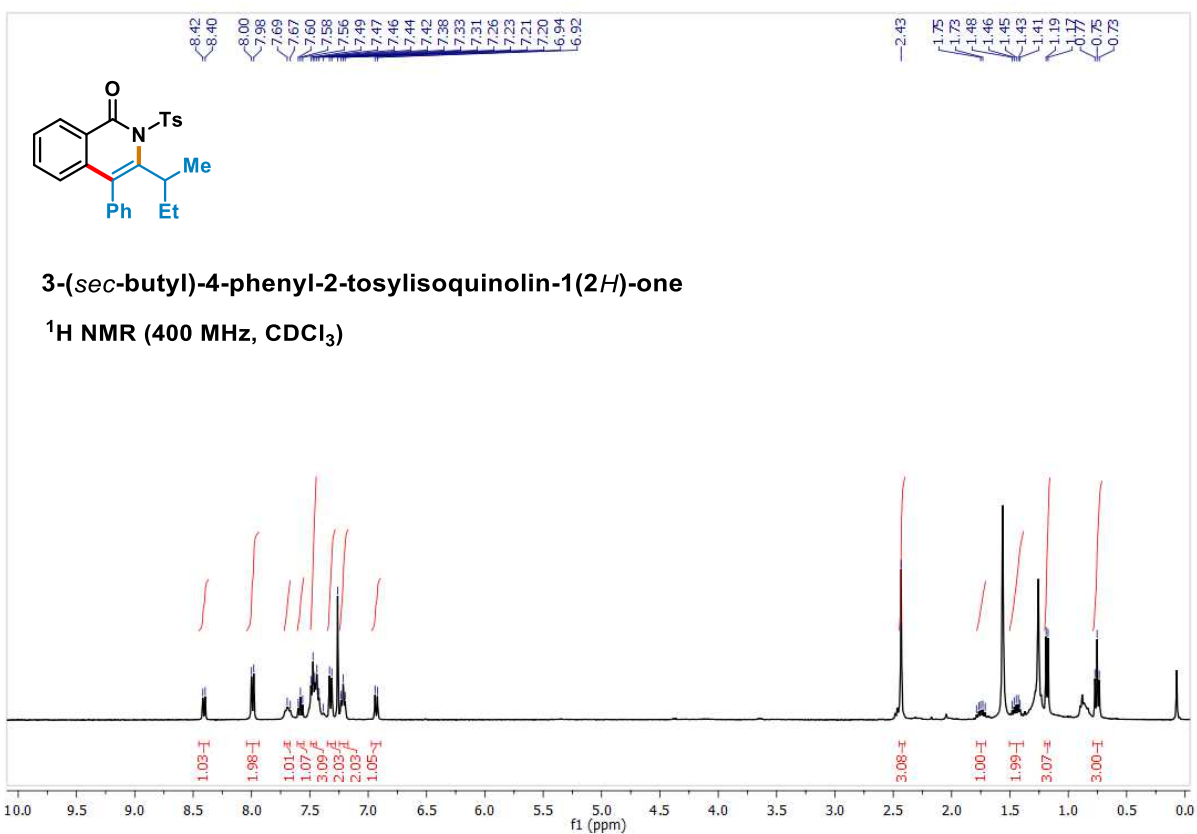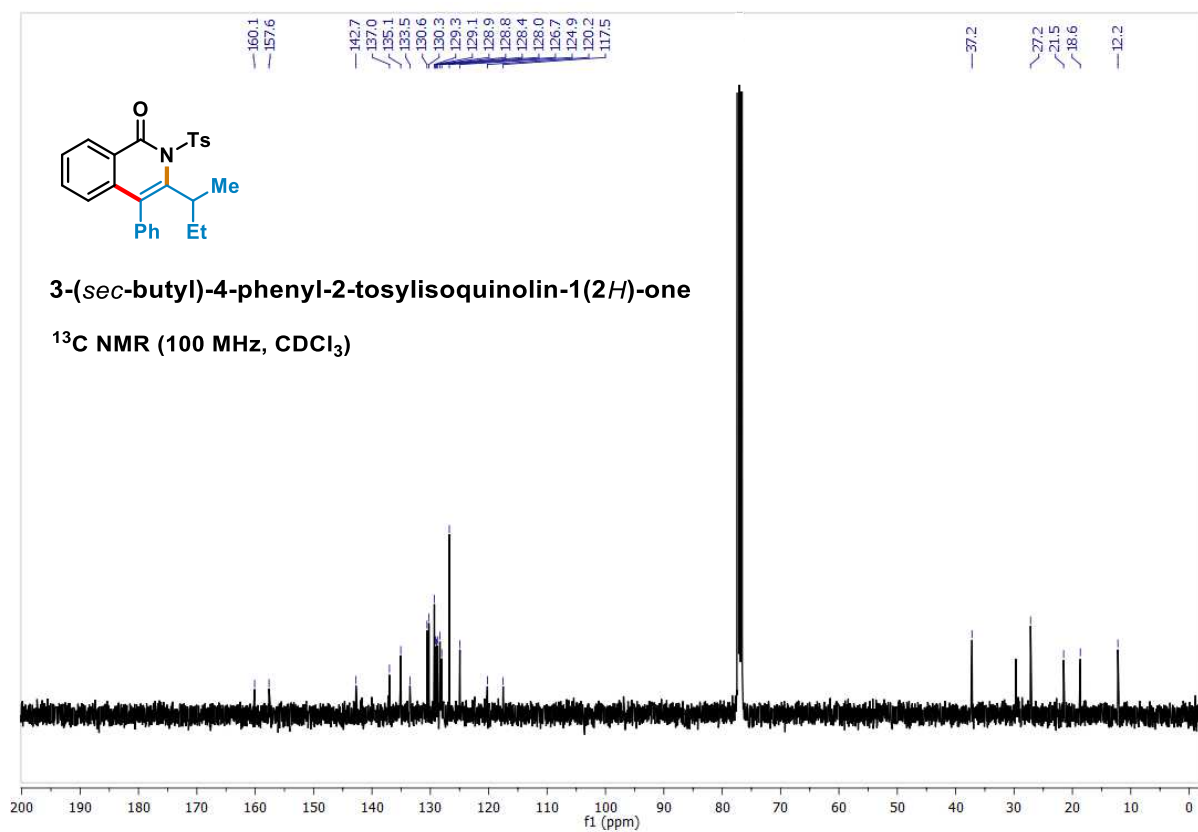

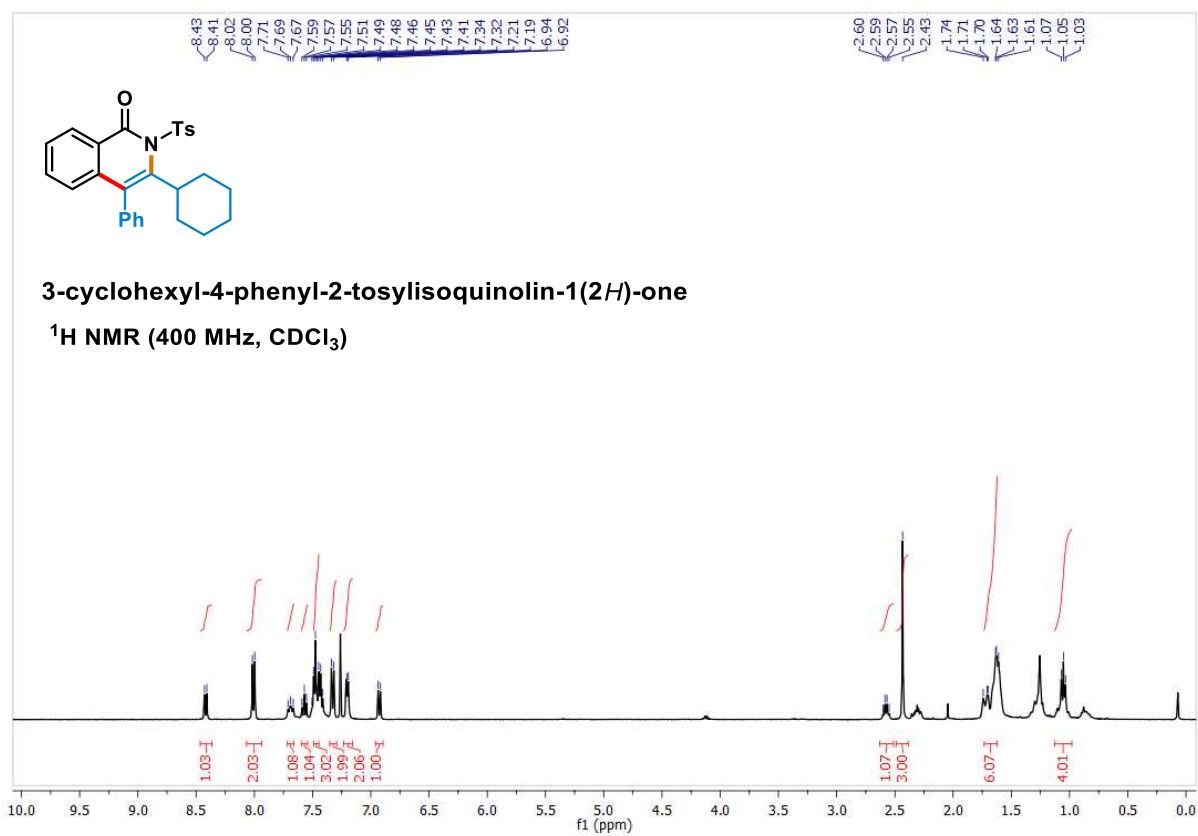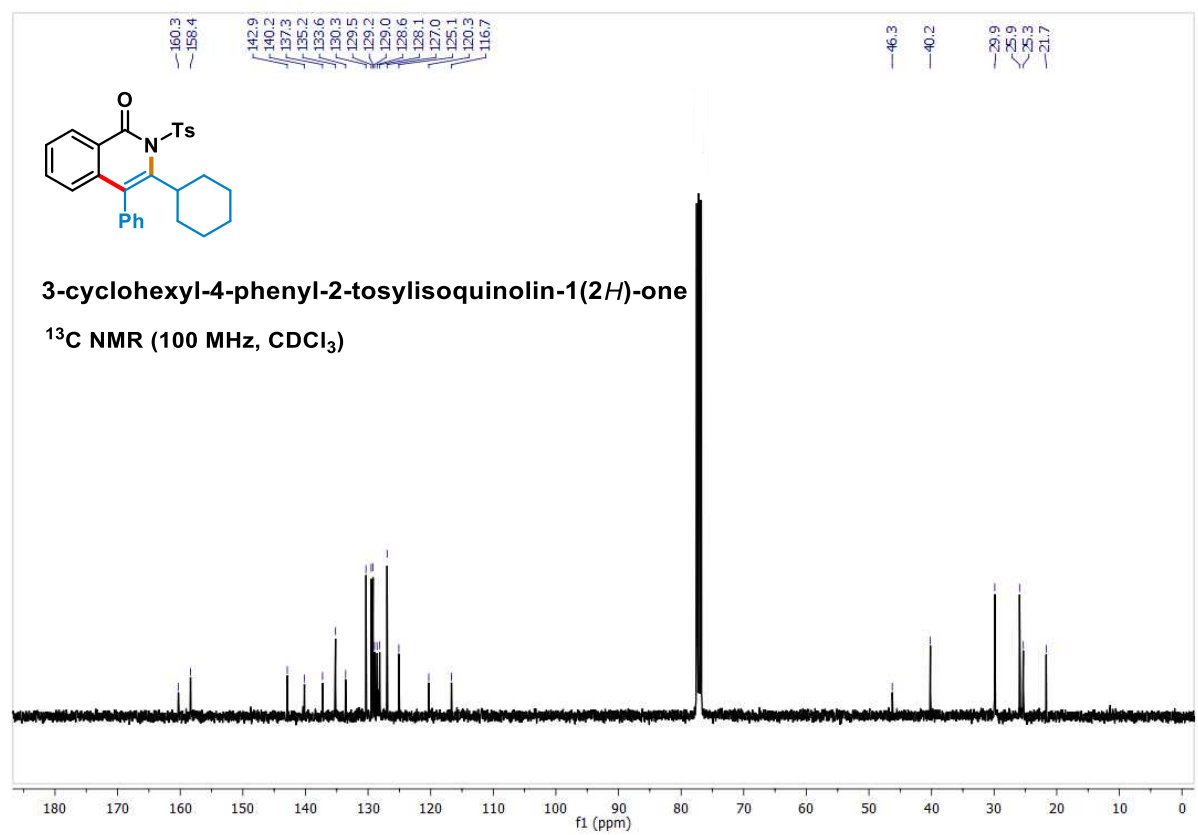



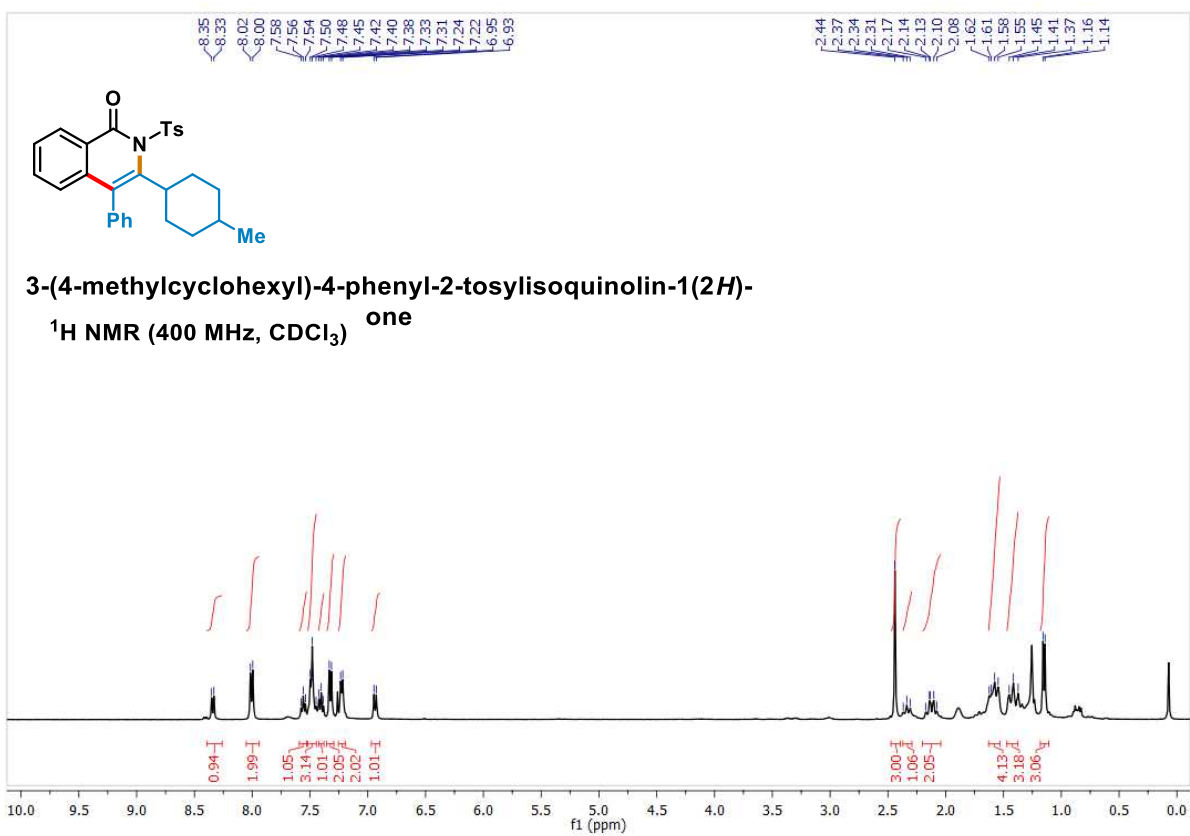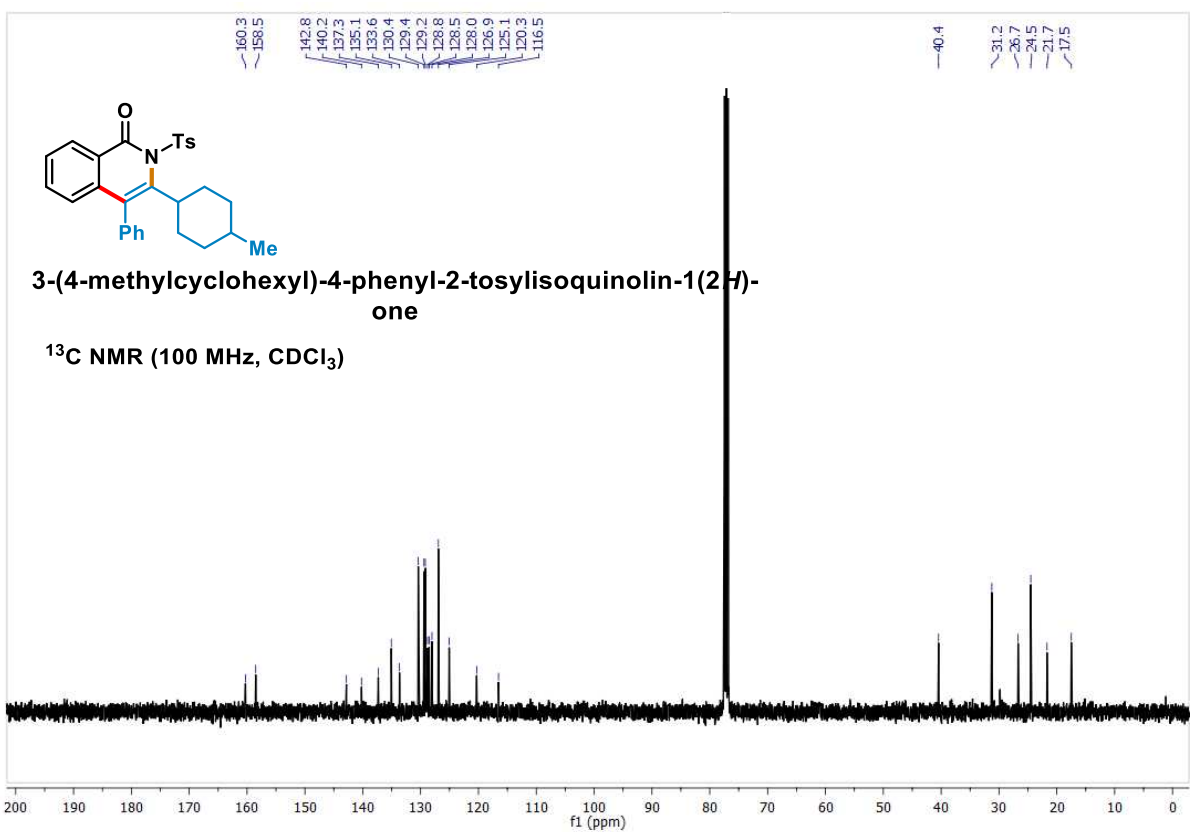

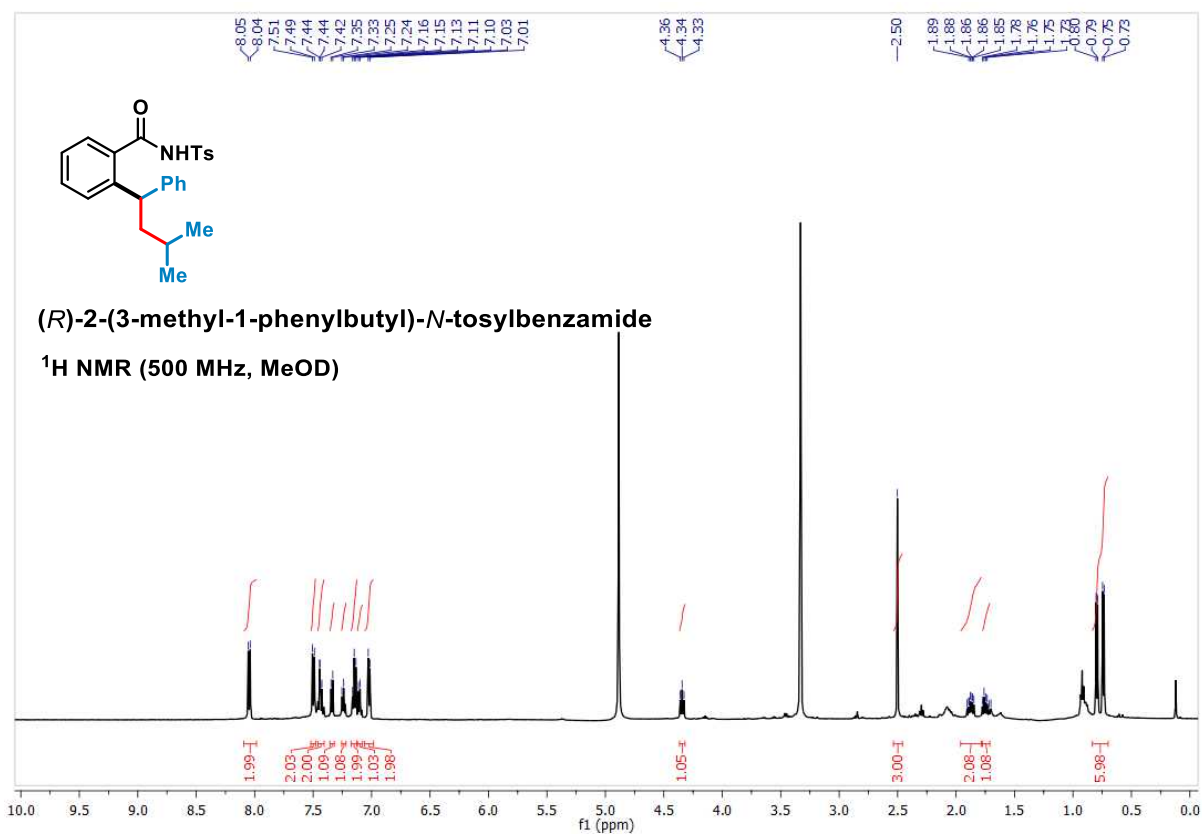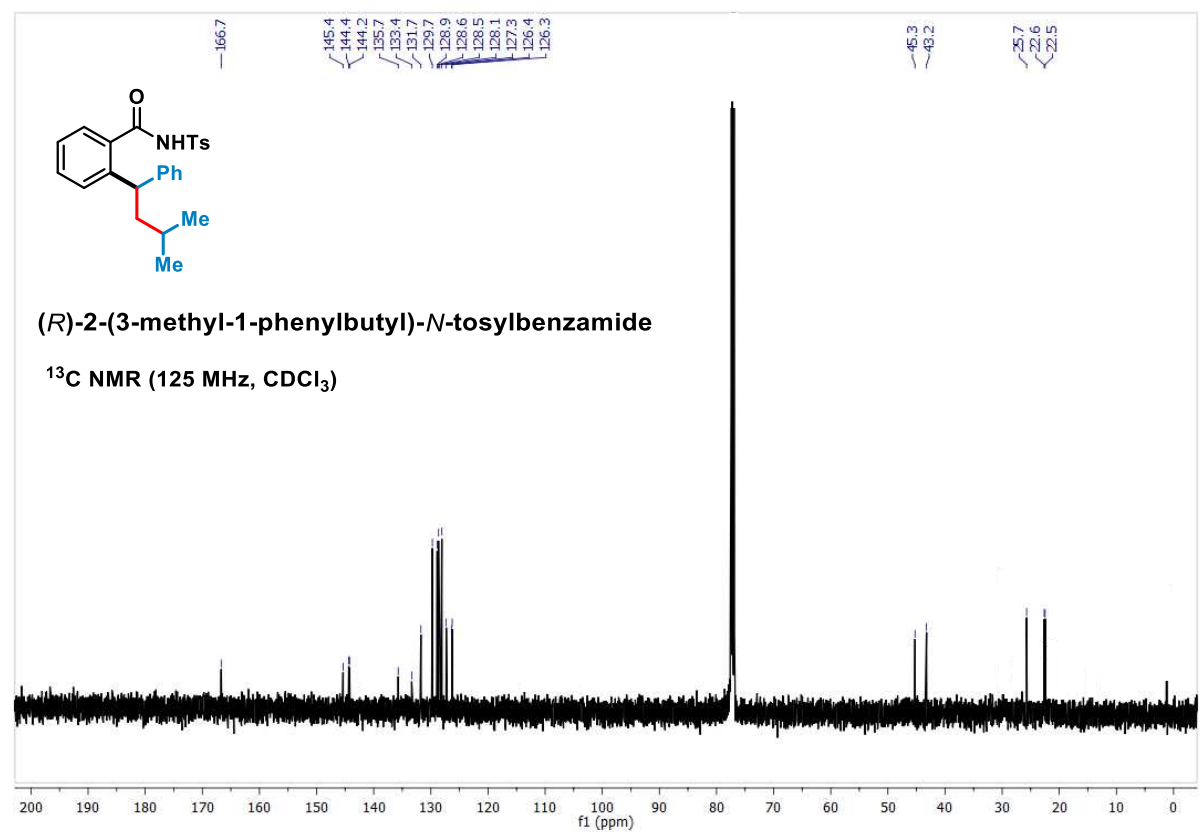

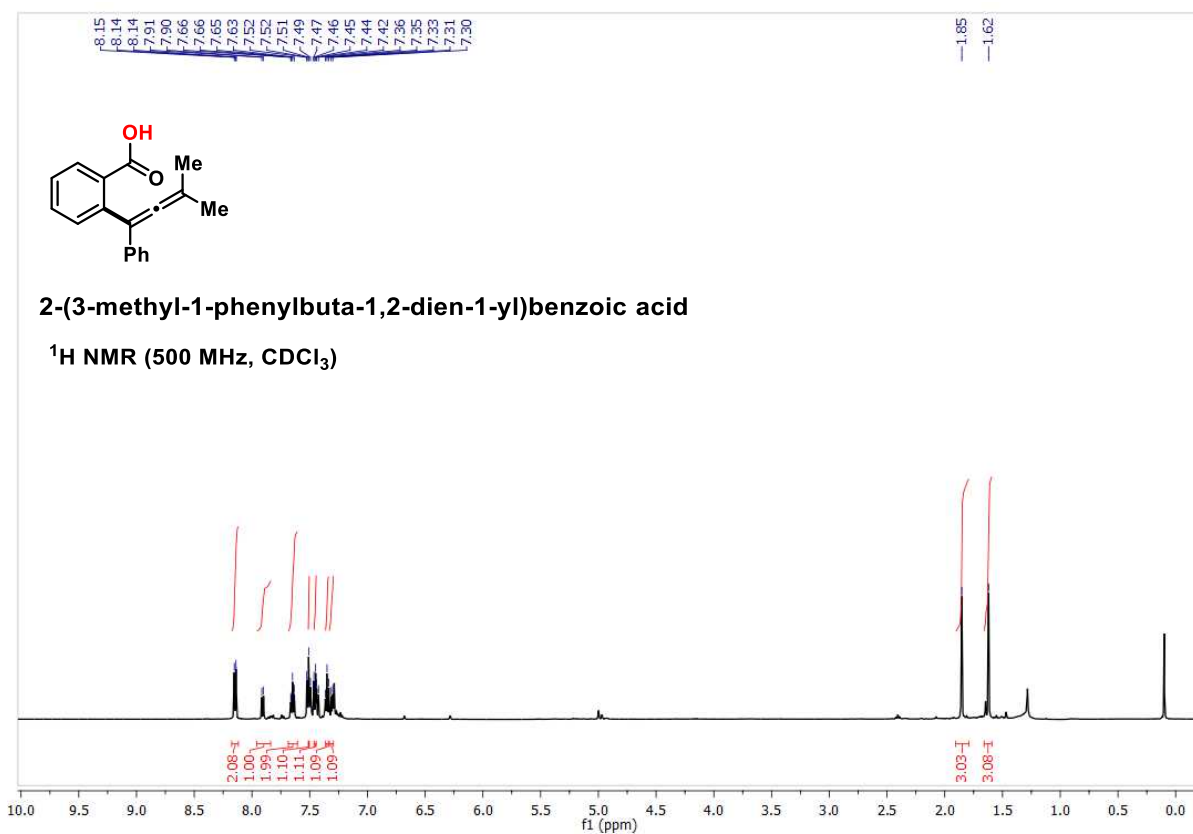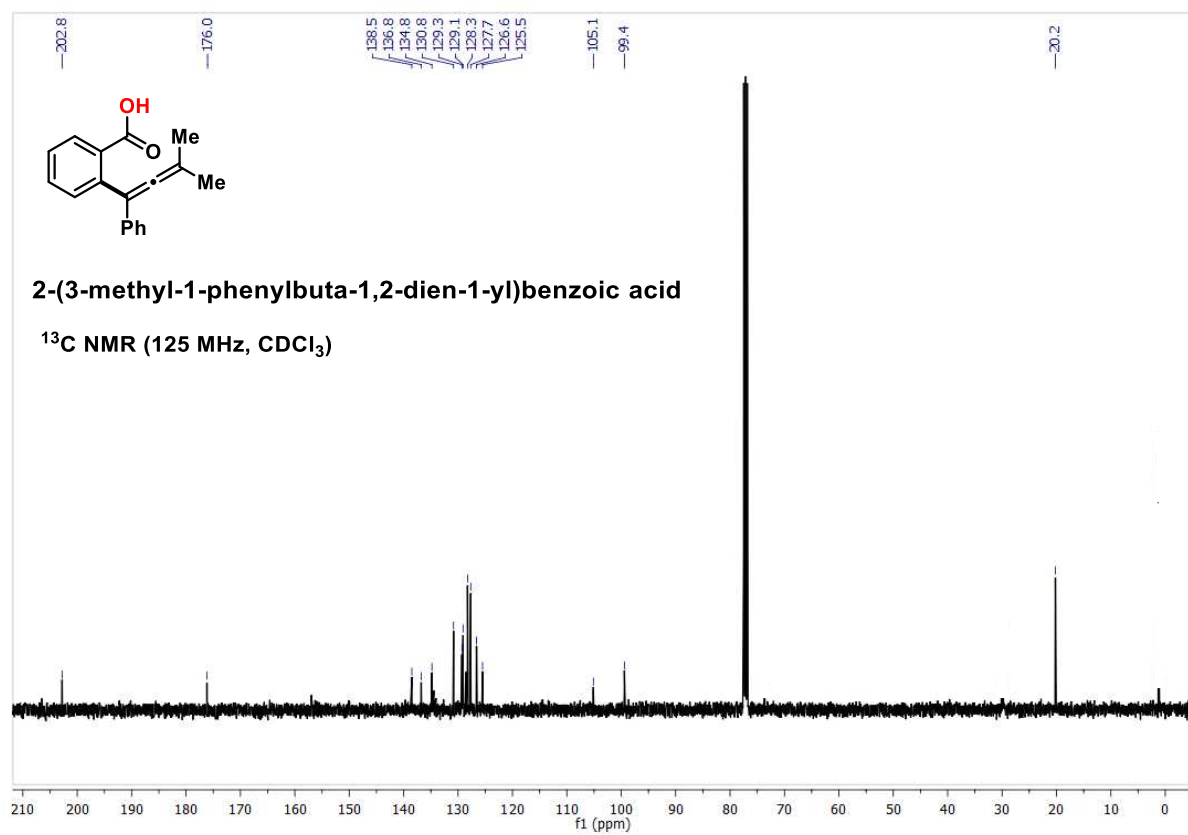

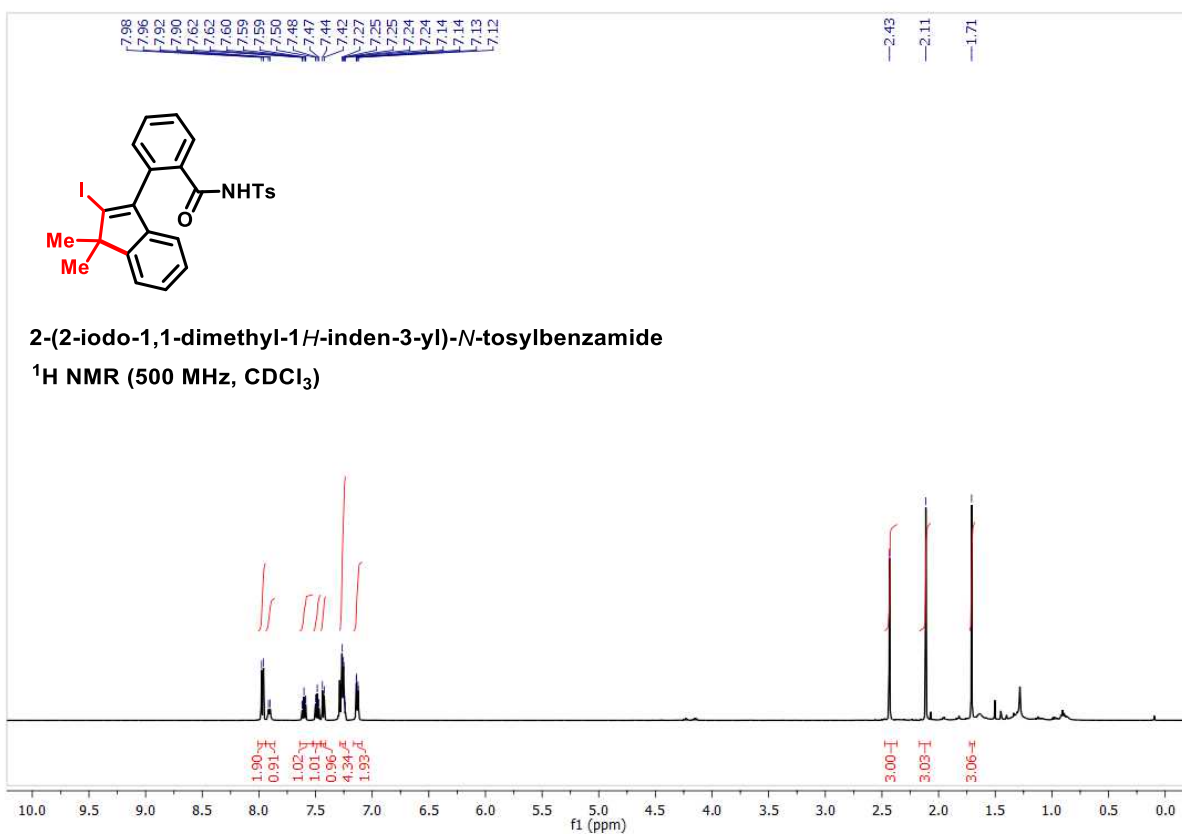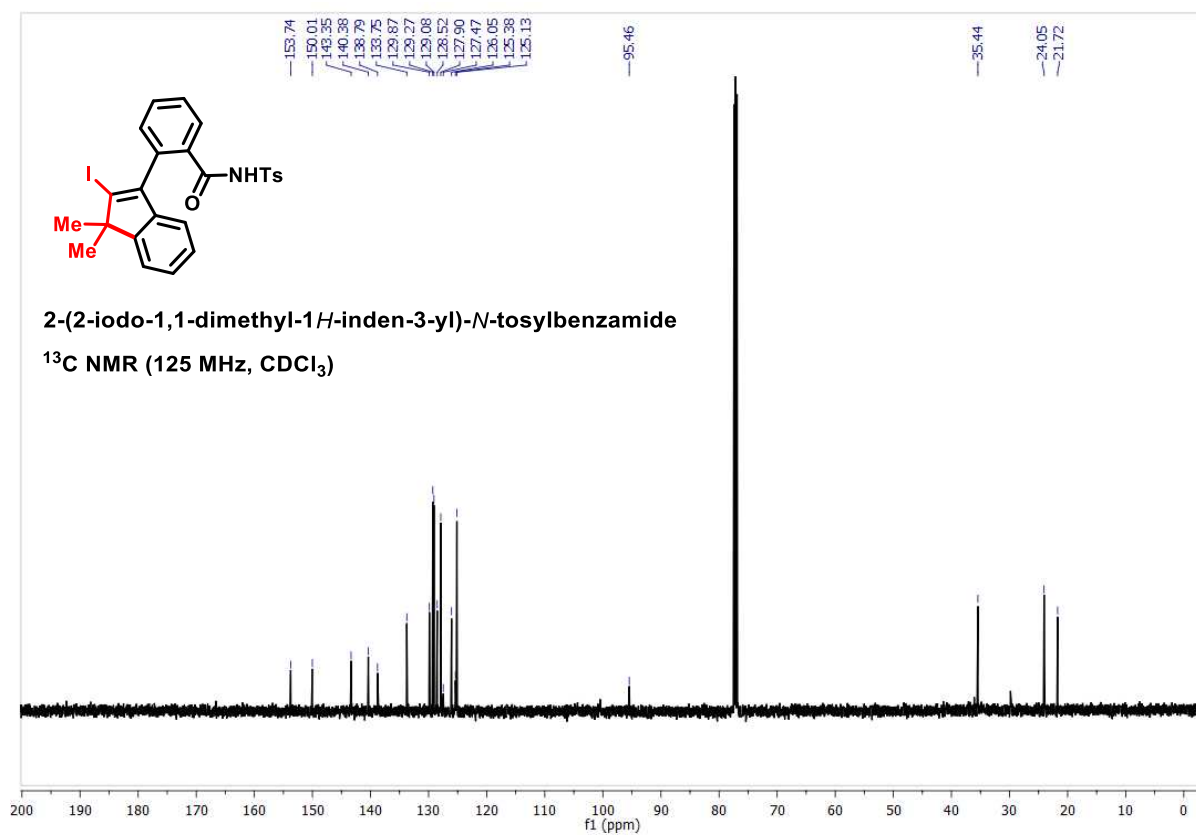

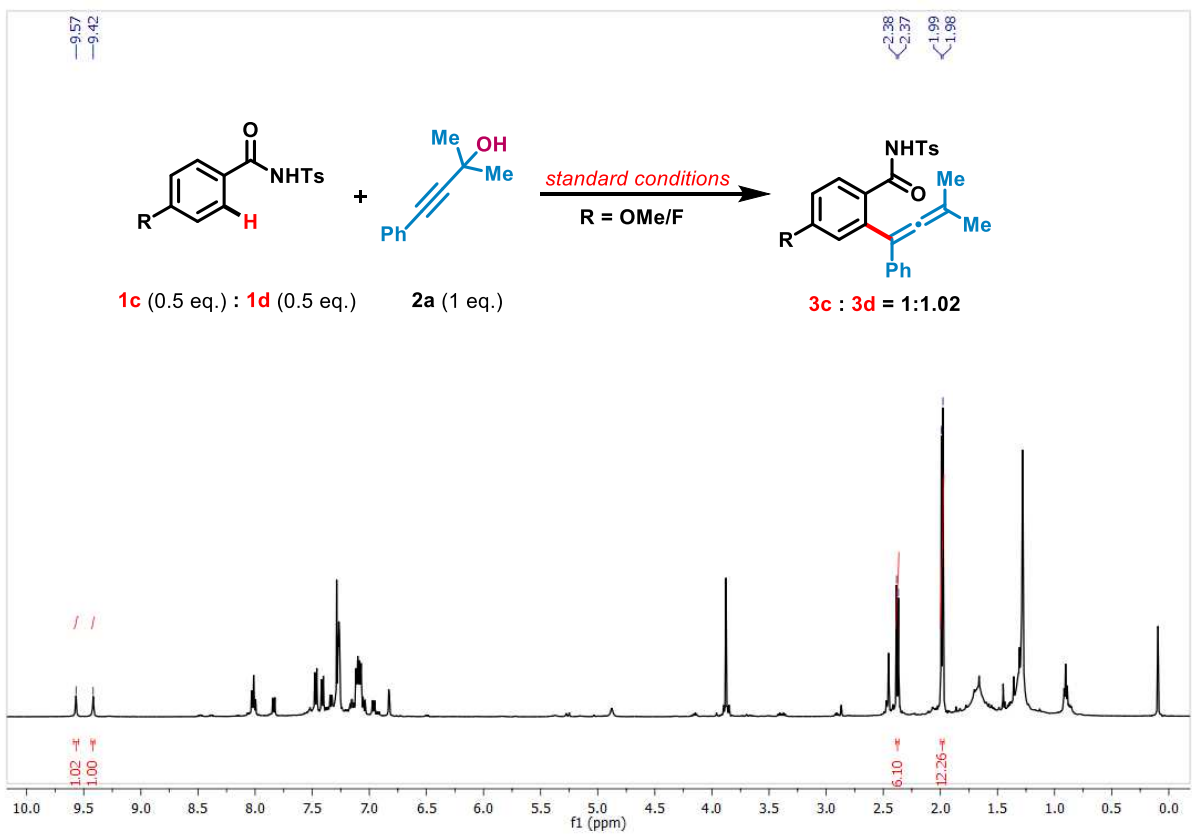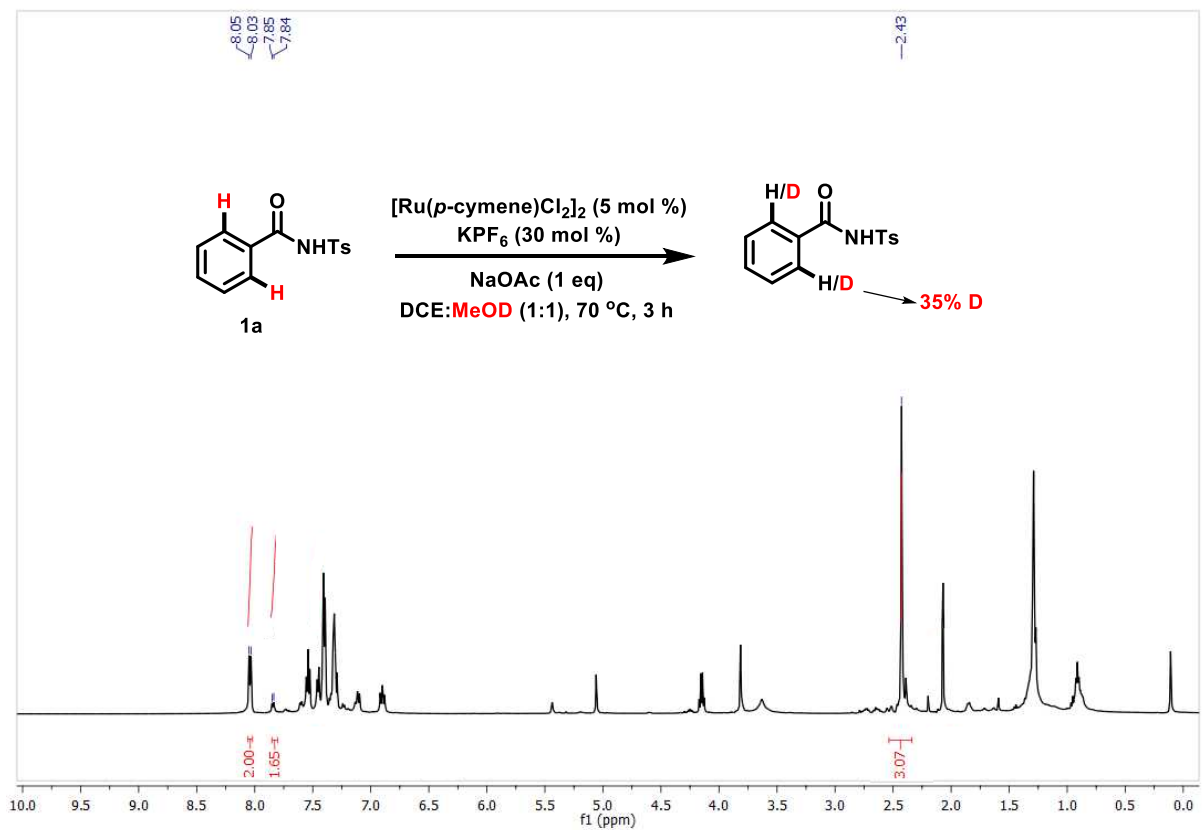

Supplement: d1cc01768c1.pdf [file d1cc01768c1.pdf]
