# Supplementary material for: Ru(ii)-catalyzed allenylation and sequential annulation of N-tosylbenzamides with propargyl alcohols
Source: Royal Society of Chemistry journal article supplement (doi:10.1039/d1cc01768c), 2021-01-01

a) Intermolecular competitive experiment

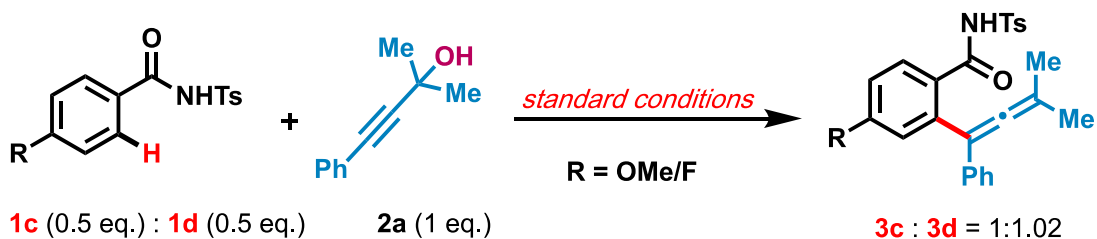

b) H/D Exchange experiment

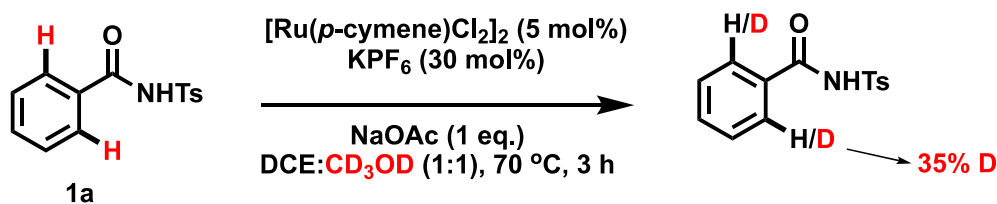

c) Kinetic isotopic studies

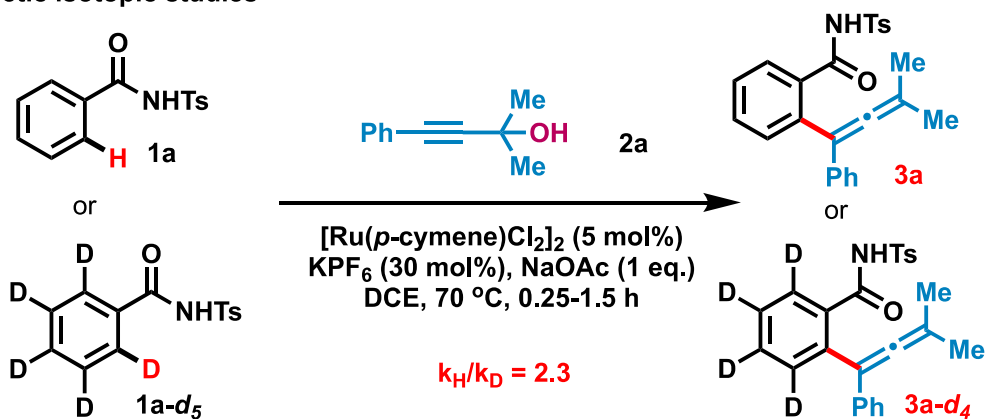

Supplement: d1cc01768c2.pdf [file d1cc01768c2.pdf]
